# Supplementary material
Source: PubMed Central journal article supplement (PMC6467270)
Supplement: NIHMS1012828-supplement-Supplement.pdf [file NIHMS1012828-supplement-Supplement.pdf]

## Supplementary Online Content

Ambrose BK, Day HR, Rostron B, et al. Flavored tobacco product use among US youth aged 12-17 years, 2013-2014. *JAMA*. doi:10.1001/jama.2015.13802.

**eAppendix.** PATH Final Youth Baseline Questionnaire—English

This supplementary material has been provided by the authors to give readers additional information about their work.

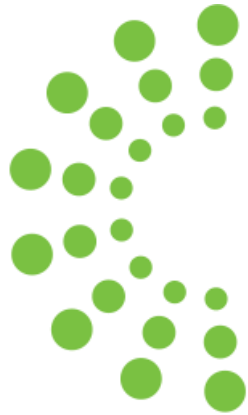

# PATH

Population Assessment  
of Tobacco and Health

*A collaboration between the NIH and FDA*

## **FINAL YOUTH BASELINE QUESTIONNAIRE - ENGLISH**

**Baseline (Wave 1)  
September 2013 - December 2014**

[WWW.PATHSTUDYINFO.NIH.GOV](http://WWW.PATHSTUDYINFO.NIH.GOV)

OMB Number: 0925-0664

Contract Number: HHSN271201100027C



## Table of Contents

---

|                                                  |     |
|--------------------------------------------------|-----|
| INTRODUCTORY DEMOGRAPHICS .....                  | 1   |
| CIGARETTES SECTION .....                         | 2   |
| E-CIGARETTE SECTION.....                         | 16  |
| CIGAR SECTION.....                               | 30  |
| PIPE TOBACCO SECTION .....                       | 50  |
| HOOKAH SECTION .....                             | 62  |
| SMOKELESS TOBACCO SECTION .....                  | 76  |
| DISSOLVABLE TOBACCO SECTION .....                | 92  |
| BIDIS AND KRETEKS SECTION .....                  | 105 |
| FIRST TOBACCO PRODUCT SECTION.....               | 120 |
| REASONS TO USE TOBACCO SECTION.....              | 121 |
| NICOTINE DEPENDENCE SECTION.....                 | 128 |
| CESSATION / QUITTER SECTION .....                | 132 |
| SECONDHAND SMOKE SECTION .....                   | 135 |
| MODIFIED RISK TOBACCO PRODUCTS SECTION.....      | 137 |
| PACKAGING AND HEALTH WARNINGS SECTION.....       | 138 |
| MARKETING SECTION.....                           | 147 |
| ACCESSIBILITY SECTION .....                      | 150 |
| MEDIA USE SECTION .....                          | 151 |
| PSYCHOSOCIAL SECTION.....                        | 156 |
| SUBSTANCE USE SECTION.....                       | 160 |
| AD EXPOSURE SECTION .....                        | 171 |
| DEMOGRAPHICS SECTION .....                       | 173 |
| CONTACT INFORMATION SECTION .....                | 189 |
| APPENDIX A: LOGIC CHECKS AND CONFIRMATIONS ..... | 196 |
| APPENDIX B: USER GROUP DEFINITIONS .....         | 210 |

## Final Youth Baseline Questionnaire - English

OMB Control Number: 0925-0664

Expiration Date: 11/30/2015

Public reporting burden for this collection of information is estimated to average 32 minutes per response, including the time for reviewing instructions, searching existing data sources, gathering and maintaining the data needed, and completing and reviewing the collection of information. An agency may not conduct or sponsor, and a person is not required to respond to, a collection of information unless it displays a currently valid OMB control number. Send comments regarding this burden estimate or any other aspect of this collection of information, including suggestions for reducing this burden, to: NIH, Project Clearance Branch, 6705 Rockledge Drive, MSC 7974, Bethesda, MD 20892-7974, ATTN: PRA (0925-0664). Do not return the completed form to this address.

## Final Youth Baseline Questionnaire - English

### INTRODUCTORY DEMOGRAPHICS

**PATH ID: YM0005**

Are you Hispanic, [Latino I Latina I Latino or Latina], or of Spanish origin? Choose all that apply.

- 1 No, not of Hispanic, [Latino I Latina I Latino or Latina], or Spanish origin
- 2 Yes, Mexican, Mexican American, [Chicano I Chicana I Chicano or Chicana]
- 3 Yes, Puerto Rican
- 4 Yes, Cuban
- 5 Yes, Another Hispanic, [Latino I Latina I Latino or Latina], or Spanish origin
- 8 DON'T KNOW
- 7 REFUSED

ASK: All respondents

PROGRAM: If male (HM0005=1), display "Latino" and "Chicano"; if female (HM0005=2), display "Latina" and "Chicana"; if don't know or refused (HM0005=-8 or -7), display "Latino or Latina" and "Chicano or Chicana".

Option 1 cannot be selected if options 2, 3, 4, or 5 are also selected.

**PATH ID: YM0006**

What is your race? Choose all that apply.

- 1 White
- 2 Black or African American
- 3 American Indian or Alaska Native
- 4 Asian Indian
- 5 Chinese
- 6 Filipino
- 7 Japanese
- 8 Korean
- 9 Vietnamese
- 10 Other Asian
- 11 Native Hawaiian
- 12 Guamanian or Chamorro
- 13 Samoan
- 14 Other Pacific Islander
- 8 DON'T KNOW
- 7 REFUSED

ASK: All respondents

## Final Youth Baseline Questionnaire - English

### CIGARETTES SECTION

**PATH ID: YC1002**

Have you ever tried cigarette smoking, even one or two puffs?

- |    |            |              |
|----|------------|--------------|
| 1  | Yes        | GO TO YC1006 |
| 2  | No         |              |
| -8 | DON'T KNOW |              |
| -7 | REFUSED    |              |

ASK: All respondents

**PATH ID: YC1103**

Have you ever been curious about smoking a cigarette?

- |    |                    |
|----|--------------------|
| 1  | Very curious       |
| 2  | Somewhat curious   |
| 3  | A little curious   |
| 4  | Not at all curious |
| -8 | DON'T KNOW         |
| -7 | REFUSED            |

ASK: Respondents who have not tried a cigarette (YC1002=2, -8 or -7).

**PATH ID: YC9101**

Do you think you will smoke a cigarette in the next year?

- |    |                |              |
|----|----------------|--------------|
| 1  | Definitely yes |              |
| 2  | Probably yes   |              |
| 3  | Probably not   | GO TO YC1105 |
| 4  | Definitely not | GO TO YC1105 |
| -8 | DON'T KNOW     | GO TO YC1105 |
| -7 | REFUSED        | GO TO YC1105 |

ASK: Respondents who have not tried a cigarette (YC1002=2, -8 or -7).

## Final Youth Baseline Questionnaire - English

**PATH ID: YC1104**

Do you think that you will try a cigarette soon?

- 1 Definitely yes
- 2 Probably yes
- 3 Probably not
- 4 Definitely not
- 8 DON'T KNOW
- 7 REFUSED

ASK: Respondents who think they will smoke a cigarette in the next year (YC9101=1 or 2).

**PATH ID: YC1105**

If one of your best friends were to offer you a cigarette, would you smoke it?

- 1 Definitely yes
- 2 Probably yes
- 3 Probably not
- 4 Definitely not
- 8 DON'T KNOW
- 7 REFUSED

ASK: Respondents who have not tried a cigarette (YC1002=2, -8 or -7).

GO TO: If respondent has never tried a cigarette (YC1002=2, -8 or -7), go to YC1124.

Else go to YC1006.

**PATH ID: YC1006**

How old were you when you first tried cigarette smoking, even one or two puffs?

- 1 |\_\_|\_\_| GO TO YC9020
- 8 DON'T KNOW
- 7 REFUSED

ASK: Respondents who have tried a cigarette (YC1002=1).

PROGRAM: Allow 2 digits for age.

DISPLAY: Display "Years old" as a title.

**PATH ID: YC1120**

When you first tried cigarette smoking, even one or two puffs, were you...

- 1 Less than 12 years old,
- 2 12 to 14 years old, or
- 3 15 to 17 years old?
- 8 DON'T KNOW
- 7 REFUSED

ASK: All respondents who refused to give or did not know age (YC1006=-8 or -7)



## Final Youth Baseline Questionnaire - English

**PATH ID: YC9020**

Was the first cigarette you smoked flavored to taste like menthol or mint?

- 1 Yes
  - 2 No
  - 8 DON'T KNOW
  - 7 REFUSED
- GO TO YC9104

ASK: Respondents who have tried a cigarette (YC1002=1).

**PATH ID: YC9021**

Was the first cigarette you smoked flavored to taste like clove, spice, candy, fruit, chocolate, alcohol (such as wine or cognac), or other sweets?

- 1 Yes
- 2 No
- 8 DON'T KNOW
- 7 REFUSED

ASK: Respondents whose first cigarette was not menthol (YC9020=2, -8 or -7)

**PATH ID: YC9104**

How much did you experience pleasant sensations the first time you smoked a cigarette?

- 1 Not at all
- 2 A little
- 3 Somewhat
- 4 A lot
- 8 DON'T KNOW
- 7 REFUSED

ASK: Respondents who have tried a cigarette (YC1002=1).

**PATH ID: YC9105**

How much did you experience unpleasant sensations the first time you smoked a cigarette?

- 1 Not at all
- 2 A little
- 3 Somewhat
- 4 A lot
- 8 DON'T KNOW
- 7 REFUSED

ASK: Respondents who have tried a cigarette (YC1002=1).

## Final Youth Baseline Questionnaire - English

**PATH ID: YC9106**

How much did you feel sick to your stomach the first time you smoked a cigarette?

- 1 Not at all
- 2 A little
- 3 Somewhat
- 4 A lot
- 8 DON'T KNOW
- 7 REFUSED

ASK: Respondents who have tried a cigarette (YC1002=1).

**PATH ID: YC9022**

Do you consider yourself a smoker?

- 1 Yes
- 2 No
- 8 DON'T KNOW
- 7 REFUSED

ASK: Respondents who have tried a cigarette (YC1002=1).

**PATH ID: YC1005**

How many cigarettes have you smoked in your entire life? A pack usually has 20 cigarettes in it.

- 1 1 or more puffs but never a whole cigarette
- 2 1 cigarette
- 3 2 to 10 cigarettes (about ½ pack total)
- 4 11 to 20 cigarettes (about ½ pack to 1 pack)
- 5 21 to 50 cigarettes (more than 1 pack but less than 3 packs)
- 6 51 to 99 cigarettes (more than 2 ½ packs but less than 5 packs)
- 7 100 or more cigarettes (5 packs or more)
- 8 DON'T KNOW
- 7 REFUSED

ASK: Respondents who have tried a cigarette (YC1002=1).

## Final Youth Baseline Questionnaire - English

**PATH ID: YC1112**

When was the last time you smoked a cigarette, even one or two puffs?

- |    |                                                           |              |
|----|-----------------------------------------------------------|--------------|
| 1  | Earlier today                                             |              |
| 2  | Not today but sometime in the past 7 days                 |              |
| 3  | Not in the past 7 days but sometime in the past 30 days   |              |
| 4  | Not in the past 30 days but sometime in the past 6 months | GO TO YC1124 |
| 5  | Not in the past 6 months but sometime in the past year    | GO TO YC1124 |
| 6  | 1 to 4 years ago                                          | GO TO YC1124 |
| 7  | 5 or more years ago                                       | GO TO YC1124 |
| -8 | DON'T KNOW                                                | GO TO YC1124 |
| -7 | REFUSED                                                   | GO TO YC1124 |

ASK: Respondents who have tried a cigarette (YC1002=1).

PROGRAM:

CREATE VARIABLES:

### **PAST30DAY\_CIGS (Past 30 Day Users)**

PAST30DAY\_CIGS = 1 Yes, if respondent has smoked a cigarette within the past 30 days (YC1112=1 or 2 or 3).

Else PAST30DAY\_CIGS = 2 No.

### **PAST30DAY\_VL\_CIGS (Past 30 Day Very Light Users)**

PAST30DAY\_VL\_CIGS = 1 Yes, if respondent has smoked less than 10 cigarettes in lifetime (YC1005=1 or 2 or 3) AND last smoked a cigarette in the past 30 days (YC1112=1 or 2 or 3).

Else PAST30DAY\_VL\_CIGS = 2 No.

### **PAST30DAY\_NL\_CIGS (Past 30 Day Not Light Users)**

PAST30DAY\_NL\_CIGS = 1 Yes, if respondent has smoked more than 10 cigarettes in lifetime (YC1005 > 3) AND last smoked a cigarette within the past 30 days (YC1112=1 or 2 or 3).

Else PAST30DAY\_NL\_CIGS = 2 No.

**PATH ID: YC1022**

In the past 30 days, on how many days did you smoke cigarettes?

- |    |            |
|----|------------|
| 1  | _ _        |
| -8 | DON'T KNOW |
| -7 | REFUSED    |

ASK: Respondents who have smoked in the past 30 days (PAST30DAY\_CIGS = 1)

PROGRAM: Range check (1-30 days)

## Final Youth Baseline Questionnaire - English

**PATH ID: YC1023**

In the past 30 days, on the days you smoked, how many cigarettes did you smoke per day? A pack usually has 20 cigarettes in it.

- 1 Less than 1 cigarette per day
- 2 1 cigarette per day
- 3 2 to 5 cigarettes per day
- 4 6 to 10 cigarettes per day
- 5 11 to 20 cigarettes per day
- 6 More than 20 cigarettes per day
- 8 DON'T KNOW
- 7 REFUSED

ASK: Respondents who have smoked a cigarette in the past 30 days (PAST30DAY\_CIGS = 1).

**PATH ID: YC9108**

In the past 30 days, were any of the cigarettes you smoked flavored to taste like menthol or mint?

- 1 Yes
- 2 No
- 8 DON'T KNOW
- 7 REFUSED

ASK: Respondents who have smoked a cigarette in the past 30 days (PAST30DAY\_CIGS = 1).

**PATH ID: YC1123**

In the past 30 days, did anyone refuse to sell you cigarettes because of your age?

- 1 Yes
- 2 No
- 3 I did not try to buy cigarettes in the past 30 days
- 8 DON'T KNOW
- 7 REFUSED

ASK: Respondents who have smoked a cigarette in the past 30 days (PAST30DAY\_CIGS = 1).

## Final Youth Baseline Questionnaire - English

**PATH ID: YC1118**

In the past 30 days, how did you usually get your own cigarettes?

- |    |                                                    |              |
|----|----------------------------------------------------|--------------|
| 1  | I bought cigarettes myself                         |              |
| 2  | I gave someone else money to buy cigarettes for me | GO TO YC1030 |
| 3  | I asked someone to give me a cigarette             | GO TO YC1047 |
| 4  | Someone offered me a cigarette                     | GO TO YC1047 |
| 5  | I bought cigarettes from another person            | GO TO YC1047 |
| 6  | I took cigarettes from a store or another person   | GO TO YC1047 |
| 7  | I got cigarettes some other way                    | GO TO YC1047 |
|    | SPECIFY _____                                      |              |
| -8 | DON'T KNOW                                         | GO TO YC1047 |
| -7 | REFUSED                                            | GO TO YC1047 |

ASK: Respondents who have smoked a cigarette in the past 30 days (PAST30DAY\_CIGS = 1).

[PROGRAM: If OS field selected and additional OS screen is shown, display question text and add the following text: "Please type your answer using the computer keyboard."]

GO TO: If PAST30DAY\_VL\_CIGS=1, go to YC1124

Else go to YC1097.

**PATH ID: YC1097**

In the past 30 days, did you use a coupon when buying cigarettes?

- |    |            |              |
|----|------------|--------------|
| 1  | Yes        |              |
| 2  | No         | GO TO YC1030 |
| -8 | DON'T KNOW | GO TO YC1030 |
| -7 | REFUSED    | GO TO YC1030 |

ASK: Respondents who have smoked a cigarette in the past 30 days (PAST30DAY\_NL\_CIGS = 1) AND who have tried to buy cigarettes in the past 30 days (YC1123 NE 3) AND bought cigarettes themselves in the past 30 days (YC1118=1)

**PATH ID: YC1098**

How many times in the past 30 days have you used a coupon to buy cigarettes?

- |    |            |  |
|----|------------|--|
| 1  | _ _        |  |
| -8 | DON'T KNOW |  |
| -7 | REFUSED    |  |

ASK: Respondents who have smoked a cigarette in the past 30 days (PAST30DAY\_NL\_CIGS = 1) AND used a coupon in the past 30 days (YC1097=1)

## Final Youth Baseline Questionnaire - English

**PATH ID: YC1030**

How do [you/they] usually buy your cigarettes? Is it...

- 1 In person
- 2 From the internet GO TO YC1039
- 3 By telephone GO TO YC1039
- 8 DON'T KNOW GO TO YC1039
- 7 REFUSED GO TO YC1039

ASK: Respondents who have smoked a cigarette in the past 30 days (PAST30DAY\_NL\_CIGS = 1) AND indicated that they bought cigarettes for themselves or that someone else bought cigarettes for them in the past 30 days (YC1118 = 1 or 2).

PROGRAM: If YC1118=1, display "you"; If YC1118=2, display "they".

**PATH ID: YC1032**

Do [you/they] usually buy cigarettes...

- 1 In your own state
- 2 In another state
- 3 Outside the US
- 8 DON'T KNOW
- 7 REFUSED

ASK: Respondents who have smoked a cigarette in the past 30 days (PAST30DAY\_NL\_CIGS = 1) AND indicated that the cigarettes they bought or that someone else bought for them were purchased in person (YC1030= 1).

PROGRAM: If YC1118=1, display "you"; If YC1118=2, display "they"

**PATH ID: YC1033**

Where do [you/they] buy your cigarettes most of the time?

- 1 A convenience store or gas station
- 2 A supermarket, grocery store, or drug store
- 3 A warehouse club, such as Sam's or Costco
- 4 A smoke shop, tobacco specialty store or tobacco outlet store
- 5 A duty free shop or military commissary
- 6 A bar, pub, restaurant or casino
- 7 A friend or relative [DISPLAY ONLY IF YC1118 = 1]
- 8 A swap meet or flea market
- 9 A store on an Indian reservation
- 10 Or from somewhere else SPECIFY: \_\_\_\_\_
- 8 DON'T KNOW
- 7 REFUSED

ASK: Respondents who have smoked a cigarette in the past 30 days (PAST30DAY\_NL\_CIGS = 1) AND indicated that the cigarettes they bought or that someone else bought for them were purchased in person (YC1030= 1).

PROGRAM: If YC1118=1, display "you"; If YC1118=2, display "they".

If YC1118=1, display option 7=' A friend or relative,' if YC1118 NE 1, hide option 7.

If OS field selected and additional OS screen is shown, display question text and add the following text: "Please type your answer using the computer keyboard."

## Final Youth Baseline Questionnaire - English

**PATH ID: YC1039**

Do [you I they] usually buy cigarettes by the carton, pack, or as single cigarettes?

- 1 Carton
- 2 Pack
- 3 Single Cigarette
- 8 DON'T KNOW
- 7 REFUSED

ASK: Respondents who have smoked a cigarette in the past 30 days (PAST30DAY\_NL\_CIGS = 1) AND indicated that they bought cigarettes for themselves or that someone else bought cigarettes for them in the past 30 days (YC1118 = 1 or 2).

PROGRAM: If YC1118=1, display "you"; If YC1118=2, display "they"

**PATH ID: YC1047**

Do you have a regular brand of cigarettes that you usually smoke?

- 1 Yes
- 2 No
- 8 DON'T KNOW
- 7 REFUSED

ASK: Respondents who have smoked a cigarette in the past 30 days (PAST30DAY\_NL\_CIGS = 1)

**PATH ID: YC1048**

What brand of cigarette [do I did] you [usually I last] smoke? Please select it from the choices below by touching the screen. [ If you do not see it below, touch the button marked "NEXT". I If you do not see it below, touch the box marked "Something else". ]

**PROGRAM:**

**[If multiple screens]** Display: If you do not see it below, touch the button marked "NEXT".

**[If single screen OR last screen of multiple screens]** Display: If you do not see it below, touch the box marked "Something else".

[SHOW PICTURES OF THE MAJOR BRANDS ON THE TOUCHSCREEN. WHEN A RESPONDENT SELECTS A BRAND, GO TO YC1070]

- |    |                |              |
|----|----------------|--------------|
| 1  | Something else | GO TO YC1049 |
| -8 | DON'T KNOW     | GO TO YC1051 |
| -7 | REFUSED        | GO TO YC1051 |

ASK: Respondents who have smoked a cigarette in the past 30 days (PAST30DAY\_NL\_CIGS = 1).

PROGRAM: If YC1047=1, display "do" and "usually". If YC1047=2, DK or RF, display "did" and "last"

## Final Youth Baseline Questionnaire - English

### PATH ID: YC1070

You selected [BRANDFILL] as your brand. What kind of [BRANDFILL] [do I did] you [usually I last] smoke? Please select it from the choices below by touching the screen. [ If you do not see it below, touch the button marked "NEXT". I If you do not see it below, touch the box marked "Something else". ]

#### PROGRAM:

[If multiple screens] Display: If you do not see it below, touch the button marked "NEXT".

[If single screen OR last screen of multiple screens] Display: If you do not see it below, touch the box marked "Something else".

[SHOW PICTURES OR TEXT ON THE TOUCHSCREEN OF THE MAJOR PRODUCTS ASSOCIATED WITH BRAND SELECTED IN YC1048]

- |    |                |              |
|----|----------------|--------------|
| 1  | Something else | GO TO YC1071 |
| -8 | DON'T KNOW     | GO TO YC1051 |
| -7 | REFUSED        | GO TO YC1051 |

ASK: Respondents who have smoked a cigarette in the past 30 days (PAST30DAY\_NL\_CIGS = 1) and selected a brand image in YC1048.

PROGRAM: If YC1047=1, display "do" and "usually". If YC1047=2, DK or RF, display "did" and "last"

### PATH ID: YC1049

You said that your brand was not pictured. What is it?

- |    |            |              |
|----|------------|--------------|
| 1  | _____      | GO TO YC1051 |
| -8 | DON'T KNOW | GO TO YC1051 |
| -7 | REFUSED    | GO TO YC1051 |

ASK: Respondents who have smoked a cigarette in the past 30 days (PAST30DAY\_NL\_CIGS = 1) AND did not select an image for their brand (YC1048 = 1).

### PATH ID: YC1071

You said that the type of [BRANDFILL]s that you smoke was not pictured. What type is it?

- |    |            |  |
|----|------------|--|
| 1  | _____      |  |
| -8 | DON'T KNOW |  |
| -7 | REFUSED    |  |

ASK: Respondents who have smoked a cigarette in the past 30 days (PAST30DAY\_NL\_CIGS = 1) who did not select the type of product they use (YC1070="Something else") but who DID select a brand (YC1048<>1, -8, -7). Do not ask of respondents who wrote a brand into YC1049.



## Final Youth Baseline Questionnaire - English

**PATH ID: YC1051**

About how long have you been smoking your regular brand of cigarettes? Please choose whether you've been smoking your regular brand for years, months, or days. Then enter the number of years, months, or days using the number keypad.

- 1 |\_\_|\_\_|  
DAYS
- 2 |\_\_|\_\_|  
MONTHS
- 3 |\_\_|\_\_|  
YEARS
- 8 DON'T KNOW
- 7 REFUSED

ASK: Respondents who have smoked a cigarette in the past 30 days (PAST30DAY\_NL\_CIGS = 1)  
AND have a regular brand (YC1047=1)

PROGRAM: Display as Quantity/Units

Box YC3

Display questions YC9010, YC9012, YC9014, YC9017, YC9115, YC9116, YC9117, on one screen. Show the intro/transition text from YC9010 first, then show each item with a Y/N response. As each item is answered, show the next one.

PROGRAM: Randomize order of YC9010 through YC9117.

**PATH ID: YC9010**

In choosing your regular brand of cigarettes, was part of your decision based on any of the following?  
It is less expensive.

- 1 Yes
- 2 No
- 8 DON'T KNOW
- 7 REFUSED

ASK: Respondents who have smoked a cigarette in the past 30 days (PAST30DAY\_NL\_CIGS = 1)  
AND have a regular brand (YC1047=1)

**PATH ID: YC9012**

The design of the pack.

- 1 Yes
- 2 No
- 8 DON'T KNOW
- 7 REFUSED

ASK: Respondents who have smoked a cigarette in the past 30 days (PAST30DAY\_NL\_CIGS = 1)  
AND have a regular brand (YC1047=1)

## Final Youth Baseline Questionnaire - English

**PATH ID: YC9014**

The taste.

- 1 Yes
- 2 No
- 8 DON'T KNOW
- 7 REFUSED

ASK: Respondents who have smoked a cigarette in the past 30 days (PAST30DAY\_NL\_CIGS = 1)  
AND have a regular brand (YC1047=1)

**PATH ID: YC9017**

People who are important to you smoke this brand.

- 1 Yes
- 2 No
- 8 DON'T KNOW
- 7 REFUSED

ASK: Respondents who have smoked a cigarette in the past 30 days (PAST30DAY\_NL\_CIGS = 1)  
AND have a regular brand (YC1047=1)

**PATH ID: YC9115**

Because it is a popular brand.

- 1 Yes
- 2 No
- 8 DON'T KNOW
- 7 REFUSED

ASK: Respondents who have smoked a cigarette in the past 30 days (PAST30DAY\_NL\_CIGS = 1)  
AND have a regular brand (YC1047=1)

**PATH ID: YC9116**

People in the media smoke this brand.

- 1 Yes
- 2 No
- 8 DON'T KNOW
- 7 REFUSED

ASK: Respondents who have smoked a cigarette in the past 30 days (PAST30DAY\_NL\_CIGS = 1)  
AND have a regular brand (YC1047=1)

## Final Youth Baseline Questionnaire - English

**PATH ID: YC9117**

This brand is easy for you to get.

- 1 Yes
- 2 No
- 8 DON'T KNOW
- 7 REFUSED

ASK: Respondents who have smoked a cigarette in the past 30 days (PAST30DAY\_NL\_CIGS = 1) AND have a regular brand (YC1047=1)

**PATH ID: YC9019**

Do you think the brand of cigarettes you usually smoke might be less harmful, no different, or more harmful, compared to other cigarette brands?

- 1 Less harmful
- 2 No different
- 3 More harmful
- 8 DON'T KNOW
- 7 REFUSED

ASK: Respondents who have smoked a cigarette in the past 30 days (PAST30DAY\_NL\_CIGS = 1) and who have a regular brand (YC1047=1).

**PATH ID: YC1124**

How likely is someone to become addicted to cigarettes?

- 1 Very unlikely
- 2 Somewhat unlikely
- 3 Neither likely nor unlikely
- 4 Somewhat likely
- 5 Very likely
- 8 DON'T KNOW
- 7 REFUSED

ASK: All respondents

**PATH ID: YC1125**

How much do you think people harm themselves when they smoke cigarettes?

- 1 No harm
- 2 Little harm
- 3 Some harm
- 4 A lot of harm
- 8 DON'T KNOW
- 7 REFUSED

ASK: All respondents

## Final Youth Baseline Questionnaire - English

**PATH ID: YC9118**

Are cigarettes flavored like menthol or mint harder to smoke, about the same, or easier to smoke than regular cigarettes?

- 1 Harder to smoke
- 2 About the same
- 3 Easier to smoke
- 8 DON'T KNOW
- 7 REFUSED

ASK: All respondents.

## Final Youth Baseline Questionnaire - English

### E-CIGARETTE SECTION

The next questions are about **electronic cigarettes**, often called **e-cigarettes**. E-cigarettes look like regular cigarettes, but are battery-powered and produce vapor instead of smoke. There are many types of e-cigarettes. Some common brands include NJOY, Blu and Smoking Everywhere.

E-cigarettes can be bought as one-time, disposable products, or can be bought as re-usable kits with a cartridge. Some people refill their own cartridges with nicotine fluid, sometimes called “e-juice” or “e-liquid”. Disposable e-cigarettes, e-cigarette cartridges and e-liquid come in many different flavors and nicotine concentrations.

SHOW GENERIC IMAGES OF E-CIGARETTES, CARTRIDGES AND JUICE.

#### PATH ID: YE1001

Have you ever seen or heard of an electronic cigarette or e-cigarette before this study?

- |    |            |               |
|----|------------|---------------|
| 1  | Yes        |               |
| 2  | No         | GO TO BOX YG1 |
| -8 | DON'T KNOW | GO TO BOX YG1 |
| -7 | REFUSED    | GO TO BOX YG1 |

ASK: All respondents.

SHOW GENERIC IMAGES OF E-CIGARETTES

#### PATH ID: YE1002

Have you ever used an e-cigarette, such as NJOY, Blu, or Smoking Everywhere, even one or two times?

- |    |            |              |
|----|------------|--------------|
| 1  | Yes        | GO TO YE1005 |
| 2  | No         |              |
| -8 | DON'T KNOW |              |
| -7 | REFUSED    |              |

ASK: Respondents who have seen or heard of e-cigarettes (YE1001 = 1).

SHOW GENERIC IMAGES OF E-CIGARETTES

#### PATH ID: YE1103

Have you ever been curious about using e-cigarettes?

- |    |                    |
|----|--------------------|
| 1  | Very curious       |
| 2  | Somewhat curious   |
| 3  | A little curious   |
| 4  | Not at all curious |
| -8 | DON'T KNOW         |
| -7 | REFUSED            |

ASK: Respondents who have seen or heard of but never used e-cigarettes (YE1001 = 1 AND YE1002 = 2, -8 or -7).

## Final Youth Baseline Questionnaire - English

**PATH ID: YE1104**

Do you think that you will try an e-cigarette soon?

- 1 Definitely yes
- 2 Probably yes
- 3 Probably not
- 4 Definitely not
- 8 DON'T KNOW
- 7 REFUSED

ASK: Respondents who have seen or heard of but never used e-cigarettes (YE1001 = 1 AND YE1002 = 2, -8 or -7).

**PATH ID: YE1105**

If one of your best friends were to offer you an e-cigarette, would you use it?

- 1 Definitely yes GO TO YE1191
- 2 Probably yes GO TO YE1191
- 3 Probably not GO TO YE1191
- 4 Definitely not GO TO YE1191
- 8 DON'T KNOW GO TO YE1191
- 7 REFUSED GO TO YE1191

ASK: Respondents who have seen or heard of but never used e-cigarettes (YE1001 = 1 AND YE1002 = 2, -8 or -7).

**PATH ID: YE1005**

How many disposable e-cigarettes or e-cigarette cartridges have you used in your entire life?

- 1 1 or more puffs but never a whole one
- 2 1
- 3 2 to 10
- 4 11 to 20
- 5 21 to 50
- 6 51 to 99
- 7 100 or more
- 8 DON'T KNOW
- 7 REFUSED

ASK: Respondents who have tried an e-cigarette (YE1002 = 1)

**PATH ID: YE1090**

Do you own an e-cigarette?

- 1 Yes
- 2 No
- 8 DON'T KNOW
- 7 REFUSED

ASK: Respondents who have tried an e-cigarette (YE1002 = 1)

## Final Youth Baseline Questionnaire - English

**PATH ID: YE1191**

Do any of your parents or guardians own an e-cigarette?

- 1 Yes
- 2 No
- 8 DON'T KNOW
- 7 REFUSED

ASK: Respondents who have seen or heard of e-cigarettes (YE1001 = 1).

GO TO: If respondent has never used an e-cigarette (YE1002 = 2, -8 or -7), GO TO YE1124.

Else go to YE1006

**PATH ID: YE1006**

How old were you when you first tried an e-cigarette, even one or two times?

- 1 |\_\_|\_\_| GO TO YE1108
- 8 DON'T KNOW
- 7 REFUSED

ASK: Respondents who have tried an e-cigarette (YE1002 = 1)

DISPLAY: Display "Years old" as a title.

**PATH ID: YE1120**

When you first tried an e-cigarette, even one or two times, were you...

- 1 Less than 12 years old,
- 2 12 to 14 years old, or
- 3 15 to 17 years old?
- 8 DON'T KNOW
- 7 REFUSED

ASK: All respondents who refused to give or did not know age (YE1006=DK,R)

**PATH ID: YE1108**

Was the first e-cigarette you used flavored to taste like menthol, mint, clove, spice, candy, fruit, chocolate, alcohol (such as wine or cognac), or other sweets?

- 1 Yes
- 2 No
- 8 DON'T KNOW
- 7 REFUSED

ASK: Respondents who have tried an e-cigarette (YE1002 = 1)

## Final Youth Baseline Questionnaire - English

**PATH ID: YE1112**

When did you last use an e-cigarette, even on or two times?

- |    |                                                           |              |
|----|-----------------------------------------------------------|--------------|
| 1  | Earlier today                                             |              |
| 2  | Not today but sometime in the past 7 days                 |              |
| 3  | Not in the past 7 days but sometime in the past 30 days   |              |
| 4  | Not in the past 30 days but sometime in the past 6 months | GO TO YE1124 |
| 5  | Not in the past 6 months but sometime in the past year    | GO TO YE1124 |
| 6  | 1 to 4 years ago                                          | GO TO YE1124 |
| 7  | 5 or more years ago                                       | GO TO YE1124 |
| -8 | DON'T KNOW                                                | GO TO YE1124 |
| -7 | REFUSED                                                   | GO TO YE1124 |

ASK: Respondents who have tried an e-cigarette (YE1002 = 1)

PROGRAM:

CREATE VARIABLES:

**PAST30DAY\_ECIGS (Past 30 Day Users)**

PAST30DAY\_ECIGS = 1 Yes, if respondent has used an e-cigarette within the past 30 days (YE1112=1 or 2 or 3).

Else PAST30DAY\_ECIGS = 2 No.

**PAST30DAY\_VL\_ECIGS (Past 30 Day Very Light Users)**

PAST30DAY\_VL\_ECIGS = 1 Yes, if respondent has used 1 or more puffs of an e-cigarette in lifetime (YE1005=1) AND last used an e-cigarette in the past 30 days (YE1112=1 or 2 or 3).

Else PAST30DAY\_VL\_ECIGS = 2 No.

**PAST30DAY\_NL\_ECIGS (Past 30 Day Not Light Users)**

PAST30DAY\_NL\_ECIGS = 1 Yes, if respondent has used 1 or more e-cigarettes in lifetime (YE1005 > 1) AND last used an e-cigarette within the past 30 days (YE1112=1 or 2 or 3).

Else PAST30DAY\_NL\_ECIGS = 2 No.

**PATH ID: YE9005**

Please think about the e-cigarette you use most of the time.

Is your e-cigarette rechargeable?

- |    |            |              |
|----|------------|--------------|
| 1  | Yes        |              |
| 2  | No         | GO TO YE9009 |
| -8 | DON'T KNOW |              |
| -7 | REFUSED    |              |

ASK: If respondent has used e-cigarettes in the past 30 days (PAST30DAY\_NL\_ECIGS = 1)



## Final Youth Baseline Questionnaire - English

**PATH ID: YE9008**

Does your e-cigarette use cartridges?

- 1 Yes
- 2 No
- 8 DON'T KNOW
- 7 REFUSED

ASK: Respondents who have used e-cigarettes in the past 30 days (PAST30DAY\_NL\_ECIGS = 1) whose e-cigarettes are rechargeable (YE9005=1, -8 or -7).

**PATH ID: YE9009**

Can you refill your [e-cigarette | e-cigarette cartridges] with "e-liquid"?

- 1 Yes
- 2 No
- 8 DON'T KNOW
- 7 REFUSED

ASK: Respondents who have used e-cigarettes in the past 30 days (PAST30DAY\_NL\_ECIGS = 1)  
PROGRAM: If YE9005 = 2 OR if YE9008=2, DK or RF, display "e-cigarette"; if YE9008=1, display "e-cigarette cartridges".

### **PROGRAM: [ECIGFILL] Series**

If respondent reports using e-cigarettes with cartridges (YE9008)=1, fill [ECIGFILL] with "e-cigarette cartridges". Else, fill [ECIGFILL] with "e-cigarettes".

**PATH ID: YE1022**

In the past 30 days, on how many days did you use an e-cigarette?

- 1 |\_\_|
- 8 DON'T KNOW
- 7 REFUSED

ASK: Respondents who have used an e-cigarette in the past 30 days (PAST30DAY\_ECIGS = 1)  
PROGRAM: Range check: 1-30 days

## Final Youth Baseline Questionnaire - English

**PATH ID: YE1023**

In the past 30 days, on the days you used an e-cigarette, how many [ECIGFILL] did you use per day?

- 1 Less than 1 [ECIGFILL] per day
- 2 1 [ECIGFILL] per day
- 3 2 to 5 [ECIGFILL] per day
- 4 6 to 10 [ECIGFILL] per day
- 5 11 to 20 [ECIGFILL] per day
- 6 More than 20 [ECIGFILL] per day
- 8 DON'T KNOW
- 7 REFUSED

ASK: Respondents who have used e-cigarettes in the past 30 days (PAST30DAY\_ECIGS = 1)

PROGRAM: For options 1 and 2, do not display 's' in [ECIGFILL]

**PATH ID: YE1130**

In the past 30 days, were any of the [ECIGFILL] you used flavored to taste like menthol, mint, clove, spice, candy, fruit, chocolate, alcohol (such as wine or cognac), or other sweets?

- 1 Yes
- 2 No
- 8 DON'T KNOW
- 7 REFUSED

ASK: Respondents who have used e-cigarettes in the past 30 days (PAST30DAY\_ECIGS = 1).

**PATH ID: YE1123**

In the past 30 days, did anyone refuse to sell you [ECIGFILL][ or e-liquid] because of your age?

- 1 Yes
- 2 No
- 3 I did not try to buy [ECIGFILL][ or e-liquid] in the past 30 days
- 8 DON'T KNOW
- 7 REFUSED

ASK: Respondents who have used e-cigarettes in the past 30 days (PAST30DAY\_ECIGS = 1).

PROGRAM: If YE9009=1, display "or e-liquid".

## Final Youth Baseline Questionnaire - English

**PATH ID: YE1118**

In the past 30 days, how did you usually get your own [ECIGFILL][ and e-liquid]?

- |    |                                              |              |
|----|----------------------------------------------|--------------|
| 1  | I bought them myself                         |              |
| 2  | I gave someone else money to buy them for me | GO TO YE1030 |
| 3  | I asked someone to give me one               | GO TO YE1047 |
| 4  | Someone offered it to me                     | GO TO YE1047 |
| 5  | I bought them from another person            | GO TO YE1047 |
| 6  | I took them from a store or another person   | GO TO YE1047 |
| 7  | I got them some other way                    | GO TO YE1047 |
|    | SPECIFY _____                                |              |
| -8 | DON'T KNOW                                   | GO TO YE1047 |
| -7 | REFUSED                                      | GO TO YE1047 |

ASK: Respondents who have used e-cigarettes in the past 30 days (PAST30DAY\_ECIGS = 1).

PROGRAM: If YE9009=1, display "and e-liquid".

If OS field selected and additional OS screen is shown, display question text and add the following text: "Please type your answer using the computer keyboard."

GO TO: If PAST30DAY\_VL\_ECIGS=1, go to Box YE2

Else go to YE1097.

**PATH ID: YE1097**

In the past 30 days, did you use a coupon when buying [ECIGFILL][ and e-liquid]?

- |    |            |              |
|----|------------|--------------|
| 1  | Yes        |              |
| 2  | No         | GO TO YE1030 |
| -8 | DON'T KNOW | GO TO YE1030 |
| -7 | REFUSED    | GO TO YE1030 |

ASK: Respondents who have used an e-cigarette in the past 30 days (PAST30DAY\_NL\_ECIGS = 1) AND tried to buy e-cigarettes in the past 30 days (YE1123 NE 3) AND bought e-cigarettes themselves in the past 30 days (YE1118=1)

PROGRAM: If YE9009=1, display "and e-liquid".

**PATH ID: YE1098**

How many times in the past 30 days have you used a coupon to buy [ECIGFILL][ and e-liquid]?

- |    |            |  |
|----|------------|--|
| 1  | I__I__I    |  |
| -8 | DON'T KNOW |  |
| -7 | REFUSED    |  |

ASK: Respondents who have used an e-cigarette in the past 30 days (PAST30DAY\_NL\_ECIGS = 1) AND used a coupon in the past 30 days (YE1097 = 1)

PROGRAM: If YE9009=1, display "and e-liquid".

## Final Youth Baseline Questionnaire - English

**PATH ID: YE1030**

How do [you/they] usually buy your [ECIGFILL][ and e-liquid]? Is it...

- |    |                   |              |
|----|-------------------|--------------|
| 1  | In person         |              |
| 2  | From the internet | GO TO YE1047 |
| 3  | By telephone      | GO TO YE1047 |
| -8 | DON'T KNOW        | GO TO YE1047 |
| -7 | REFUSED           | GO TO YE1047 |

ASK: Respondents who have used an e-cigarette in the past 30 days (PAST30DAY\_NL\_ECIGS = 1) AND indicated that they bought e-cigarettes for themselves or that someone else bought e-cigarettes for them in the past 30 days (YE1118 = 1 or 2).

PROGRAM: If YE1118=1, display "you"; If YE1118=2, display "they". If YE9009=1, display "and e-liquid".

**PATH ID: YE1032**

Do [you/they] usually buy [ECIGFILL][ and e-liquid]...

- |    |                   |
|----|-------------------|
| 1  | In your own state |
| 2  | In another state  |
| 3  | Outside the US    |
| -8 | DON'T KNOW        |
| -7 | REFUSED           |

ASK: Respondents who have used an e-cigarette in the past 30 days (PAST30DAY\_NL\_ECIGS = 1) AND indicated that the e-cigarettes they bought or that someone else bought for them were purchased in person (YE1030= 1).

PROGRAM: If YE1118=1, display "you"; If YE1118=2, "they". If YE9009=1, display "and e-liquid".

## Final Youth Baseline Questionnaire - English

**PATH ID: YE1033**

Where do [you/they] buy your [ECIGFILL][ and e-liquid] most of the time?

- 1 A mall kiosk
- 2 A convenience store or gas station
- 3 A supermarket, grocery store, or drug store
- 4 A warehouse club, such as Sam's or Costco
- 5 A smoke shop, tobacco specialty store or tobacco outlet store
- 6 A duty free shop or military commissary
- 7 A bar, pub, restaurant or casino
- 8 A friend or relative [DISPLAY IF YE1118 = 1]
- 9 A swap meet or flea market
- 10 Or from somewhere else SPECIFY: \_\_\_\_\_
- 8 DON'T KNOW
- 7 REFUSED

ASK: Respondents who have used an e-cigarette in the past 30 days (PAST30DAY\_NL\_ECIGS = 1) AND indicated that the e-cigarettes they bought or that someone else bought for them were purchased in person (YE1030 = 1).

PROGRAM: If YE1118=1, display "you"; If YE1118=2, "they". If YE9009=1, display "and e-liquid".

If YE1118=1, display option 8=' A friend or relative,' if YE1118 NE 1, hide option 8.

If OS field selected and additional OS screen is shown, display question text and add the following text: "Please type your answer using the computer keyboard."

**PATH ID: YE1047**

Do you have a regular brand of e-cigarettes that you usually use?

- 1 Yes
- 2 No
- 8 DON'T KNOW
- 7 REFUSED

ASK: Respondents who have used an e-cigarette in the past 30 days (PAST30DAY\_NL\_ECIGS = 1) AND have used e-cigarettes in the past 30 days (YE1022 > 0 OR YE1112 = 1, 2 or 3).

## Final Youth Baseline Questionnaire - English

**PATH ID: YE1048**

What brand of e-cigarette [do I did] you [usually I last] use? Please select it from the choices below by touching the screen. [ If you do not see it below, touch the button marked "NEXT". I If you do not see it below, touch the box marked "Something else." ]

**PROGRAM:**

[If multiple screens] Display: If you do not see it below, touch the button marked "NEXT".

[If single screen OR last screen of multiple screens] Display: If you do not see it below, touch the box marked "Something else".

[SHOW PICTURES OF THE MAJOR BRANDS ON THE TOUCHSCREEN. WHEN A RESPONDENT SELECTS A BRAND, GO TO BOX YE2]

- |    |                |              |
|----|----------------|--------------|
| 1  | Something else | GO TO YE1049 |
| -8 | DON'T KNOW     | GO TO YE1060 |
| -7 | REFUSED        | GO TO YE1060 |

ASK: Respondents who have used an e-cigarette in the past 30 days (PAST30DAY\_NL\_ECIGS = 1) AND have used an e-cigarette in the past 30 days (YE1022 > 0).

PROGRAM: If YE1047=1, display "do" and "usually". If YE1047=2, DK or RF, display "did" and "last"

**PATH ID: YE1049**

You said that your brand was not pictured. What is it?

- |    |            |              |
|----|------------|--------------|
| 1  | _____      |              |
| -8 | DON'T KNOW | GO TO YE1060 |
| -7 | REFUSED    | GO TO YE1060 |

ASK: Respondents who have used an e-cigarette in the past 30 days (PAST30DAY\_NL\_ECIGS = 1) AND did not select an image for brand (YE1048 = 1).

Box YE2

Display question YE1060, YE1061, YE1085, YE1062, YE1075, YE1063, YE1064, YE1065, YE1066, YE1067, YE1068, YE1069, YE1072 on one screen. Show the intro/transition text from YE1060 first, then show each item with a Y/N response. As each item is answered, show the next one.

PROGRAM: Randomize order of YE1060 through YE1072.

**PATH ID: YE1060**

The next questions are about the reasons people use e-cigarettes. Please select which reasons apply to you.

I use e-cigarettes because...

They are affordable.

- |    |            |
|----|------------|
| 1  | Yes        |
| 2  | No         |
| -8 | DON'T KNOW |
| -7 | REFUSED    |

ASK: Respondents who have used e-cigarettes in the past 30 days (PAST30DAY\_ECIGS = 1).

## Final Youth Baseline Questionnaire - English

**PATH ID: YE1061**

People in the media or other public figures use e-cigarettes.

- 1 Yes
- 2 No
- 8 DON'T KNOW
- 7 REFUSED

ASK: Respondents who have used e-cigarettes in the past 30 days (PAST30DAY\_ECIGS = 1).

**PATH ID: YE1085**

I can use e-cigarettes at times when or in places where smoking cigarettes isn't allowed.

- 1 Yes
- 2 No
- 8 DON'T KNOW
- 7 REFUSED

ASK: Respondents who have used e-cigarettes in the past 30 days (PAST30DAY\_ECIGS = 1).

**PATH ID: YE1062**

They might be less harmful to me than cigarettes.

- 1 Yes
- 2 No
- 8 DON'T KNOW
- 7 REFUSED

ASK: Respondents who have used e-cigarettes in the past 30 days (PAST30DAY\_ECIGS = 1).

**PATH ID: YE1075**

They might be less harmful to people around me than cigarettes.

- 1 Yes
- 2 No
- 8 DON'T KNOW
- 7 REFUSED

ASK: Respondents who have used e-cigarettes in the past 30 days (PAST30DAY\_ECIGS = 1).

**PATH ID: YE1063**

[ECIGFILL] come in flavors I like.

- 1 Yes
- 2 No
- 8 DON'T KNOW
- 7 REFUSED

ASK: Respondents who have used e-cigarettes in the past 30 days (PAST30DAY\_ECIGS = 1).

## Final Youth Baseline Questionnaire - English

**PATH ID: YE1064**

Using e-cigarettes helps people to quit smoking cigarettes.

- 1 Yes
- 2 No
- 8 DON'T KNOW
- 7 REFUSED

ASK: Respondents who have used e-cigarettes in the past 30 days (PAST30DAY\_ECIGS = 1).

**PATH ID: YE1065**

E-cigarettes don't smell.

- 1 Yes
- 2 No
- 8 DON'T KNOW
- 7 REFUSED

ASK: Respondents who have used e-cigarettes in the past 30 days (PAST30DAY\_ECIGS = 1).

**PATH ID: YE1066**

Using an e-cigarette feels like smoking a regular cigarette.

- 1 Yes
- 2 No
- 8 DON'T KNOW
- 7 REFUSED

ASK: Respondents who have used e-cigarettes in the past 30 days (PAST30DAY\_ECIGS = 1).

**PATH ID: YE1067**

E-cigarettes don't bother non-tobacco users.

- 1 Yes
- 2 No
- 8 DON'T KNOW
- 7 REFUSED

ASK: Respondents who have used e-cigarettes in the past 30 days (PAST30DAY\_ECIGS = 1).

**PATH ID: YE1068**

People who are important to me use e-cigarettes.

- 1 Yes
- 2 No
- 8 DON'T KNOW
- 7 REFUSED

ASK: Respondents who have used e-cigarettes in the past 30 days (PAST30DAY\_ECIGS = 1).



## Final Youth Baseline Questionnaire - English

**PATH ID: YE1069**

I like socializing while using an e-cigarette.

- 1 Yes
- 2 No
- 8 DON'T KNOW
- 7 REFUSED

ASK: Respondents who have used e-cigarettes in the past 30 days (PAST30DAY\_ECIGS = 1).

**PATH ID: YE1072**

The advertising for e-cigarettes appeals to me.

- 1 Yes
- 2 No
- 8 DON'T KNOW
- 7 REFUSED

ASK: Respondents who have used e-cigarettes in the past 30 days (PAST30DAY\_ECIGS = 1).

**PATH ID: YE1086**

In the past 30 days, have you used an e-cigarette at times when or in places where you could not smoke regular cigarettes?

- 1 Yes
- 2 No
- 8 DON'T KNOW
- 7 REFUSED

ASK: Respondents who have used e-cigarettes in the past 30 days (PAST30DAY\_ECIGS = 1) AND who have also smoked cigarettes in the past 30 days (PAST30DAY\_CIGS = 1).

**PATH ID: YE1124**

How likely is someone to become addicted to e-cigarettes?

- 1 Very unlikely
- 2 Somewhat unlikely
- 3 Neither likely nor unlikely
- 4 Somewhat likely
- 5 Very likely
- 8 DON'T KNOW
- 7 REFUSED

ASK: Respondents who have seen or heard of e-cigarettes (YE1001 = 1).

## Final Youth Baseline Questionnaire - English

**PATH ID: YE1099**

Is using e-cigarettes less harmful, about the same, or more harmful than smoking cigarettes?

- 1 Less harmful
- 2 About the same
- 3 More harmful
- 8 DON'T KNOW
- 7 REFUSED

ASK: Respondents who have seen or heard of e-cigarettes (YE1001 = 1).

**PATH ID: YE1125**

How much do you think people harm themselves when they use e-cigarettes?

- 1 No harm
- 2 Little harm
- 3 Some harm
- 4 A lot of harm
- 8 DON'T KNOW
- 7 REFUSED

ASK: Respondents who have seen or heard of e-cigarettes (YE1001 = 1).

**PATH ID: YE1146**

Some e-cigarettes come in flavors like menthol, mint, clove, spice, candy, fruit, chocolate, alcohol (such as wine or cognac), or other sweets.

Are flavored e-cigarettes easier to use, about the same, or harder to use than unflavored e-cigarettes?

- 1 Easier to use
- 2 About the same
- 3 Harder to use
- 8 DON'T KNOW
- 7 REFUSED

ASK: Respondents who have seen or heard of e-cigarettes (YE1001 = 1).

## Final Youth Baseline Questionnaire - English

### CIGAR SECTION

**PATH ID: BOX YG1**

The next questions are about **traditional cigars**, **cigarillos**, and **filtered cigars**. These products go by lots of different names, so please use these descriptions and photos to understand what they are.

**Traditional cigars** contain tightly rolled tobacco that is wrapped in a tobacco leaf. Some common brands of cigars include Macanudo, Romeo y Julieta, and Arturo Fuente, but there are many others.

SHOW GENERIC IMAGE OF TRADITIONAL CIGARS

**PATH ID: BOX YG2**

**Cigarillos** and **filtered cigars** are smaller than traditional cigars. They are usually brown. Some are the same size as cigarettes, and some come with tips or filters. Some common brands are Black & Mild, Swisher Sweets, Dutch Masters, Phillies Blunts, Prime Time, and Winchester.

SHOW GENERIC IMAGES OF CIGARILLOS AND FILTERED CIGARS

**PATH ID: YG9101**

Have you ever seen or heard of a cigar, cigarillo, or filtered cigar before this study?

- |    |            |               |
|----|------------|---------------|
| 1  | Yes        |               |
| 2  | No         | GO TO BOX YP1 |
| -8 | DON'T KNOW | GO TO BOX YP1 |
| -7 | REFUSED    | GO TO BOX YP1 |

ASK: All respondents.

SHOW GENERIC IMAGE OF TRADITIONAL CIGARS, CIGARILLOS AND FILTERED CIGARS

**BOX – DISPLAY INSTRUCTIONS**

For YG9002, display a “Yes” and “No” column with options for each response category.

**PATH ID: YG9002**

Which type of cigar have you heard of before this study?

- |    |                                                                                                                                    |         |
|----|------------------------------------------------------------------------------------------------------------------------------------|---------|
| 1  | Traditional cigars like Macanudo, Romeo y Julieta, Arturo Fuente, or others                                                        |         |
| 2  | Cigarillos or filtered cigars like Black & Mild, Swisher Sweets, Dutch Masters, Phillies Blunts, Prime Time, Winchester, or others |         |
| -8 | DON'T KNOW                                                                                                                         | BOX YP1 |
| -7 | REFUSED                                                                                                                            | BOX YP1 |

ASK: Respondents who have seen or heard of a cigar, cigarillo or filtered cigar (YG9101=1)

**PATH ID: BOX YG5**

PROGRAM: If never seen or heard of traditional cigars, cigarillos, or filtered cigars (YG9101 = 2, -8, or -7) OR ((YG9002 NOT IN (1, 2)), GO TO BOX YP1.

## Final Youth Baseline Questionnaire - English

**PATH ID: YG1002**

Have you ever smoked a traditional cigar, cigarillo, or filtered cigar, even one or two puffs?

- |    |            |              |
|----|------------|--------------|
| 1  | Yes        | GO TO YG9104 |
| 2  | No         |              |
| -8 | DON'T KNOW |              |
| -7 | REFUSED    |              |

ASK: Respondents who have seen or heard of cigars, cigarillos, or filtered cigars (YG9101 = 1)  
PROGRAM: DISPLAY GENERIC IMAGE OF CIGARS, CIGARILLOS AND FILTERED CIGARS

**PATH ID: YG1103**

Have you ever been curious about smoking a traditional cigar, cigarillo or filtered cigar?

- |    |                    |
|----|--------------------|
| 1  | Very curious       |
| 2  | Somewhat curious   |
| 3  | A little curious   |
| 4  | Not at all curious |
| -8 | DON'T KNOW         |
| -7 | REFUSED            |

ASK: Respondents who seen or have heard of any cigar but have not tried one ((YG9101 = 1) AND YG1002 = 2, -8 or -7).

**PATH ID: YG1104**

Do you think that you will try a traditional cigar, cigarillo or filtered cigar soon?

- |    |                |
|----|----------------|
| 1  | Definitely yes |
| 2  | Probably yes   |
| 3  | Probably not   |
| 4  | Definitely not |
| -8 | DON'T KNOW     |
| -7 | REFUSED        |

ASK: Respondents who have seen or heard of any cigar but have not tried one ((YG9101 = 1) AND YG1002 = 2, -8 or -7).

**PATH ID: YG1105**

If one of your best friends were to offer you a traditional cigar, cigarillo or filtered cigar, would you smoke it?

- |    |                |              |
|----|----------------|--------------|
| 1  | Definitely yes | GO TO YG9105 |
| 2  | Probably yes   | GO TO YG9105 |
| 3  | Probably not   | GO TO YG9105 |
| 4  | Definitely not | GO TO YG9105 |
| -8 | DON'T KNOW     | GO TO YG9105 |
| -7 | REFUSED        | GO TO YG9105 |

ASK: Respondents who have seen or heard of any cigar but have not tried one ((YG9101 = 1) AND YG1002 = 2, -8 or -7).

## Final Youth Baseline Questionnaire - English

### BOX – DISPLAY INSTRUCTIONS

For YG9104, display a “Yes” and “No” column with options for each response category.

#### PATH ID: YG9104

Which type of cigar have you ever smoked?

- 1 Traditional cigars like Macanudo, Romeo y Julieta, Arturo Fuente, or others
- 2 Cigarillos or filtered cigars like Black & Mild, Swisher Sweets, Dutch Masters, Phillies Blunts, Prime Time, Winchester, or others
- 8 DON'T KNOW
- 7 REFUSED

ASK: Respondents who have smoked a cigar, cigarillo or filtered cigar (YG1002 =1).

#### PATH ID: YG9105

Sometimes people take tobacco out of a cigar, cigarillo or filtered cigar and replace it with marijuana. This is sometimes called a “blunt”.

Have you ever smoked part or all of a cigar, cigarillo or filtered cigar with marijuana in it?

- 1 Yes
- 2 No
- 8 DON'T KNOW
- 7 REFUSED

ASK: Respondents who have seen or heard of cigars, cigarillos, or filtered cigars (YG9101 = 1 AND AND (YG9002 IN (1 or 2))

GO TO: If respondent has ever smoked a blunt (YG9105 = 1), go to YG9107

If R has never smoked a cigar or blunt (YG1002=2, -8 or -7 AND YG9105=2, -8 or -7) OR R has smoked a cigar but does not specify type (YG1002=1 AND YG9104 not in (1,2)), go to YG1124. Else go to BOX YG3 for BLUNT/CIGARFILL variables.

#### PATH ID: YG9107

In the past 12 months, have you smoked part or all of a cigar, cigarillo or filtered cigar with marijuana in it?

- 1 Yes GO TO YG9106
- 2 No
- 8 DON'T KNOW
- 7 REFUSED

ASK: Respondents who have smoked cigars with marijuana (YG9105=1)

PROGRAM:

If R has smoked a blunt in the past 12 months (YG9107 = 1), go to YG9106

Else if R is a cigarillo or filtered cigar user (YG9104(2)=1), go to YG9009

Else if R is a traditional cigar user (YG9104(1)=1) go to BOX YG3

Else go to YG1124

## Final Youth Baseline Questionnaire - English

**PATH ID: YG9106**

In the past 12 months, when you smoked a cigar, cigarillo or filtered cigar, how often has tobacco been replaced with any marijuana?

- 1 Every time
- 2 Most of the time
- 3 Sometimes
- 4 Rarely
- 5 Never
- 8 DON'T KNOW
- 7 REFUSED

ASK: Respondents who have smoked cigars with marijuana in past 12 months (YG9107=1)

PROGRAM:

If R is a cigarillo or filtered cigar user (YG9104(2)=1), go to YG9009

Else R is a blunt-only cigar smoker (((YG1002=2 OR YG9104(1,2)=2) AND (YG9107=1)), go to YG9009

Else if R is a traditional cigar user (YG9104(1)=1) go to BOX YG3

Else go to YG1124

**PATH ID: YG9009**

Which of the following kinds of cigarillos or filtered cigars have you smoked[ as blunts]? Choose all that apply. The kind...

- 1 With a plastic or wooden tip
- 2 With a filter (like a cigarette filter)
- 3 Without a tip or filter
- 8 DON'T KNOW
- 7 REFUSED

ASK: Respondent who have ever smoked a cigarillo or filtered cigar ((YG9104(2)=1)) OR are blunt-only cigar smokers ((YG1002=2 OR YG9104(1,2)=2) AND (YG9107=1)).

PROGRAM: Display " as blunts" if blunt-only smoker ((YG1002=2 OR YG9104(1,2)=2) AND (YG9107=1)). Else do not display " as blunts".

DISPLAY GENERIC IMAGE OF CIGARILLOS WITH TIPS, FILTERED CIGARS, AND CIGARILLOS WITHOUT TIPS

## Final Youth Baseline Questionnaire - English

BOX YG3

PROGRAM:

CREATE VARIABLES:

**BLUNT\_ONLY\_GRILLO** – respondents that report never smoking any type of cigar, but report smoking cigarillos as blunts

BLUNT\_ONLY\_GRILLO=1 YES, if ((YG1002=2 OR YG9104(1,2)=2) AND (YG9107=1 AND YG9009=1 OR 3)).

Else BLUNT\_ONLY\_GRILLO=2 NO.

**BLUNT\_ONLY\_GFC** – respondents that report never smoking any type of cigar, but report smoking filtered cigars as blunts

BLUNT\_ONLY\_GFC=1 YES, if ((YG1002=2 OR YG9104(1,2)=2) AND (YG9107=1 AND YG9009=2)).

Else BLUNT\_ONLY\_GFC=2 NO.

**BLUNT\_ONLY\_UNKNOWN** – respondents that report never smoking a cigar, report smoking cigars as blunts, but do not specify type of cigar for blunts

BLUNT\_ONLY\_UNKNOWN=1 YES, if (((YG1002=2 OR YG9104(1,2)=2) AND (YG9107=1 AND YG9009 not in (1,2,3)));

Else BLUNT\_ONLY\_UNKNOWN=2 NO.

ROUTING:

If R is a cigarillo OR filtered cigar blunt smoker, ask a subset of items in the cigar section.

IF BLUNT\_ONLY\_GRILLO=1 OR BLUNT\_ONLY\_GFC=1, ONLY ASK ITEMS: YG1095, YG1108, YG1118, YG1030, YG1032, YG1033, YG1047, YG1048, YG1070, YG1049, YG1071, YG1124, YG1099, YG1125, and YG1146, following skips appropriately.

If R is a cigarillo AND filtered cigar blunt smoker, ask a subset of items in the cigar section, where some of those items are asked twice about each blunt cigar type.

IF BLUNT\_ONLY\_GRILLO=1 AND BLUNT\_ONLY\_GFC=1, CREATE LOOP. ASK ITEMS: (YG1095, YG1108, YG1118, YG1030, YG1032, YG1033, YG1047, YG1048, YG1070, YG1049, and YG1071) for cigarillo blunt smokers first. Then loop through items again for filtered cigar blunt smokers. Then ask YG1124, YG1099, YG1125 and YG1146 one time.

If R is a blunt smoker but cigar type is unknown, do not ask the subset of items about blunts.

IF BLUNT\_ONLY\_UNKNOWN=1, ONLY ASK ITEMS: YG1124, YG1099, YG1125, and YG1146.

PROGRAM: IF BLUNT\_ONLY\_UNKNOWN=1, go directly to YG1124

If BLUNT\_ONLY\_GRILLO=1 OR BLUNT\_ONLY\_GFC=1, go to CIGARFILL SERIES for transition text display instructions then directly to YG1095

Else go to PROGRAM CIGARFILL SERIES.

## Final Youth Baseline Questionnaire - English

### PROGRAM: [CIGARFILL] SERIES

Create [CIGARFILL] and repeat series (YG1005 TO YG1146) for each product that the respondent has indicated that he or she used in questions YG9104 and YG9009. If cigar type is unknown after YG9009 ((YG9104(2) = 1 and YG9009 <> 1, 2, or 3)), go to YG1124.

Create [CIGARFILL]. If YG9104(1)=1, fill [CIGARFILL] with "cigar"; if YG9104(2)=1 AND (YG9009=1 OR 3), fill [CIGARFILL] with "cigarillo"; if YG9104(2)=1 AND YG9009=2, fill [CIGARFILL] with "filtered cigar".

Repeat the rest of the section once for each type of cigar the respondent has used (cigars, cigarillos, filtered cigars). Display text below as follows:

DISPLAY THE FOLLOWING TEXT EACH TIME THEY REPEAT THE REST OF THE SECTION. ADD THE LAST SENTENCE ONLY IF THEY STILL HAVE ANOTHER CIGARFILL TO ANSWER QUESTIONS ABOUT.

The next questions are about [[CIGARFILL]s | cigarillos | filtered cigars], like those shown below. As you answer these questions, please think **ONLY** about your use of [[**CIGARFILL**]s | **cigarillos** when smoked as **blunts** | **filtered cigars** when smoked as **blunts**]. [SHOW GENERIC IMAGE FOR CIGARFILL].

[ONLY IF THIS IS NOT THE LAST TIME THROUGH THE SECTION]. There will be a separate section later about other kinds of cigars.

[DISPLAY: If BLUNT\_ONLY\_GRILLO=1, display 'cigarillos' and 'cigarillos when smoked as blunts'. If BLUNT\_ONLY\_GFC=1, display 'filtered cigars' and 'filtered cigars when smoked as blunts'. Else, display [CIGARFILL]s as specified.

### PATH ID: YG1005

How many [CIGARFILL]s have you smoked in your entire life?

- 1 1 or more puffs but never a whole one
- 2 1
- 3 2 to 10
- 4 11 to 20
- 5 21 to 50
- 6 51 to 99
- 7 100 or more
- 8 DON'T KNOW
- 7 REFUSED

ASK: Respondents who have smoked a [CIGARFILL] (YG1002 =1).



## Final Youth Baseline Questionnaire - English

**PATH ID: YG1095**

Please look at this picture. Which group is most like the [[CIGARFILL] | cigarillo | filtered cigar] you usually smoke[ as a blunt]?

- 1 Group 1
- 2 Group 2
- 3 Group 3
- 4 Group 4
- 8 DON'T KNOW
- 7 REFUSED

ASK: Respondents who have smoked a [CIGARFILL] (YG1002 =1) OR are blunt-only cigar smokers (BLUNT\_ONLY\_GRILLO=1 OR BLUNT\_ONLY\_GFC=1).

PROGRAM: If BLUNT\_ONLY\_GRILLO=1, display "cigarillo" and "as a blunt". If BLUNT\_ONLY\_GFC=1, display "filtered cigar" and "as a blunt". Else, display "[CIGARFILL]".

DISPLAY IMAGE OF CIGARS WITH SCALE

GO TO: If BLUNT\_ONLY\_GRILLO=1 OR BLUNT\_ONLY\_GFC=1, go to YG1108

Else go to YG1006.

**PATH ID: YG1006**

How old were you when you first tried a [CIGARFILL], even one or two puffs?

- 1 |\_\_|\_\_| GO TO YG1108
- 8 DON'T KNOW
- 7 REFUSED

ASK: Respondents who have smoked a [CIGARFILL] (YG1002 =1).

DISPLAY: Display "Years old" as a title.

**PATH ID: YG1120**

When you first tried a [CIGARFILL], even one or two puffs, were you...

- 1 Less than 12 years old,
- 2 12 to 14 years old, or
- 3 15 to 17 years old?
- 8 DON'T KNOW
- 7 REFUSED

ASK: All respondents who refused to give or did not know age (YG1006=-8 OR -7)

## Final Youth Baseline Questionnaire - English

**PATH ID: YG1108**

Was the first [[CIGARFILL] you smoked I cigarillo you smoked as a blunt I filtered cigar you smoked as a blunt] flavored to taste like menthol, mint, clove, spice, candy, fruit, chocolate, alcohol (such as wine or cognac), or other sweets?

- 1 Yes
- 2 No
- 8 DON'T KNOW
- 7 REFUSED

ASK: Respondents who have smoked a [CIGARFILL] (YG1002 =1) OR are blunt-only cigar smokers (BLUNT\_ONLY\_GRILLO=1 OR BLUNT\_ONLY\_GFC=1)

PROGRAM: If BLUNT\_ONLY\_GRILLO=1, display "cigarillo you smoked as a blunt". If BLUNT\_ONLY\_GFC=1, display "filtered cigar you smoked as a blunt". Else, display "[CIGARFILL] you smoked".

GO TO: If BLUNT\_ONLY\_GRILLO=1 OR BLUNT\_ONLY\_GFC=1, go to YG1030.

**PATH ID: YG1112**

When was the last time you smoked a [CIGARFILL], even one or two puffs?

- 1 Earlier today
- 2 Not today but sometime in the past 7 days
- 3 Not in the past 7 days but sometime in the past 30 days
- 4 Not in the past 30 days but sometime in the past 6 months GO TO YG1124
- 5 Not in the past 6 months but sometime in the past year GO TO YG1124
- 6 1 to 4 years ago GO TO YG1124
- 7 5 or more years ago GO TO YG1124
- 8 DON'T KNOW GO TO YG1124
- 7 REFUSED GO TO YG1124

ASK: Respondents who have smoked a [CIGARFILL] (YG1002 =1).

## Final Youth Baseline Questionnaire - English

PROGRAM:

CREATE VARIABLES FOR EACH CIGAR TYPE:

### **PAST30DAY\_[CIGARFILL] (Past 30 Day Users)**

PAST30DAY\_[CIGARFILL] = 1 Yes, if respondent has smoked a [CIGARFILL] within the past 30 days (YG1112=1 or 2 or 3).

Else PAST30DAY\_[CIGARFILL]= 2 No.

### **PAST30DAY\_VL\_[CIGARFILL] (Past 30 Day Very Light Users)**

PAST30DAY\_VL\_[CIGARFILL]= 1 Yes, if respondent has smoked less than 10 [CIGARFILL]s in lifetime (YG1005=1 or 2 or 3) AND last smoked a [CIGARFILL] in the past 30 days (YG1112=1 or 2 or 3).

Else PAST30DAY\_VL\_[CIGARFILL]= 2 No.

### **PAST30DAY\_NL\_[CIGARFILL] (Past 30 Day Not Light Users)**

PAST30DAY\_NL\_[CIGARFILL]= 1 Yes, if respondent has smoked more than 10 [CIGARFILL]s in lifetime (YG1005 > 3) AND last smoked a [CIGARFILL] within the past 30 days (YG1112=1 or 2 or 3).

Else PAST30DAY\_NL\_[CIGARFILL]= 2 No.

### **PATH ID: YG1022**

In the past 30 days, on how many days did you smoke a [CIGARFILL]?

1    |\_\_|\_\_|

-8    DON'T KNOW

-7    REFUSED

ASK: Respondents who have smoked a [CIGARFILL] in the past 30 days (PAST30DAY\_[CIGARFILL] = 1)

PROGRAM: Range check: 1-30 days

### **PATH ID: YG1023**

In the past 30 days, on the days you smoked a [CIGARFILL], how many [CIGARFILL]s did you smoke per day?

1    Less than 1 [CIGARFILL] per day

2    1 [CIGARFILL] per day

3    2 to 5 [CIGARFILL]s per day

4    6 to 10 [CIGARFILL]s per day

5    11 to 20 [CIGARFILL]s per day

6    More than 20 [CIGARFILL]s per day

-8    DON'T KNOW

-7    REFUSED

ASK: Respondents who have smoked a [CIGARFILL] in the past 30 days (PAST30DAY\_[CIGARFILL] = 1).

## Final Youth Baseline Questionnaire - English

**PATH ID: YG1130**

In the past 30 days, were any of the [CIGARFILL]s that you smoked flavored to taste like menthol, mint, clove, spice, candy, fruit, chocolate, alcohol (such as wine or cognac), or other sweets?

- 1 Yes
- 2 No
- 8 DON'T KNOW
- 7 REFUSED

ASK: Respondents who have smoked a [CIGARFILL] in the past 30 days (PAST30DAY\_[CIGARFILL] = 1).

**PATH ID: YG1123**

In the past 30 days, did anyone refuse to sell you [CIGARFILL]s because of your age?

- 1 Yes
- 2 No
- 3 I did not try to buy [CIGARFILL]s in the past 30 days
- 8 DON'T KNOW
- 7 REFUSED

ASK: Respondents who have smoked a [CIGARFILL] in the past 30 days (PAST30DAY\_[CIGARFILL] = 1).

## Final Youth Baseline Questionnaire - English

**PATH ID: YG1118**

In the past 30 days, how did you usually get your own [[CIGARFILL]s I cigarillos for when you smoke blunts I filtered cigars for when you smoke blunts]?

- |    |                                                                                               |              |
|----|-----------------------------------------------------------------------------------------------|--------------|
| 1  | I bought them myself                                                                          |              |
| 2  | I gave someone else money to buy them for me                                                  | GO TO YG1030 |
| 3  | I asked someone to give me one                                                                | GO TO YG1047 |
| 4  | Someone offered it to me                                                                      | GO TO YG1047 |
| 5  | I bought them from another person                                                             | GO TO YG1047 |
| 6  | I took them from a store or another person                                                    | GO TO YG1047 |
| 7  | I got them some other way                                                                     | GO TO YG1047 |
|    | SPECIFY _____                                                                                 |              |
| 8  | I did not smoke a blunt in the past 30 days (ONLY DISPLAY THIS OPTION FOR BLUNT-ONLY SMOKERS) | GO TO YG1047 |
| -8 | DON'T KNOW                                                                                    | GO TO YG1047 |
| -7 | REFUSED                                                                                       | GO TO YG1047 |

ASK: Respondents who have smoked a [CIGARFILL] in the past 30 days (PAST30DAY\_[CIGARFILL] = 1).

PROGRAM: If BLUNT\_ONLY\_GRILLO=1, display "cigarillos for when you smoke blunts". If BLUNT\_ONLY\_GFC=1 display "filtered cigars for when you smoke blunts".

Display Option 8 for blunt users only (if BLUNT\_ONLY\_GRILLO=1 OR BLUNT\_ONLY\_GFC=1). Do not display Option 8 for CIGARFILL series.

If OS field selected and additional OS screen is shown, display question text and add the following text: "Please type your answer using the computer keyboard."

GO TO: If PAST30DAY\_VL\_[CIGARFILL]=1, go to Box YG6

If BLUNT\_ONLY\_GRILLO=1 or BLUNT\_ONLY\_GFC=1 AND YG1118=1 or 2, go to YG1030

If BLUNT\_ONLY\_GRILLO=1 or BLUNT\_ONLY\_GFC=1 AND YG1118 not in (1,2), go to YG1047

Else go to YG1097.

**PATH ID: YG1097**

In the past 30 days, did you use a coupon when buying [CIGARFILL]s?

- |    |            |              |
|----|------------|--------------|
| 1  | Yes        |              |
| 2  | No         | GO TO YG1030 |
| -8 | DON'T KNOW | GO TO YG1030 |
| -7 | REFUSED    | GO TO YG1030 |

ASK: Respondents who have smoked a [CIGARFILL] in the past 30 days (PAST30DAY\_NL\_[CIGARFILL] = 1) AND tried to buy [CIGARFILL]s in the past 30 days (YG1123 NE 3) AND bought [CIGARFILL]s themselves in the past 30 days (YG1118=1)

## Final Youth Baseline Questionnaire - English

**PATH ID: YG1098**

How many times in the past 30 days have you used a coupon to buy [CIGARFILL]s?

- 1 | | |
- 8 DON'T KNOW
- 7 REFUSED

ASK: Respondents who have smoked a [CIGARFILL] in the past 30 days (PAST30DAY\_NL\_[CIGARFILL] = 1) AND used a coupon in the past 30 days (YG1097 = 1)

**PATH ID: YG1030**

How do [you/they] usually buy [your [CIGARFILL]s | cigarillos for when you smoke blunts | filtered cigars for when you smoke blunts? Is it...

- 1 In person (such as at a store or cigar bar)
- 2 From the internet GO TO YG1047
- 3 By telephone GO TO YG1047
- 8 DON'T KNOW GO TO YG1047
- 7 REFUSED GO TO YG1047

ASK: Respondents who have smoked a [CIGARFILL] in the past 30 days (PAST30DAY\_NL\_[CIGARFILL] = 1) AND indicated that they bought [CIGARFILL] for themselves or that someone else bought [CIGARFILL] for them in the past 30 days (YG1118 = 1 or 2) OR blunt-only cigar smokers (BLUNT\_ONLY\_GRILLO=1 OR BLUNT\_ONLY\_GFC=1) who bought blunts in past 30 days (YG1118=1 or 2).

PROGRAM: If YG1118=1, display "you" and "your [CIGARFILL]s"; If YG1118=2, display "they" and "your [CIGARFILL]s". If YG1118=1 and BLUNT\_ONLY\_GRILLO=1, display "you" and "cigarillos for when you smoke blunts". If YG1118=2 and BLUNT\_ONLY\_GRILLO=1, display "they" and "cigarillos for when you smoke blunts". If YG1118=1 and BLUNT\_ONLY\_GFC=1 display "you" and "filtered cigars for when you smoke blunts". If YG1118=2 and BLUNT\_ONLY\_GFC=1 display "they" and "filtered cigars for when you smoke blunts".

**PATH ID: YG1032**

Do [you/they] usually buy [[CIGARFILL]s | cigarillos for blunts | filtered cigars for blunts]...?

- 1 In your own state
- 2 In another state
- 3 Outside the US
- 8 DON'T KNOW
- 7 REFUSED

ASK: Respondents who have smoked a [CIGARFILL] in the past 30 days (PAST30DAY\_NL\_[CIGARFILL] = 1) AND indicated that the [CIGARFILL]s they bought for themselves or that someone else bought for them were purchased in person (YG1030 = 1) OR blunt-only cigar smokers (BLUNT\_ONLY\_GRILLO=1 OR BLUNT\_ONLY\_GFC=1) who bought blunts in past 30 days (YG1118=1 or 2).

PROGRAM: If YG1118=1, display "you" and [CIGARFILL]s; If YG1118=2, display "they and [CIGARFILL]s". If YG1118=1 AND BLUNT\_ONLY\_GRILLO=1, display "you" and "cigarillos for blunts". If YG1118=2 AND BLUNT\_ONLY\_GRILLO=1, display "they" and "cigarillos for blunts". If YG1118=1 AND BLUNT\_ONLY\_GFC=1 display "you" and "filtered cigars for blunts". If YG1118=2 AND BLUNT\_ONLY\_GFC=1 display "they" and "filtered cigars for blunts".

## Final Youth Baseline Questionnaire - English

**PATH ID: YG1033**

Where do [you/they] buy your [[CIGARFILL]s | cigarillos for blunts | filtered cigars for blunts] most of the time?

- 1 A cigar bar
- 2 A convenience store or gas station
- 3 A supermarket, grocery store, or drug store
- 4 A warehouse club, such as Sam's or Costco
- 5 A smoke shop, tobacco specialty store or tobacco outlet store
- 6 A duty free shop or military commissary
- 7 A bar, pub, restaurant or casino
- 8 A friend or relative [DISPLAY IF YG1118 = 1]
- 9 A swap meet or flea market
- 10 Or from somewhere else SPECIFY: \_\_\_\_\_
- 8 DON'T KNOW
- 7 REFUSED

ASK: Respondents who have smoked a [CIGARFILL] in the past 30 days (PAST30DAY\_NL\_[CIGARFILL] = 1) or blunt-only users (BLUNT\_ONLY\_GRILLO=1 or BLUNT\_ONLY\_GFC=1), AND indicated that the [CIGARFILL]s or blunts they bought for themselves or that someone else bought for them were purchased in person (YG1030 = 1).

PROGRAM: If YG1118=1, display option 8=' A friend or relative,' if YG1118 NE 1, hide option 8.

If YG1118=1, display "you" and [CIGARFILL]s; If YG1118=2, display "they" and [CIGARFILL]s. If YG1118=1 AND BLUNT\_ONLY\_GRILLO=1, display "you" and "cigarillos for blunts". If YG1118=2 AND BLUNT\_ONLY\_GRILLO=1, display "they" and "cigarillos for blunts". If YG1118=1 AND BLUNT\_ONLY\_GFC=1, display "you" and "filtered cigars for blunts". If YG1118=2 AND BLUNT\_ONLY\_GFC=1, display "they" and "filtered cigars for blunts".

If OS field selected and additional OS screen is shown, display question text and add the following text: "Please type your answer using the computer keyboard."

**PATH ID: YG1047**

Do you have a regular brand of [[CIGARFILL]s | cigarillo | filtered cigar] that you usually [smoke | use for blunts]?

- 1 Yes
- 2 No
- 8 DON'T KNOW
- 7 REFUSED

ASK: Respondents who have smoked a [CIGARFILL] in the past 30 days (PAST30DAY\_NL\_[CIGARFILL] = 1) OR blunt-only cigar smoker (BLUNT\_ONLY\_GRILLO=1 OR BLUNT\_ONLY\_GFC=1)

PROGRAM: If BLUNT\_ONLY\_GRILLO=1, display "cigarillo" and "use for blunts". If BLUNT\_ONLY\_GFC=1, display "filtered cigar" and "use for blunts". Else, display [CIGARFILL]s and "smoke".

## Final Youth Baseline Questionnaire - English

**PATH ID: YG1048**

What brand of [[CIGARFILL] I cigarillo for blunts I filtered cigar for blunts] [do I did] you [usually I last] smoke? Please select it from the choices below by touching the screen. If you do not see it below, touch the button marked "NEXT". I If you do not see it below, touch the box marked "Something else". ]

**PROGRAM:**

**[If multiple screens]** Display: If you do not see it below, touch the button marked "NEXT".

**[If single screen OR last screen of multiple screens]** Display: If you do not see it below, touch the box marked "Something else".

[SHOW PICTURES OF THE MAJOR BRANDS ON THE TOUCHSCREEN. WHEN A RESPONDENT SELECTS A BRAND, GO TO YG1070]

|    |                |              |
|----|----------------|--------------|
| 1  | Something else | GO TO YG1049 |
| -8 | DON'T KNOW     | GO TO YG1060 |
| -7 | REFUSED        | GO TO YG1060 |

ASK: Respondents who have smoked a [CIGARFILL] in the past 30 days (PAST30DAY\_NL\_[CIGARFILL] = 1) OR blunt-only cigar smoker (BLUNT\_ONLY\_GRILLO=1 OR BLUNT\_ONLY\_GFC=1).

PROGRAM: If BLUNT\_ONLY\_GRILLO=1, display "cigarillo for blunts". If BLUNT\_ONLY\_GFC=1, display "filtered cigar for blunts". Else, display [CIGARFILL]. If YG1047=1, display "do" and "usually". If YG1047=2, DK or RF, display "did" and "last".

**PATH ID: YG1070**

You selected [BRANDFILL] as your brand. What kind of [BRANDFILL] [do I did] you [usually I last] smoke[as a blunt]? Please select it from the choices below by touching the screen. [ If you do not see it below, touch the button marked "NEXT". I If you do not see it below, touch the box marked "Something else". ]

**PROGRAM:**

**[If multiple screens]** Display: If you do not see it below, touch the button marked "NEXT".

**[If single screen OR last screen of multiple screens]** Display: If you do not see it below, touch the box marked "Something else".

[SHOW PICTURES OR TEXT ON THE TOUCHSCREEN OF THE MAJOR PRODUCTS ASSOCIATED WITH BRAND SELECTED IN YG1048]

|    |                |              |
|----|----------------|--------------|
| 1  | Something else | GO TO YG1071 |
| -8 | DON'T KNOW     | GO TO YG1060 |
| -7 | REFUSED        | GO TO YG1060 |

ASK: Respondents who have smoked a [CIGARFILL] in the past 30 days (PAST30DAY\_NL\_[CIGARFILL] = 1) OR blunt-only cigar smoker (BLUNT\_ONLY\_GRILLO=1 OR BLUNT\_ONLY\_GFC=1) that selected a brand image in YG1048.

PROGRAM: If YG1047=1, display "do" and "usually". If YG1047=2, DK or RF, display "did" and "last". If BLUNT\_ONLY\_GRILLO=1 OR BLUNT\_ONLY\_GFC=1, display "as a blunt".



## Final Youth Baseline Questionnaire - English

**PATH ID: YG1049**

You said that your brand was not pictured. What is it?

- |    |            |              |
|----|------------|--------------|
| 1  | _____      | GO TO YG1060 |
| -8 | DON'T KNOW | GO TO YG1060 |
| -7 | REFUSED    | GO TO YG1060 |

ASK: Respondents who have smoked a [CIGARFILL] in the past 30 days (PAST30DAY\_NL\_[CIGARFILL] = 1) OR blunt-only cigar smokers (AND BLUNT\_ONLY\_GRILLO=1 OR BLUNT\_ONLY\_GFC=1) that did not select an image for their brand (YG1048=1).

**PATH ID: YG1071**

You said that the type of [BRANDFILL]s that you smoke[ as blunts] was not pictured. What type is it?

- |    |            |  |
|----|------------|--|
| 1  | _____      |  |
| -8 | DON'T KNOW |  |
| -7 | REFUSED    |  |

ASK: Respondents who have smoked a [CIGARFILL] in the past 30 days (PAST30DAY\_NL\_[CIGARFILL] = 1) OR blunt-only cigar smoker (BLUNT\_ONLY\_GRILLO=1 OR BLUNT\_ONLY\_GFC=1) who did not select the type of product they use (YG1070="Something else") but who DID select a brand (YG1048<>1, -8, -7). Do not ask of respondents who wrote a brand into YG1049.

PROGRAM: If BLUNT\_ONLY\_GRILLO=1 OR BLUNT\_ONLY\_GFC=1, display "as blunts". Else, no display.

GO TO: If blunt-only smoker of both cigarillos and filtered cigars (BLUNT\_ONLY\_GRILLO=1 AND BLUNT\_ONLY\_GFC=1), repeat blunt questions starting with transition text in Box YG3 for filtered cigar blunt smokers. If blunt-only smoker of just one cigar type (BLUNT\_ONLY\_GRILLO=1 OR BLUNT\_ONLY\_GFC=1), go to YG1124.

Box YG6

Display question YG1060, YG1061, YG1085, YG1062, YG1063, YG1064, YG1066, YG1068, YG1069, YG1072 on one screen. Show the intro/transition text from YG1060 first, then show each item with a Y/N response. As each item is answered, show the next one.

PROGRAM: Randomize order of YG1060 through YG1072.

**PATH ID: YG1060**

The next questions are about the reasons people smoke [CIGARFILL]s. Please select which reasons apply to you.

I smoke [CIGARFILL]s because...

They are affordable.

- |    |            |
|----|------------|
| 1  | Yes        |
| 2  | No         |
| -8 | DON'T KNOW |
| -7 | REFUSED    |

ASK: Respondents who have smoked a [CIGARFILL] in the past 30 days (PAST30DAY\_[CIGARFILL] = 1).

## Final Youth Baseline Questionnaire - English

**PATH ID: YG1061**

People in the media or other public figures smoke [CIGARFILL]s.

- 1 Yes
- 2 No
- 8 DON'T KNOW
- 7 REFUSED

ASK: Respondents who have smoked a [CIGARFILL] in the past 30 days (PAST30DAY\_[CIGARFILL] = 1).

**PATH ID: YG1085**

I can smoke [CIGARFILL]s at times when or in places where smoking cigarettes isn't allowed.

- 1 Yes
- 2 No
- 8 DON'T KNOW
- 7 REFUSED

ASK: Respondents who have smoked a [CIGARFILL] in the past 30 days (PAST30DAY\_[CIGARFILL] = 1).

**PATH ID: YG1062**

They might be less harmful than cigarettes.

- 1 Yes
- 2 No
- 8 DON'T KNOW
- 7 REFUSED

ASK: Respondents who have smoked a [CIGARFILL] in the past 30 days (PAST30DAY\_[CIGARFILL] = 1).

**PATH ID: YG1063**

[CIGARFILL]s come in flavors I like.

- 1 Yes
- 2 No
- 8 DON'T KNOW
- 7 REFUSED

ASK: Respondents who have smoked a [CIGARFILL] in the past 30 days (PAST30DAY\_[CIGARFILL] = 1).

## Final Youth Baseline Questionnaire - English

**PATH ID: YG1064**

Smoking [CIGARFILL]s helps people to quit smoking cigarettes.

- 1 Yes
- 2 No
- 8 DON'T KNOW
- 7 REFUSED

ASK: Respondents who have smoked a [CIGARFILL] in the past 30 days (PAST30DAY\_[CIGARFILL] = 1).

**PATH ID: YG1066**

Smoking a [CIGARFILL] feels like smoking a regular cigarette.

- 1 Yes
- 2 No
- 8 DON'T KNOW
- 7 REFUSED

ASK: Respondents who have smoked a [CIGARFILL] in the past 30 days (PAST30DAY\_[CIGARFILL] = 1).

**PATH ID: YG1068**

People who are important to me smoke [CIGARFILL]s.

- 1 Yes
- 2 No
- 8 DON'T KNOW
- 7 REFUSED

ASK: Respondents who have smoked a [CIGARFILL] in the past 30 days (PAST30DAY\_[CIGARFILL] = 1).

**PATH ID: YG1069**

I like socializing while smoking a [CIGARFILL].

- 1 Yes
- 2 No
- 8 DON'T KNOW
- 7 REFUSED

ASK: Respondents who have smoked a [CIGARFILL] in the past 30 days (PAST30DAY\_[CIGARFILL] = 1).

## Final Youth Baseline Questionnaire - English

**PATH ID: YG1072**

The advertising for [CIGARFILL]s appeals to me.

- 1 Yes
- 2 No
- 8 DON'T KNOW
- 7 REFUSED

ASK: Respondents who have smoked a [CIGARFILL] in the past 30 days (PAST30DAY\_[CIGARFILL] = 1).

**PATH ID: YG1124**

[The next questions ask about regular cigars that are filled with **tobacco**. Please do not think about “blunts”, cigars filled with marijuana, when answering these questions.]

How likely is someone to become addicted to [[CIGARFILL]s I traditional cigars, cigarillos or filtered cigars]?

- 1 Very unlikely
- 2 Somewhat unlikely
- 3 Neither likely nor unlikely
- 4 Somewhat likely
- 5 Very likely
- 8 DON'T KNOW
- 7 REFUSED

ASK: Respondents who have seen or heard of [CIGARFILL]s (YG9101 = 1)

PROGRAM: If R has never smoked a cigar (YG1002=2, -8 or -7), or did not specify type of cigar they have smoked [(YG1002=1 AND YG9104 not in (1,2))] OR [[YG9104(1) <> 1 AND YG9104(2) = 1 AND YG9009 <> 1, 2, or 3] OR [YG9104(1&2) <>1 and YG9105=1 and YG9107 <> 1]], or are blunt only smokers (BLUNT\_ONLY\_GRILLO=1 OR BLUNT\_ONLY\_GFC=1 OR BLUNT\_ONLY\_UNKNOWN), display “traditional cigars, cigarillos or filtered cigars”; else use [CIGARFILL]s display as previously specified.

If blunt only smoker (BLUNT\_ONLY\_GRILLO=1 OR BLUNT\_ONLY\_GFC=1 OR BLUNT\_ONLY\_UNKNOWN=1 OR [[YG9104(1) <> 1 AND YG9104(2) = 1 AND YG9009 <> 1, 2, or 3] OR [YG9104(1&2) <>1 and YG9105=1 and YG9107 <> 1]], display transition text above question text: “The next questions ask about regular cigars that are filled with **tobacco**. Please do not include blunts when answering these questions.” DO NOT display this text for any other user besides the blunt-only groups.

## Final Youth Baseline Questionnaire - English

**PATH ID: YG1099**

Is smoking [[CIGARFILL]s I traditional cigars, cigarillos or filtered cigars,] less harmful, about the same, or more harmful than smoking cigarettes?

- 1 Less harmful
- 2 About the same
- 3 More harmful
- 8 DON'T KNOW
- 7 REFUSED

ASK: Respondents who have seen or heard of [CIGARFILL]s (YG9101 = 1)

PROGRAM: If R has never smoked a cigar (YG1002=2, -8 or -7) or did not specify type of cigar they have smoked [(YG1002=1 AND YG9104 not in (1,2))] OR [[YG9104(1) <> 1 AND YG9104(2) = 1 AND YG9009 <> 1, 2, or 3] OR [YG9104(1&2) <>1 and YG9105=1 and YG9107 <> 1]], or are blunt only smokers (BLUNT\_ONLY\_GRILLO=1 OR BLUNT\_ONLY\_GFC=1 OR BLUNT\_ONLY\_UNKNOWN=1 OR [[YG9104(1) <> 1 AND YG9104(2) = 1 AND YG9009 <> 1, 2, or 3] OR [YG9104(1&2) <>1 and YG9105=1 and YG9107 <> 1]]), display "traditional cigars, cigarillos or filtered cigars"; else use [CIGARFILL]s display as previously specified.

**PATH ID: YG1125**

How much do you think people harm themselves when they smoke [[CIGARFILL]s I traditional cigars, cigarillos or filtered cigars]?

- 1 No harm
- 2 Little harm
- 3 Some harm
- 4 A lot of harm
- 8 DON'T KNOW
- 7 REFUSED

ASK: Respondents who have seen or heard of [CIGARFILL]s (YG9101 = 1)

PROGRAM: If R has never smoked a cigar (YG1002=2, -8 or -7) or did not specify type of cigar they have smoked [(YG1002=1 AND YG9104 not in (1,2))] OR [[YG9104(1) <> 1 AND YG9104(2) = 1 AND YG9009 <> 1, 2, or 3] OR [YG9104(1&2) <>1 and YG9105=1 and YG9107 <> 1]], or are blunt only smokers (BLUNT\_ONLY\_GRILLO=1 OR BLUNT\_ONLY\_GFC=1 OR BLUNT\_ONLY\_UNKNOWN=1 OR [[YG9104(1) <> 1 AND YG9104(2) = 1 AND YG9009 <> 1, 2, or 3] OR [YG9104(1&2) <>1 and YG9105=1 and YG9107 <> 1]]), display "traditional cigars, cigarillos or filtered cigars"; else use [CIGARFILL]s display as previously specified.

## Final Youth Baseline Questionnaire - English

**PATH ID: YG1146**

Some [[CIGARFILL]s I traditional cigars, cigarillos or filtered cigars] come in flavors like menthol, mint, clove, spice, candy, fruit, chocolate, alcohol (such as wine or cognac), or other sweets.

Are flavored [[CIGARFILL]s I traditional cigars, cigarillos or filtered cigars,] easier to smoke, about the same, or harder to smoke than unflavored [[CIGARFILL]s I traditional cigars, cigarillos or filtered cigars]?

- 1 Easier to smoke
- 2 About the same
- 3 Harder to smoke
- 8 DON'T KNOW
- 7 REFUSED

ASK: Respondents who have seen or heard of [CIGARFILL]s (YG9101 = 1)

PROGRAM: If R has never smoked a cigar (YG1002=2, -8 or -7) or did not specify type of cigar they have smoked [(YG1002=1 AND YG9104 not in (1,2))] OR [[YG9104(1) <> 1 AND YG9104(2) = 1 AND YG9009 <> 1, 2, or 3] OR [YG9104(1&2) <>1 and YG9105=1 and YG9107 <> 1]], or are blunt only smokers (BLUNT\_ONLY\_GRILLO=1 OR BLUNT\_ONLY\_GFC=1 OR BLUNT\_ONLY\_UNKNOWN=1 OR [[YG9104(1) <> 1 AND YG9104(2) = 1 AND YG9009 <> 1, 2, or 3] OR [YG9104(1&2) <>1 and YG9105=1 and YG9107 <> 1])), display "traditional cigars, cigarillos or filtered cigars"; else use [CIGARFILL]s display as previously specified.

## Final Youth Baseline Questionnaire - English

### PIPE TOBACCO SECTION

#### BOX YP1

The next set of questions are about smoking tobacco in a **pipe**.

Pipes come in many shapes and sizes. They all have a bowl that holds the tobacco and a stem. Pipe tobacco is often sold loose in packages or tins. In the following section, we are only asking about smoking pipes filled with tobacco. The picture below shows a typical pipe and some pipe tobacco.

[SHOW IMAGES OF PIPES AND PIPE TOBACCO – BOTH LOOSE AND IN TINS]

#### PATH ID: YP1001

Have you ever seen or heard of a pipe before this study?

- |    |            |                 |
|----|------------|-----------------|
| 1  | Yes        |                 |
| 2  | No         | GO TO YHINTRO_1 |
| -8 | DON'T KNOW | GO TO YHINTRO_1 |
| -7 | REFUSED    | GO TO YHINTRO_1 |

ASK: All respondents.

DISPLAY GENERIC IMAGE OF PIPE AND PIPE TOBACCO

#### PATH ID: YP1002

Have you ever smoked a pipe filled with tobacco, even one or two puffs?

- |    |            |              |
|----|------------|--------------|
| 1  | Yes        | GO TO YP1005 |
| 2  | No         |              |
| -8 | DON'T KNOW |              |
| -7 | REFUSED    |              |

ASK: Respondents who have seen or heard of pipe tobacco (YP1001 = 1).

DISPLAY GENERIC IMAGE OF PIPE AND PIPE TOBACCO

#### PATH ID: YP1103

Have you ever been curious about smoking a pipe filled with tobacco?

- |    |                    |
|----|--------------------|
| 1  | Very curious       |
| 2  | Somewhat curious   |
| 3  | A little curious   |
| 4  | Not at all curious |
| -8 | DON'T KNOW         |
| -7 | REFUSED            |

ASK: Respondents that have seen or heard of pipe tobacco but have not smoked it (YP1001 = 1 AND YP1002 = 2, -8 or -7).

## Final Youth Baseline Questionnaire - English

**PATH ID: YP1104**

Do you think you will try smoking a pipe filled with tobacco soon?

- 1 Definitely yes
- 2 Probably yes
- 3 Probably not
- 4 Definitely not
- 8 DON'T KNOW
- 7 REFUSED

ASK: Respondents that have seen or heard of pipe tobacco but have not smoked it (YP1001 = 1 AND YP1002 = 2, -8 or -7).

**PATH ID: YP1105**

If one of your best friends were to offer you a pipe filled with tobacco, would you smoke it?

- 1 Definitely yes
- 2 Probably yes
- 3 Probably not
- 4 Definitely not
- 8 DON'T KNOW
- 7 REFUSED

ASK: Respondents that have seen or heard of pipe tobacco but have not smoked it (YP1001 = 1 AND YP1002 = 2, -8 or -7).

GO TO: If respondent has never smoked a pipe (YP1002 = 2, -8 or -7), GO TO YP1124.

Else GO TO YP1005

**PATH ID: YP1005**

How many bowls filled with pipe tobacco have you smoked in your entire life?

- 1 1 or more puffs but never a whole one
- 2 1
- 3 2 to 10
- 4 11 to 20
- 5 21 to 50
- 6 51 to 99
- 7 100 or more
- 8 DON'T KNOW
- 7 REFUSED

ASK: Respondents who have smoked a pipe (YP1002 = 1).





## Final Youth Baseline Questionnaire - English

PROGRAM:

CREATE VARIABLES:

### **PAST30DAY\_PIPE (Past 30 Day Users)**

PAST30DAY\_PIPE = 1 Yes, if respondent has smoked a pipe within the past 30 days (YP1112=1 or 2 or 3).

Else PAST30DAY\_PIPE = 2 No.

### **PAST30DAY\_VL\_PIPE (Past 30 Day Very Light Users)**

PAST30DAY\_VL\_PIPE = 1 Yes, if respondent has smoked less than 10 bowls of pipe tobacco in lifetime (YP1005=1 or 2 or 3) AND last smoked a pipe in the past 30 days (YP1112=1 or 2 or 3).

Else PAST30DAY\_VL\_PIPE = 2 No.

### **PAST30DAY\_NL\_PIPE (Past 30 Day Not Light Users)**

PAST30DAY\_NL\_PIPE = 1 Yes, if respondent has smoked more than 10 bowls of pipe tobacco in lifetime (YP1005 > 3) AND last smoked a pipe within the past 30 days (YP1112=1 or 2 or 3).

Else PAST30DAY\_NL\_PIPE = 2 No.

**PATH ID: YP1022**

In the past 30 days, on how many days did you smoke a pipe?

1 | \_ | \_ | \_ |

-8 DON'T KNOW

-7 REFUSED

ASK: Respondents who have smoked a pipe in the past 30 days (PAST30DAY\_PIPE = 1)

PROGRAM: Range check: 1-30 days

**PATH ID: YP1023**

In the past 30 days, on the days you smoked a pipe, how many bowls filled with tobacco did you smoke per day?

1 Less than 1 bowl per day

2 1 bowl per day

3 2 to 5 bowls per day

4 6 to 10 bowls per day

5 11 to 20 bowls per day

6 More than 20 bowls per day

-8 DON'T KNOW

-7 REFUSED

ASK: Respondents who have smoked a pipe in the past 30 days (PAST30DAY\_PIPE = 1).

## Final Youth Baseline Questionnaire - English

**PATH ID: YP1130**

In the past 30 days, was any of the pipe tobacco you smoked flavored to taste like menthol, mint, clove, spice, candy, fruit, chocolate, alcohol (such as wine or cognac), or other sweets?

- 1 Yes
- 2 No
- 8 DON'T KNOW
- 7 REFUSED

ASK: Respondents who have smoked a pipe in the past 30 days (PAST30DAY\_PIPE = 1).

**PATH ID: YP1123**

In the past 30 days, did anyone refuse to sell you pipe tobacco because of your age?

- 1 Yes
- 2 No
- 3 I did not try to buy pipe tobacco in the past 30 days
- 8 DON'T KNOW
- 7 REFUSED

ASK: Respondents who have smoked a pipe in the past 30 days (PAST30DAY\_PIPE = 1).

**PATH ID: YP1118**

In the past 30 days, how did you usually get your own pipe tobacco?

- 1 I bought it myself
- 2 I gave someone else money to buy it for me GO TO YP1030
- 3 I asked someone to give me some GO TO YP1047
- 4 Someone offered it to me GO TO YP1047
- 5 I bought it from another person GO TO YP1047
- 6 I took it from a store or another person GO TO YP1047
- 7 I got it some other way GO TO YP1047  
SPECIFY \_\_\_\_\_
- 8 DON'T KNOW GO TO YP1047
- 7 REFUSED GO TO YP1047

ASK: Respondents who have smoked a pipe in the past 30 days (PAST30DAY\_PIPE = 1).

PROGRAM: If OS field selected and additional OS screen is shown, display question text and add the following text: "Please type your answer using the computer keyboard."

GO TO: If PAST30DAY\_VL\_PIPE=1, go to Box YP2

Else go to YP1097.

## Final Youth Baseline Questionnaire - English

**PATH ID: YP1097**

In the past 30 days, did you use a coupon when buying pipe tobacco?

- |    |            |              |
|----|------------|--------------|
| 1  | Yes        |              |
| 2  | No         | GO TO YP1030 |
| -8 | DON'T KNOW | GO TO YP1030 |
| -7 | REFUSED    | GO TO YP1030 |

ASK: Respondents who have smoked a pipe in the past 30 days (PAST30DAY\_NL\_PIPE = 1) that tried to buy pipe tobacco in the past 30 days (YP1123 NE 3) AND bought pipe tobacco themselves in the past 30 days (YP1118=1)

**PATH ID: YP1098**

How many times in the past 30 days have you used a coupon to buy pipe tobacco?

- |    |            |  |
|----|------------|--|
| 1  | I__I__I    |  |
| -8 | DON'T KNOW |  |
| -7 | REFUSED    |  |

ASK: Respondents who have smoked a pipe in the past 30 days (PAST30DAY\_NL\_PIPE = 1) AND who used a coupon in the past 30 days (YP1097 = 1)

**PATH ID: YP1030**

How do [you/they] usually buy your pipe tobacco? Is it...

- |    |                   |              |
|----|-------------------|--------------|
| 1  | In person         |              |
| 2  | From the internet | GO TO YP1047 |
| 3  | By telephone      | GO TO YP1047 |
| -8 | DON'T KNOW        | GO TO YP1047 |
| -7 | REFUSED           | GO TO YP1047 |

ASK: Respondents who have smoked a pipe in the past 30 days (PAST30DAY\_NL\_PIPE = 1) AND indicated that they bought pipe tobacco for themselves or that someone else bought pipe tobacco for them in the past 30 days (YP1118 = 1 or 2).

PROGRAM: If YP1118=1, display "you"; If YP1118=2, display "they".

**PATH ID: YP1032**

Do [you/they] usually buy pipe tobacco...

- |    |                   |  |
|----|-------------------|--|
| 1  | In your own state |  |
| 2  | In another state  |  |
| 3  | Outside the US    |  |
| -8 | DON'T KNOW        |  |
| -7 | REFUSED           |  |

ASK: Respondents who have smoked a pipe in the past 30 days (PAST30DAY\_NL\_PIPE = 1) AND indicated that the pipe tobacco that they bought for themselves or that someone else bought for them was purchases in person (YP1030 = 1).

PROGRAM: If YP1118=1, display "you"; If YP1118=2, display "they"

## Final Youth Baseline Questionnaire - English

**PATH ID: YP1033**

Where do [you/they] buy your pipe tobacco most of the time?

- 1 A convenience store or gas station
- 2 A supermarket, grocery store, or drug store
- 3 A warehouse club, such as Sam's or Costco
- 4 A smoke shop, tobacco specialty store or tobacco outlet store
- 5 A duty free shop or military commissary
- 6 A bar, pub, restaurant or casino
- 7 A friend or relative [DISPLAY IF YP1118 = 1]
- 8 A swap meet or flea market
- 9 Or from somewhere else SPECIFY: \_\_\_\_\_
- 8 DON'T KNOW
- 7 REFUSED

ASK: Respondents who have smoked a pipe in the past 30 days (PAST30DAY\_NL\_PIPE = 1) AND indicated that the pipe tobacco that they bought for themselves or that someone else bought for them was purchased in person (YP1030 = 1).

PROGRAM: If YP1118=1, display "you"; If YP1118=2, display "they"

If YP1118=1, display option 7=' A friend or relative,' if YP1118 NE 1, hide option 7.

If OS field selected and additional OS screen is shown, display question text and add the following text: "Please type your answer using the computer keyboard."

**PATH ID: YP1047**

Do you have a regular brand of pipe tobacco that you usually smoke?

- 1 Yes
- 2 No
- 8 DON'T KNOW
- 7 REFUSED

ASK: Respondents who have smoked a pipe in the past 30 days (PAST30DAY\_NL\_PIPE = 1).

## Final Youth Baseline Questionnaire - English

**PATH ID: YP1048**

What brand of pipe tobacco [do I did] you [usually I last] smoke? Please select it from the choices below by touching the screen. [ If you do not see it below, touch the button marked "NEXT". I If you do not see it below, touch the box marked "Something else". ]

**PROGRAM:**

**[If multiple screens]** Display: If you do not see it below, touch the button marked "NEXT".

**[If single screen OR last screen of multiple screens]** Display: If you do not see it below, touch the box marked "Something else".

[SHOW PICTURES OF THE MAJOR BRANDS ON THE TOUCHSCREEN. WHEN A RESPONDENT SELECTS A BRAND, GO TO YP1070]

- |    |                |              |
|----|----------------|--------------|
| 1  | Something else | GO TO YP1049 |
| -8 | DON'T KNOW     | GO TO YP1060 |
| -7 | REFUSED        | GO TO YP1060 |

ASK: Respondents who have smoked a pipe in the past 30 days (PAST30DAY\_NL\_PIPE = 1).

PROGRAM: If YP1047=1, display "do" and "usually". If YP1047=2, DK or RF, display "did" and "last"

**PATH ID: YP1070**

You selected [BRANDFILL] as your brand. What kind of [BRANDFILL] [do I did] you [usually I last] smoke? Please select it from the choices below by touching the screen. [ If you do not see it below, touch the button marked "NEXT". I If you do not see it below, touch the box marked "Something else". ]

**PROGRAM:**

**[If multiple screens]** Display: If you do not see it below, touch the button marked "NEXT".

**[If single screen OR last screen of multiple screens]** Display: If you do not see it below, touch the box marked "Something else".

[SHOW PICTURES OR TEXT ON THE TOUCHSCREEN OF THE MAJOR PRODUCTS ASSOCIATED WITH BRAND SELECTED IN YP1048]

- |    |                |              |
|----|----------------|--------------|
| 1  | Something else | GO TO YP1071 |
| -8 | DON'T KNOW     | GO TO YP1060 |
| -7 | REFUSED        | GO TO YP1060 |

ASK: Respondents who have smoked a pipe in the past 30 days (PAST30DAY\_NL\_PIPE = 1) and selected a brand image in YP1048.

PROGRAM: If YP1047=1, display "do" and "usually". If YP1047=2, DK or RF, display "did" and "last"

**PATH ID: YP1049**

You said that your brand was not pictured. What is it?

- |    |            |              |
|----|------------|--------------|
| 1  | _____      | GO TO YP1060 |
| -8 | DON'T KNOW | GO TO YP1060 |
| -7 | REFUSED    | GO TO YP1060 |

ASK: Respondents who have smoked a pipe in the past 30 days (PAST30DAY\_NL\_PIPE = 1) that did not select an image for their brand (YP1048 = 1).

## Final Youth Baseline Questionnaire - English

**PATH ID: YP1071**

You said that the type of [BRANDFILL]s that you smoke was not pictured. What type is it?

- 1 \_\_\_\_\_
- 8 DON'T KNOW
- 7 REFUSED

ASK: Respondents who have smoked a pipe in the past 30 days (PAST30DAY\_NL\_PIPE = 1) who did not select the type of product they use (YP1070="Something else") but who DID select a brand (YP1048<>1, -8, -7). Do not ask of respondents who wrote a brand into YP1049.

Box YP2

Display question YP1060, YP1061, YP1085, YP1062, YP1063, YP1064, YP1068, YP1069, YP1072 on one screen. Show the intro/transition text from YP1060 first, then show each item with a Y/N response. As each item is answered, show the next one.

PROGRAM: Randomize order of YP1060 through YP1072.

**PATH ID: YP1060**

The next questions are about the reasons people smoke a pipe. Please select which reasons apply to you.

I smoke a pipe filled with tobacco because...

It is affordable.

- 1 Yes
- 2 No
- 8 DON'T KNOW
- 7 REFUSED

ASK: Respondents who have smoked a pipe in the past 30 days (PAST30DAY\_PIPE = 1).

**PATH ID: YP1061**

People in the media or other public figures smoke pipes.

- 1 Yes
- 2 No
- 8 DON'T KNOW
- 7 REFUSED

ASK: Respondents who have smoked a pipe in the past 30 days (PAST30DAY\_PIPE = 1).

**PATH ID: YP1085**

I can smoke a pipe at times when or in places where smoking cigarettes isn't allowed.

- 1 Yes
- 2 No
- 8 DON'T KNOW
- 7 REFUSED

ASK: Respondents who have smoked a pipe in the past 30 days (PAST30DAY\_PIPE = 1).

## Final Youth Baseline Questionnaire - English

**PATH ID: YP1062**

It might be less harmful than smoking cigarettes.

- 1 Yes
- 2 No
- 8 DON'T KNOW
- 7 REFUSED

ASK: Respondents who have smoked a pipe in the past 30 days (PAST30DAY\_PIPE = 1).

**PATH ID: YP1063**

Pipe tobacco comes in flavors I like.

- 1 Yes
- 2 No
- 8 DON'T KNOW
- 7 REFUSED

ASK: Respondents who have smoked a pipe in the past 30 days (PAST30DAY\_PIPE = 1).

**PATH ID: YP1064**

Smoking a pipe helps people to quit smoking cigarettes.

- 1 Yes
- 2 No
- 8 DON'T KNOW
- 7 REFUSED

ASK: Respondents who have smoked a pipe in the past 30 days (PAST30DAY\_PIPE = 1).

**PATH ID: YP1068**

People who are important to me smoke pipes.

- 1 Yes
- 2 No
- 8 DON'T KNOW
- 7 REFUSED

ASK: Respondents who have smoked a pipe in the past 30 days (PAST30DAY\_PIPE = 1).

**PATH ID: YP1069**

I like socializing while smoking a pipe.

- 1 Yes
- 2 No
- 8 DON'T KNOW
- 7 REFUSED

ASK: Respondents who have smoked a pipe in the past 30 days (PAST30DAY\_PIPE = 1).



## Final Youth Baseline Questionnaire - English

**PATH ID: YP1072**

The advertising for pipes appeal to me.

- 1 Yes
- 2 No
- 8 DON'T KNOW
- 7 REFUSED

ASK: Respondents who have smoked a pipe in the past 30 days (PAST30DAY\_PIPE = 1).

**PATH ID: YP1124**

How likely is someone to become addicted to pipe tobacco?

- 1 Very unlikely
- 2 Somewhat unlikely
- 3 Neither likely or unlikely
- 4 Somewhat likely
- 5 Very likely
- 8 DON'T KNOW
- 7 REFUSED

ASK: Respondents who have seen or heard of pipe tobacco (YP1001 = 1).

**PATH ID: YP1099**

Is smoking pipe tobacco less harmful, about the same, or more harmful than smoking cigarettes?

- 1 Less harmful
- 2 About the same
- 3 More harmful
- 8 DON'T KNOW
- 7 REFUSED

ASK: Respondents who have seen or heard of pipe tobacco (YP1001 = 1).

**PATH ID: YP1125**

How much do you think people harm themselves when they smoke a pipe?

- 1 No harm
- 2 Little harm
- 3 Some harm
- 4 A lot of harm
- 8 DON'T KNOW
- 7 REFUSED

ASK: Respondents who have seen or heard of pipe tobacco (YP1001 = 1).

## Final Youth Baseline Questionnaire - English

**PATH ID: YP1146**

Some pipe tobacco comes in flavors like menthol, mint, clove, spice, candy, fruit, chocolate, alcohol (such as wine or cognac), or other sweets.

Is flavored pipe tobacco easier to smoke, about the same, or harder to smoke than unflavored pipe tobacco?

- 1 Easier to smoke
- 2 About the same
- 3 Harder to smoke
- 8 DON'T KNOW
- 7 REFUSED

ASK: Respondents who have seen or heard of pipe tobacco (YP1001 = 1).

## Final Youth Baseline Questionnaire - English

### HOOKAH SECTION

[YHINTRO\_1]

The next few questions are about smoking tobacco in a **hookah**. A hookah pipe is a type of water pipe that is sometimes also called a narghile pipe. From now on, we will use hookah to refer to a water pipe or narghile pipe that is often used to smoke tobacco.

There are many types of hookahs. People often smoke tobacco in hookahs in groups at cafes or in hookah bars.

SHOW GENERIC IMAGES OF HOOKAH

[YHINTRO\_2]

People smoke shisha or hookah tobacco in a hookah. Some shisha contains tobacco and some does not. Shisha comes in many flavors.

SHOW GENERIC IMAGES OF SHISHA

**PATH ID: YH1001**

Have you ever seen or heard of a hookah before this study?

- |    |            |              |
|----|------------|--------------|
| 1  | Yes        |              |
| 2  | No         | GO TO SMLTOB |
| -8 | DON'T KNOW | GO TO SMLTOB |
| -7 | REFUSED    | GO TO SMLTOB |

ASK: All respondents.

SHOW GENERIC IMAGES OF HOOKAH

**PATH ID: YH1002**

Have you ever smoked tobacco in a hookah, even one or two puffs?

- |    |            |              |
|----|------------|--------------|
| 1  | Yes        | GO TO YH1005 |
| 2  | No         |              |
| -8 | DON'T KNOW |              |
| -7 | REFUSED    |              |

ASK: Respondents who have seen or heard of a hookah (YH1001 = 1).

SHOW GENERIC IMAGES OF HOOKAH

## Final Youth Baseline Questionnaire - English

**PATH ID: YH1103**

Have you ever been curious about smoking tobacco in a hookah?

- 1 Very curious
- 2 Somewhat curious
- 3 A little curious
- 4 Not at all curious
- 8 DON'T KNOW
- 7 REFUSED

ASK: Respondents who have seen or heard of a hookah but not smoked a hookah (YH1001 = 1 AND YH1002 = 2, -8 or -7).

**PATH ID: YH1104**

Do you think you will try smoking tobacco in a hookah soon?

- 1 Definitely yes
- 2 Probably yes
- 3 Probably not
- 4 Definitely not
- 8 DON'T KNOW
- 7 REFUSED

ASK: Respondents who have seen or heard of a hookah but not smoked a hookah (YH1001 = 1 AND YH1002 = 2, -8 or -7).

**PATH ID: YH1105**

If one of your best friends were to offer you a hookah, would you smoke it?

- 1 Definitely yes
- 2 Probably yes
- 3 Probably not
- 4 Definitely not
- 8 DON'T KNOW
- 7 REFUSED

ASK: Respondents who have seen or heard of a hookah but not smoked hookah (YH1001 = 1 AND YH1002 = 2, -8 or -7).

GO TO: If respondent has never smoked hookah (YH1002 = 2, -8 or -7), GO TO YH1124.

## Final Youth Baseline Questionnaire - English

**PATH ID: YH1005**

How many times have you smoked tobacco in a hookah in your entire life? Count each sitting or session where you smoked tobacco in a hookah, whether alone or with others.

- 1 1
- 2 2 to 10
- 3 11 to 20
- 4 21 to 50
- 5 51 to 99
- 6 100 or more
- 8 DON'T KNOW
- 7 REFUSED

ASK: Respondents who have smoked hookah (YH1002 = 1).

**PATH ID: YH1112**

When was the last time you smoked tobacco in a hookah, even one or two puffs?

- 1 Earlier today
- 2 Not today but sometime in the past 7 days
- 3 Not in the past 7 days but sometime in the past 30 days
- 4 Not in the past 30 days but sometime in the past 6 months
- 5 Not in the past 6 months but sometime in the past year
- 6 1 to 4 years ago GO TO YH1090
- 7 5 or more years ago GO TO YH1090
- 8 DON'T KNOW
- 7 REFUSED

ASK: Respondents who have smoked hookah (YH1002 = 1).

**PATH ID: YH9003**

Which of the following choices best describes your hookah smoking? Usually I smoke hookah...

- 1 Everyday GO TO YH9006
- 2 Weekly GO TO YH9005
- 3 Monthly GO TO YH9004
- 4 Every couple of months GO TO YH1090
- 5 About once a year GO TO YH1090
- 8 DON'T KNOW
- 7 REFUSED

ASK: Respondents who have smoked hookah at least once in the past 12 months (YH1112 = 1, 2, 3, 4, 5, DK, or RF).

## Final Youth Baseline Questionnaire - English

**PATH ID: YH9004**

On average, about how many times do you smoke tobacco in a hookah in a month? Count each sitting or session where you smoked tobacco in a hookah, whether alone or with others.

- 1 |\_\_|\_\_|
- 8 DON'T KNOW
- 7 REFUSED

ASK: Respondents who smoke hookah monthly (YH9003 = 3).

**PATH ID: YH9005**

On average, about how many times do you smoke tobacco in a hookah in a week? Count each sitting or session where you smoked tobacco in a hookah, whether alone or with others.

- 1 |\_\_|\_\_|
- 8 DON'T KNOW
- 7 REFUSED

ASK: Respondents who smoke hookah weekly (YH9003 = 2).

**PATH ID: YH9006**

On average, about how many times do you smoke tobacco in a hookah each day? Count each sitting or session where you smoked tobacco in a hookah, whether alone or with others.

- 1 |\_\_|\_\_|
- 8 DON'T KNOW
- 7 REFUSED

ASK: Respondents who smoke hookah daily (YH9003 = 1).

**PATH ID: YH1090**

Do you own a hookah?

- 1 Yes
- 2 No
- 8 DON'T KNOW
- 7 REFUSED

ASK: Respondents who have smoked hookah (YH1002 = 1).

**PATH ID: YH1191**

Do any of your parents or guardians own a hookah?

- 1 Yes
- 2 No
- 8 DON'T KNOW
- 7 REFUSED

ASK: Respondents who have seen or heard of a hookah (YH1001 = 1).

## Final Youth Baseline Questionnaire - English

**PATH ID: YH1006**

How old were you when you first tried smoking hookah, even one or two puffs?

- 1 |\_\_|\_\_| GO TO YH1108
- 8 DON'T KNOW
- 7 REFUSED

ASK: Respondents who have smoked hookah (YH1002 = 1).

DISPLAY: Display "Years old" as a title.

**PATH ID: YH1120**

When you first tried smoking hookah, even one or two puffs, were you...

- 1 Less than 12 years old,
- 2 12 to 14 years old, or
- 3 15 to 17 years old?
- 8 DON'T KNOW
- 7 REFUSED

ASK: All respondents who refused to give or did not know age (YH1006=-8 OR -7)

**PATH ID: YH1108**

Was the first shisha or hookah tobacco you smoked flavored to taste like menthol, mint, clove, spice, candy, fruit, chocolate, alcohol (such as wine or cognac), or other sweets?

- 1 Yes
- 2 No
- 8 DON'T KNOW
- 7 REFUSED

ASK: Respondents who have smoked hookah (YH1002 = 1).

**PATH ID: YH9012**

Do you usually share the same hookah with others when you smoke?

- 1 Yes
- 2 No GO TO YH9014
- 8 DON'T KNOW GO TO YH9011
- 7 REFUSED GO TO YH9011

ASK: Respondents who have smoked hookah in the past 30 days (YH1112=1, 2 or 3).

## Final Youth Baseline Questionnaire - English

**PATH ID: YH9013**

How many people do you usually share hookah with?

- 1 1 other person
- 2 2 other people
- 3 3 other people
- 4 4 or more other people
- 8 DON'T KNOW
- 7 REFUSED

ASK: Respondents who have smoked hookah in the past 30 days (YH1112=1, 2 or 3) that report sharing with others (YH9012=1).

**PATH ID: YH9014**

On average, how long is one hookah session for you [and the people you share it with]? A session is one sitting in which you smoke hookah, whether alone or with others.

- 1 Less than 30 minutes
- 2 30-60 minutes
- 3 1-2 hours
- 4 More than 2 hours
- 8 DON'T KNOW
- 7 REFUSED

ASK: Respondents who have smoked hookah in the past 30 days ((YH1112=1, 2 or 3) and (YH9012=1 or 2)).

PROGRAM: If respondent reports sharing with others (YH9012=1), display "and the people you share it with". Else, do not display bracketed text.

**PATH ID: YH9015**

On average, when you [smoke I share] hookah, how many times do you refill it with tobacco?

- 1 0 times
- 2 1 time
- 3 2 to 3 times
- 4 4 or more times
- 8 DON'T KNOW
- 7 REFUSED

ASK: Respondents who have smoked hookah in the past 30 days ((YH1112=1, 2 or 3) and (YH9012=1 or 2)).

PROGRAM: If respondent reports not sharing with others (YH9012=2), display 'smoke'; if respondent reports sharing with others (YH9012=1), display "share".



## Final Youth Baseline Questionnaire - English

**PATH ID: YH9011**

Where do you usually smoke hookah? Choose all that apply.

- 1 At home
- 2 In a hookah bar or café
- 3 At a friend's house
- 4 Somewhere else (SPECIFY \_\_\_\_\_)
- 8 DON'T KNOW
- 7 REFUSED

ASK: Respondents who have smoked hookah in the past 30 days (YH1112=1, 2 or 3).

PROGRAM: If OS field selected and additional OS screen is shown, display question text and add the following text: "Please type your answer using the computer keyboard."

**PATH ID: YH1130**

In the past 30 days, was any of the shisha or hookah tobacco you smoked flavored to taste like menthol, mint, clove, spice, candy, fruit, chocolate, alcohol (such as wine or cognac), or other sweets?

- 1 Yes
- 2 No
- 8 DON'T KNOW
- 7 REFUSED

ASK: Respondents who have smoked hookah in the past 30 days (YH1112=1, 2 or 3).

**PATH ID: YH1123**

In the past 30 days, did anyone refuse to sell you shisha or hookah tobacco because of your age?

- 1 Yes
- 2 No
- 3 I did not try to buy shisha tobacco in the past 30 days
- 8 DON'T KNOW
- 7 REFUSED

ASK: Respondents who have smoked hookah in the past 30 days (YH1112=1, 2 or 3).

## Final Youth Baseline Questionnaire - English

**PATH ID: YH1118**

In the past 30 days, how did you usually get your own shisha or hookah tobacco?

- |    |                                            |              |
|----|--------------------------------------------|--------------|
| 1  | I bought it myself                         |              |
| 2  | I gave someone else money to buy it for me | GO TO YH1030 |
| 3  | I asked someone to give me some            | GO TO YH1047 |
| 4  | Someone offered it to me                   | GO TO YH1047 |
| 5  | I bought it from another person            | GO TO YH1047 |
| 6  | I took it from a store or another person   | GO TO YH1047 |
| 7  | I got it some other way SPECIFY _____      | GO TO YH1047 |
| -8 | DON'T KNOW                                 | GO TO YH1047 |
| -7 | REFUSED                                    | GO TO YH1047 |

ASK: Respondents who have smoked hookah in the past 30 days (YH1112=1, 2 or 3).

PROGRAM: If OS field selected and additional OS screen is shown, display question text and add the following text: "Please type your answer using the computer keyboard."

**PATH ID: YH1097**

In the past 30 days, did you use a coupon when buying shisha or hookah tobacco?

- |    |            |              |
|----|------------|--------------|
| 1  | Yes        |              |
| 2  | No         | GO TO YH1030 |
| -8 | DON'T KNOW | GO TO YH1030 |
| -7 | REFUSED    | GO TO YH1030 |

ASK: Respondents who tried to buy shisha tobacco in the past 30 days (YH1123 NE 3) AND bought shisha tobacco themselves in the past 30 days (YH1118=1)

**PATH ID: YH1098**

How many times in the past 30 days have you used a coupon to buy shisha or hookah tobacco?

- |    |            |  |
|----|------------|--|
| 1  | _ _        |  |
| -8 | DON'T KNOW |  |
| -7 | REFUSED    |  |

ASK: Respondents who used a coupon in the past 30 days (YH1097 = 1)

**PATH ID: YH1030**

How do [you/they] usually buy your shisha or hookah tobacco? Is it...

- |    |                                              |              |
|----|----------------------------------------------|--------------|
| 1  | In person (such as at a store or hookah bar) |              |
| 2  | From the internet                            | GO TO YH1047 |
| 3  | By telephone                                 | GO TO YH1047 |
| -8 | DON'T KNOW                                   | GO TO YH1047 |
| -7 | REFUSED                                      | GO TO YH1047 |

ASK: Respondents who indicated that they bought shisha tobacco for themselves or that someone else bought shisha tobacco for them in the past 30 days (YH1118 = 1 or 2).

PROGRAM: If YH1118=1, display "you"; If YH1118=2, display "they".

## Final Youth Baseline Questionnaire - English

**PATH ID: YH1032**

Do [you/they] usually buy shisha or hookah tobacco...

- 1 In your own state
- 2 In another state
- 3 Outside the US
- 8 DON'T KNOW
- 7 REFUSED

ASK: Respondents who indicated that the shisha tobacco they bought for themselves or that someone else bought for them was purchased in-person (YH1030= 1).

PROGRAM: If YH1118=1, display "you"; If YH1118=2, display "they"

**PATH ID: YH1033**

Where do [you/they] buy your shisha or hookah tobacco most of the time?

- 1 A hookah bar or cafe
- 2 A convenience store or gas station
- 3 A supermarket, grocery store, or drug store
- 4 A warehouse club, such as Sam's or Costco
- 5 A smoke shop, tobacco specialty store or tobacco outlet store
- 6 A duty free shop or military commissary
- 7 A bar, pub, restaurant or casino
- 8 A friend or relative [DISPLAY IF YH1118 = 1]
- 9 A swap meet or flea market
- 10 Or from somewhere else SPECIFY: \_\_\_\_\_
- 8 DON'T KNOW
- 7 REFUSED

ASK: Respondents who indicated that the shisha tobacco they bought for themselves or that someone else bought for them was purchased in-person (YH1030 = 1).

PROGRAM: If YH1118=1, display "you"; If YH1118=2, display "they"

If YH1118=1, display option 8=' A friend or relative,' if YH118 NE 1, hide option 8.

If OS field selected and additional OS screen is shown, display question text and add the following text: "Please type your answer using the computer keyboard."

**PATH ID: YH1047**

Do you have a regular brand of shisha or hookah tobacco that you usually smoke?

- 1 Yes
- 2 No
- 8 DON'T KNOW
- 7 REFUSED

ASK: Respondents who have smoked hookah in the past 30 days (YH1112=1, 2 or 3).

## Final Youth Baseline Questionnaire - English

**PATH ID: YH1048**

What brand of shisha or hookah tobacco [do I did] you [usually I last] smoke? Please select it from the choices below by touching the screen. [ If you do not see it below, touch the button marked "NEXT". ] If you do not see it below, touch the box marked "Something else". ]

**PROGRAM:**

**[If multiple screens]** Display: If you do not see it below, touch the button marked "NEXT".

**[If single screen OR last screen of multiple screens]** Display: If you do not see it below, touch the box marked "Something else".

[SHOW PICTURES OF THE MAJOR BRANDS ON THE TOUCHSCREEN. WHEN A RESPONDENT SELECTS A BRAND, GO TO YH1070]

- |    |                |              |
|----|----------------|--------------|
| 1  | Something else | GO TO YH1049 |
| -8 | DON'T KNOW     | GO TO YH1060 |
| -7 | REFUSED        | GO TO YH1060 |

ASK: Respondents who have smoked hookah in the past 30 days (YH1112=1, 2 or 3).

PROGRAM: If YH1047=1, display "do" and "usually". If YH1047=2, DK or RF, display "did" and "last"

**PATH ID: YH1070**

You selected [BRANDFILL] as your brand. What kind of [BRANDFILL] [do I did] you [usually I last] smoke? Please select it from the choices below by touching the screen. [ If you do not see it below, touch the button marked "NEXT". ] If you do not see it below, touch the box marked "Something else". ]

**PROGRAM:**

**[If multiple screens]** Display: If you do not see it below, touch the button marked "NEXT".

**[If single screen OR last screen of multiple screens]** Display: If you do not see it below, touch the box marked "Something else".

[SHOW PICTURES OR TEXT ON THE TOUCHSCREEN OF THE MAJOR PRODUCTS ASSOCIATED WITH BRAND SELECTED IN YH1048]

- |    |                |              |
|----|----------------|--------------|
| 1  | Something else | GO TO YH1071 |
| -8 | DON'T KNOW     | GO TO YH1060 |
| -7 | REFUSED        | GO TO YH1060 |

ASK: Respondents who have smoked hookah in the past 30 days (YH1112=1, 2 or 3) and selected a brand image in YH1048.

PROGRAM: If YH1047=1, display "do" and "usually". If YH1047=2, DK or RF, display "did" and "last"

**PATH ID: YH1049**

You said that your brand was not pictured. What is it?

- |    |            |               |
|----|------------|---------------|
| 1  | _____      | GO TO YH9108  |
| -8 | DON'T KNOW | GO TO BOX YH2 |
| -7 | REFUSED    | GO TO BOX YH2 |

ASK: Respondents who did not select an image for their brand (YH1048 = 1)

## Final Youth Baseline Questionnaire - English

**PATH ID: YH1071**

You said that the type of [BRANDFILL]s that you smoke was not pictured. What type is it?

- 1 \_\_\_\_\_
- 8 DON'T KNOW
- 7 REFUSED

ASK: Respondents who have smoked hookah in the past 30 days (YH1112=1, 2 or 3) who did not select the type of product they use (YH1070="Something else") but who DID select a brand (YH1048<>1, -8, -7). Do not ask of respondents who wrote a brand into YH1049.

**PATH ID: YH9108**

Does this brand of shisha contain tobacco?

- 1 Yes
- 2 No
- 8 DON'T KNOW
- 7 REFUSED

ASK: Respondents who have smoked hookah in the past 30 days (YH1112=1, 2 or 3) who selected a brand in YH1048 or entered their brand in YH1049.

Box YH2

Display question YH1060, YH1061, YH1085, YH1062, YH1063, YH1064, YH1066, YH1068, YH1069, YH1072 and YH1073 on one screen. Show the intro/transition text from YH1060 first, then show each item with a Y/N response. As each item is answered, show the next one.

PROGRAM: Randomize order of YH1060 through YH1073.

**PATH ID: YH1060**

The next questions are about the reasons people smoke hookah. Please select which reasons apply to you.

I smoke hookah because...

It is affordable.

- 1 Yes
- 2 No
- 8 DON'T KNOW
- 7 REFUSED

ASK: Respondents who have smoked hookah in the past 30 days (YH1112=1, 2 or 3).

**PATH ID: YH1061**

People in the media or other public figures smoke hookah.

- 1 Yes
- 2 No
- 8 DON'T KNOW
- 7 REFUSED

ASK: Respondents who have smoked hookah in the past 30 days (YH1112=1, 2 or 3).

## Final Youth Baseline Questionnaire - English

**PATH ID: YH1085**

I can smoke hookah at times when or in places where smoking cigarettes isn't allowed.

- 1 Yes
- 2 No
- 8 DON'T KNOW
- 7 REFUSED

ASK: Respondents who have smoked hookah in the past 30 days (YH1112=1, 2 or 3).

**PATH ID: YH1062**

It might be less harmful than smoking cigarettes.

- 1 Yes
- 2 No
- 8 DON'T KNOW
- 7 REFUSED

ASK: Respondents who have smoked hookah in the past 30 days (YH1112=1, 2 or 3).

**PATH ID: YH1063**

Shisha or hookah tobacco comes in flavors I like.

- 1 Yes
- 2 No
- 8 DON'T KNOW
- 7 REFUSED

ASK: Respondents who have smoked hookah in the past 30 days (YH1112=1, 2 or 3).

**PATH ID: YH1064**

Smoking hookah helps people to quit smoking cigarettes.

- 1 Yes
- 2 No
- 8 DON'T KNOW
- 7 REFUSED

ASK: Respondents who have smoked hookah in the past 30 days (YH1112=1, 2 or 3).

**PATH ID: YH1068**

People who are important to me smoke hookah.

- 1 Yes
- 2 No
- 8 DON'T KNOW
- 7 REFUSED

ASK: Respondents who have smoked hookah in the past 30 days (YH1112=1, 2 or 3).

## Final Youth Baseline Questionnaire - English

**PATH ID: YH1069**

I like socializing while smoking hookah.

- 1 Yes
- 2 No
- 8 DON'T KNOW
- 7 REFUSED

ASK: Respondents who have smoked hookah in the past 30 days (YH1112=1, 2 or 3).

**PATH ID: YH1072**

The advertising for hookah appeals to me.

- 1 Yes
- 2 No
- 8 DON'T KNOW
- 7 REFUSED

ASK: Respondents who have smoked hookah in the past 30 days (YH1112=1, 2 or 3).

**PATH ID: YH1073**

Smoking hookah is part of my cultural tradition.

- 1 Yes
- 2 No
- 8 DON'T KNOW
- 7 REFUSED

ASK: Respondents who have smoked hookah in the past 30 days (YH1112=1, 2 or 3).

**PATH ID: YH1124**

How likely is someone to become addicted to shisha or hookah tobacco?

- 1 Very unlikely
- 2 Somewhat unlikely
- 3 Neither likely nor unlikely
- 4 Somewhat likely
- 5 Very likely
- 8 DON'T KNOW
- 7 REFUSED

ASK: Respondents who have seen or heard of a hookah (YH1001 = 1).

## Final Youth Baseline Questionnaire - English

**PATH ID: YH1099**

Is smoking hookah less harmful, about the same, or more harmful than smoking cigarettes?

- 1 Less harmful
- 2 About the same
- 3 More harmful
- 8 DON'T KNOW
- 7 REFUSED

ASK: Respondents who have seen or heard of a hookah (YH1001 = 1).

**PATH ID: YH1125**

How much do you think people harm themselves when they smoke hookah?

- 1 No harm
- 2 A little harm
- 3 Some harm
- 4 A lot of harm
- 8 DON'T KNOW
- 7 REFUSED

ASK: Respondents who have seen or heard of a hookah (YH1001 = 1).

**PATH ID: YH1146**

Some shisha or hookah tobacco comes in flavors like menthol, mint, clove, spice, candy, fruit, chocolate, alcohol (such as wine or cognac), or other sweets.

Is flavored shisha or hookah tobacco easier to smoke, about the same, or harder to smoke than unflavored shisha or hookah tobacco?

- 1 Easier to smoke
- 2 About the same
- 3 Harder to smoke
- 8 DON'T KNOW
- 7 REFUSED

ASK: Respondents who have seen or heard of a hookah (YH1001 = 1).

**PATH ID: YH9110**

Is shisha that does not contain tobacco less harmful, about the same, or more harmful than shisha that does contain tobacco?

- 1 Less harmful
- 2 About the same
- 3 More harmful
- 8 DON'T KNOW
- 7 REFUSED

ASK: Respondents who have seen or heard of a hookah (YH1001 = 1).



## Final Youth Baseline Questionnaire - English

### SMOKELESS TOBACCO SECTION

[SMLTOB]

The next questions ask about **smokeless tobacco** which you put in your mouth. Frequently you chew, suck or spit while using smokeless tobacco, although there is no need to do so for some types. Snus, for instance, is a type of smokeless tobacco that comes in a small pouch that you put inside your lip.

There are many kinds of smokeless tobacco, such as snus pouches, loose snus, moist snuff, dip, spit, and chewing tobacco. Common brands include Redman, Levi Garrett, Beechnut, Skoal, Grizzly, Nordic Ice and Copenhagen.

SHOW GENERIC IMAGE OF SMOKELESS TOBACCO

**PATH ID: YS1001**

Have you ever seen or heard of smokeless tobacco, such as snus pouches, loose snus, moist snuff, dip, spit or chewing tobacco, before this study?

- |    |            |               |
|----|------------|---------------|
| 1  | Yes        |               |
| 2  | No         | GO TO BOX AD1 |
| -8 | DON'T KNOW | GO TO BOX AD1 |
| -7 | REFUSED    | GO TO BOX AD1 |

ASK: All respondents.

SHOW GENERIC IMAGE OF SMOKELESS TOBACCO

**PATH ID: YS1002**

Have you ever used any of the following smokeless tobacco products, even one or two times? Choose all that apply.

- |    |                                                        |               |
|----|--------------------------------------------------------|---------------|
| 1  | Snus pouches                                           | GO TO BOX YS4 |
| 2  | Loose snus, moist snuff, dip, spit, or chewing tobacco | GO TO BOX YS5 |
| 3  | I have never used a smokeless tobacco product          | GO TO YS1103  |
| -8 | DON'T KNOW                                             | GO TO YS1103  |
| -7 | REFUSED                                                | GO TO YS1103  |

ASK: Respondents who have seen or heard of smokeless tobacco (YS1001 = 1).

PROGRAM: Option 3 cannot be selected with options 1 or 2.

SHOW GENERIC IMAGE OF SMOKELESS TOBACCO

## Final Youth Baseline Questionnaire - English

**PATH ID: YS1103**

Have you ever been curious about using smokeless tobacco?

- 1 Very curious
- 2 Somewhat curious
- 3 A little curious
- 4 Not at all curious
- 8 DON'T KNOW
- 7 REFUSED

ASK: Respondents who have seen or heard of smokeless tobacco but have not ever used it ((YS1001 = 1 AND YS1002 = 3, -8 or -7)).

**PATH ID: YS1104**

Do you think you will try smokeless tobacco soon?

- 1 Definitely yes
- 2 Probably yes
- 3 Probably not
- 4 Definitely not
- 8 DON'T KNOW
- 7 REFUSED

ASK: Respondents who have seen or heard of smokeless tobacco but have not ever used it ((YS1001 = 1 AND YS1002 = 3, -8 or -7)).

**PATH ID: YS1105**

If one of your best friends were to offer you smokeless tobacco, would you use it?

- 1 Definitely yes
- 2 Probably yes
- 3 Probably not
- 4 Definitely not
- 8 DON'T KNOW
- 7 REFUSED

ASK: Respondents who have seen or heard of smokeless tobacco but have not ever used it ((YS1001 = 1 AND YS1002 = 3, -8 or -7)).

GO TO: If respondent has never used smokeless tobacco (YS1002 = 3, -8 or -7), GO TO YS1124.

Else GO TO BOX YS4

BOX YS4

DEFINE VARIABLE [OTHPOUCH] to capture names of types of smokeless tobacco pouches other than snus pouches.

OTHPOUCH="Skoal Bandits"

## Final Youth Baseline Questionnaire - English

**PATH ID: YU1003**

You mentioned that you have used snus pouches. There are many brands of snus pouches. Did you use the brand called "[OTHPOUCH]"?

- 1 Yes, I used only [OTHPOUCH]
- 2 Yes, I used both [OTHPOUCH] and other brands of snus pouches
- 3 No, I did not use [OTHPOUCH]
- 8 DON'T KNOW
- 7 REFUSED

ASK: Respondents that have ever used snus pouches ((YS1002(1)=1 IN SNUS POUCHES))

### **BOX YS5**

DEFINE: CREATE AN ARRAY SMKLSSTYPE WITH 2 ELEMENTS – ONE FOR EACH SMOKELESS TOBACCO TYPE (SMOKELESS TOBACCO; SNUS)

#### **SMKLSSTYPE[1]=1 'smokeless tobacco'**

Respondent uses smokeless tobacco, but not snus pouches:

If respondent has ever used smokeless tobacco (YS1002[2]=1) and has not used snus (YS1002[1]=2), then SMKLSSTYPE[1]=1 ; {uses smokeless tobacco only}.

If respondent has ever used smokeless tobacco (YS1002[2]=1) and has used snus (YS1002[1]=1), and used only (OTHPOUCH) (YU1003=1), then SMKLSSTYPE[1]=1 ; {uses snus - Skoal Bandits > same as smokeless user}

If respondent has never used smokeless tobacco (YS1002[2]=2) and has used snus (YS1002[1]=1), and used only (OTHPOUCH) (YU1003=1), then SMKLSSTYPE[1]=1 ; {uses snus - Skoal Bandits > same as smokeless user}

#### **SMKLSSTYPE[2]=2 'snus pouches'**

Respondent uses snus pouches but not other forms of smokeless:

If respondent has never used smokeless tobacco (YS1002[2]=2) and has used snus (YS1002[1]=1), and used both (OTHPOUCH) and other brands (YU1003=2), then SMKLSSTYPE[2]=2 ; {uses snus pouches}

If respondent has never used smokeless tobacco (YS1002[2]=2) and has used snus (YS1002[1]=1), and did not use (OTHPOUCH) (YU1003=3), then SMKLSSTYPE[2]=2 ; {uses snus pouches}

#### **SMKLSSTYPE[1]=1 AND SMKLSSTYPE[2]=2 'smokeless tobacco' and 'snus pouches'**

Respondent uses snus pouches AND other forms of smokeless:

If respondent has ever used smokeless tobacco (YS1002[2]=1) and has used snus (YS1002[1]=1), and used both (OTHPOUCH) and other brands (YU1003=2), then SMKLSSTYPE[1] =1 AND SMKLSSTYPE[2]=2. If respondent has ever used smokeless tobacco (YS1002[2]=1) and has used snus (YS1002[1]=1), and did not use (OTHPOUCH) (YU1003=3), then SMKLSSTYPE[1] =1 AND SMKLSSTYPE[2]=2.

Then do the following:

{FILL-1} If SMKLSSTYPE[1] = 1 and SMLSTYPE[2] = NULL, complete the rest of this section one time, filling [SMKLSSFILL] with "smokeless tobacco"

{FILL-2} If SMKLSSTYPE[1] = NULL and SMKLSSTYPE[2] = 2, complete the rest of this section one time, filling [SMKLSSFILL] with "snus pouches"

## Final Youth Baseline Questionnaire - English

{FILL-3} If SMKLSSTYPE[1] = 1 and SMKLSSTYPE[2] = 2, complete the rest of this section TWICE. The first time, fill [SMKLSSFILL] with “snus pouches”. The second time, fill [SMKLSSFILL] with “smokeless tobacco.”

### BOX YS6

{FILL-1}

If SMKLSSTYPE[1] = 1 and SMKLSSTYPE[2] = NULL (respondent uses smokeless tobacco, but not snus pouches), no transition text shown. GO DIRECTLY TO YS1005.

{FILL-2}

If SMKLSSTYPE[1] = NULL and SMKLSSTYPE[2] = 2 (respondent uses snus pouches but not other forms of smokeless), display the following text:

The next questions ask about snus pouches. Common brands of snus pouches include Camel snus, General snus, Marlboro snus, and Nordic Ice, but there are many others.

Please think about your use of snus pouches as you answer these questions.

[SHOW GENERIC IMAGE OF SNUS TIN AND POUCHES]

{FILL-3}

If SMKLSSTYPE[1]=1 and SMKLSSTYPE[2]=2, (respondent uses snus pouches AND other forms of smokeless) FIRST TIME THROUGH, display the following text:

The next questions ask about snus pouches, a type of smokeless tobacco that comes in a small pouch that you put under your lip.

Common brands of snus pouches include Camel snus, General snus, Marlboro snus, and Nordic Ice, but there are many others.

Please think about your use of snus pouches as you answer these questions. There will be a separate section later about other kinds of smokeless tobacco.

[SHOW GENERIC IMAGE OF SNUS TIN AND POUCHES]

If SMKLSSTYPE[1]=1 and SMKLSSTYPE[2]=2, SECOND TIME THROUGH, display the following text:

You just answered questions about snus pouches. The next questions are about your use of other kinds of smokeless tobacco, such as loose snus, moist snuff, dip, spit, and chewing tobacco.

Common brands include Redman, Levi Garrett, Beechnut, Skoal, Grizzly and Copenhagen, but there are many others.

The questions will use the phrase “smokeless tobacco” to refer to these products. Please think about your use of smokeless tobacco products, not including snus pouches, as you answer these questions.

[SHOW GENERIC IMAGE OF SMOKELESS PRODUCTS, EXCLUDING SNUS TIN AND POUCHES]

## Final Youth Baseline Questionnaire - English

**PATH ID: YS1005**

How many [times I snus pouches] have you used [smokeless tobacco] in your entire life?

- 1 1
- 2 2 to 10
- 3 11 to 20
- 4 21 to 50
- 5 51 to 99
- 6 100 or more
- 8 DON'T KNOW
- 7 REFUSED

ASK: Respondents who have used [SMKLSSFILL] (YS1002 = 1).

PROGRAM: If SMKLSSTYPE[1]=1, display "times" and "smokeless tobacco"; if SMKLSSTYPE[2]=2, display "snus pouches".

**PATH ID: YS1006**

How old were you when you first tried [SMKLSSFILL], even one or two times?

- 1 |\_\_| GO TO YS1108
- 8 DON'T KNOW
- 7 REFUSED

ASK: Respondents who have used [SMKLSSFILL] (YS1002 = 1).

DISPLAY: Display "Years old" as a title.

**PATH ID: YS1120**

When you first tried [SMKLSSFILL], even one or two times, were you...

- 1 Less than 12 years old,
- 2 12 to 14 years old, or
- 3 15 to 17 years old?
- 8 DON'T KNOW
- 7 REFUSED

ASK: All respondents who refused to give or did not know age (YS1006=-8 OR -7)

**PATH ID: YS1108**

Was the first [smokeless tobacco product I snus pouch] you used flavored to taste like menthol, mint, clove, spice, candy, fruit, chocolate, alcohol (such as wine or cognac), or other sweets?

- 1 Yes
- 2 No
- 8 DON'T KNOW
- 7 REFUSED

ASK: Respondents who have used [SMKLSSFILL] (YS1002 = 1).

PROGRAM: If SMKLSSFILL[1]=1, display 'smokeless tobacco product'; if SMKLSSFILL[2]=2 display 'snus pouch'

## Final Youth Baseline Questionnaire - English

**PATH ID: YS1112**

When did you last use [SMKLSSFILL], even one or two times?

- |    |                                                           |              |
|----|-----------------------------------------------------------|--------------|
| 1  | Earlier today                                             |              |
| 2  | Not today but sometime in the past 7 days                 |              |
| 3  | Not in the past 7 days but sometime in the past 30 days   |              |
| 4  | Not in the past 30 days but sometime in the past 6 months | GO TO YS1124 |
| 5  | Not in the past 6 months but sometime in the past year    | GO TO YS1124 |
| 6  | 1 to 4 years ago                                          | GO TO YS1124 |
| 7  | 5 or more years ago                                       | GO TO YS1124 |
| -8 | DON'T KNOW                                                | GO TO YS1124 |
| -7 | REFUSED                                                   | GO TO YS1124 |

ASK: Respondents who have used [SMKLSSFILL] (YS1002 = 1).

PROGRAM:

CREATE VARIABLES FOR SMOKELESS AND SNUS:

**PAST30DAY\_[SMKLSSFILL] (Past 30 Day Users)**

PAST30DAY\_[SMKLSSFILL] = 1 Yes, if respondent has used smokeless tobacco within the past 30 days (YS1112=1 or 2 or 3).

Else PAST30DAY\_[SMKLSSFILL] = 2 No.

**PAST30DAY\_VL\_[SMKLSSFILL] (Past 30 Day Very Light Users)**

PAST30DAY\_VL\_[SMKLSSFILL] = 1 Yes, if respondent has used less than 10 times/pouches in lifetime (YS1005=1 or 2) AND last used smokeless tobacco in the past 30 days (YS1112=1 or 2 or 3).

Else PAST30DAY\_VL\_[SMKLSSFILL] = 2 No.

**PAST30DAY\_NL\_[SMKLSSFILL] (Past 30 Day Not Light Users)**

PAST30DAY\_NL\_[SMKLSSFILL] = 1 Yes, if respondent has used more than 10 times/pouches in lifetime (YS1005 > 2) AND last used smokeless tobacco within the past 30 days (YS1112=1 or 2 or 3).

Else PAST30DAY\_NL\_[SMKLSSFILL] = 2 No.

**PATH ID: YS1022**

In the past 30 days, on how many days did you use [SMKLSSFILL]?

- |    |            |
|----|------------|
| 1  | _ _        |
| -8 | DON'T KNOW |
| -7 | REFUSED    |

ASK: Respondents who have used [SMKLSSFILL] in the past 30 days (PAST30DAY\_[SMKLSSFILL] = 1)

PROGRAM: Range check: 1-30 days

## Final Youth Baseline Questionnaire - English

**PATH ID: YS1023**

In the past 30 days, on the days you used [SMKLSSFILL], [how many times did you use smokeless tobacco per day | how many snus pouches did you use per day]?

- 1 Less than 1 per day
- 2 1 per day
- 3 2 to 5 per day
- 4 6 to 10 per day
- 5 11 to 20 per day
- 6 More than 20 per day
- 8 DON'T KNOW
- 7 REFUSED

ASK: Respondents who have used [SMKLSSFILL] in the past 30 days (PAST30DAY\_[SMKLSSFILL] = 1).

PROGRAM: If display SMKLSSTYPE[1]=1, "how many times did you usually use smokeless tobacco each day; if SMKLSSTYPE[2]=2, display "how many snus pouches did you usually use each day"

**PATH ID: YS1130**

In the past 30 days, [was | were] any of the [smokeless tobacco | snus pouches] you used flavored to taste like menthol, mint, clove, spice, candy, fruit, chocolate, alcohol (such as wine or cognac), or other sweets?

- 1 Yes
- 2 No
- 8 DON'T KNOW
- 7 REFUSED

ASK: Respondents who have used [SMKLSSFILL] in the past 30 days (PAST30DAY\_[SMKLSSFILL] = 1).

PROGRAM: If SMKLSSTYPE[1]=1, display "was" and "smokeless tobacco"; if SMKLSSTYPE[2]=2, display "were" and "snus pouches".

**PATH ID: YS1123**

In the past 30 days, did anyone refuse to sell you [SMKLSSFILL] because of your age?

- 1 Yes
- 2 No
- 3 I did not try to buy [SMKLSSFILL] in the past 30 days
- 8 DON'T KNOW
- 7 REFUSED

ASK: Respondents who have used [SMKLSSFILL] in the past 30 days (PAST30DAY\_[SMKLSSFILL] = 1).

## Final Youth Baseline Questionnaire - English

**PATH ID: YS1118**

In the past 30 days, how did you usually get your own [SMKLSSFILL]?

- |    |                                            |              |
|----|--------------------------------------------|--------------|
| 1  | I bought it myself                         |              |
| 2  | I gave someone else money to buy it for me | GO TO YS1030 |
| 3  | I asked someone to give me some            | GO TO YS1047 |
| 4  | Someone offered it to me                   | GO TO YS1047 |
| 5  | I bought it from another person            | GO TO YS1047 |
| 6  | I took it from a store or another person   | GO TO YS1047 |
| 7  | I got it some other way                    | GO TO YS1047 |
|    | SPECIFY _____                              |              |
| -8 | DON'T KNOW                                 | GO TO YS1047 |
| -7 | REFUSED                                    | GO TO YS1047 |

ASK: Respondents who have used [SMKLSSFILL] in the past 30 days (PAST30DAY\_[SMKLSSFILL] = 1).

PROGRAM: If OS field selected and additional OS screen is shown, display question text and add the following text: "Please type your answer using the computer keyboard."

GO TO: If PAST30DAY\_VL\_[SMKLSSFILL]=1, go toBox YS2

Else go to YS1097.

**PATH ID: YS1097**

In the past 30 days, did you use a coupon when buying [SMKLSSFILL]?

- |    |            |              |
|----|------------|--------------|
| 1  | Yes        |              |
| 2  | No         | GO TO YS1030 |
| -8 | DON'T KNOW | GO TO YS1030 |
| -7 | REFUSED    | GO TO YS1030 |

ASK: Respondents who have used [SMKLSSFILL] in the past 30 days (PAST30DAY\_NL\_[SMKLSSFILL] = 1) AND tried to buy [SMKLSSFILL] in the past 30 days (YS1123 NE 3) AND bought [SMKLSSFILL] themselves in the past 30 days (YS1118=1)

**PATH ID: YS1098**

How many times in the past 30 days have you used a coupon to buy [SMKLSSFILL]?

- |    |            |  |
|----|------------|--|
| 1  | _ _        |  |
| -8 | DON'T KNOW |  |
| -7 | REFUSED    |  |

ASK: Respondents who have used [SMKLSSFILL] in the past 30 days (PAST30DAY\_NL\_[SMKLSSFILL] = 1) AND used a coupon in the past 30 days (YS1097 = 1)



## Final Youth Baseline Questionnaire - English

**PATH ID: YS1030**

How do [you/they] usually buy your [SMKLSSFILL]? Is it...

- |    |                   |              |
|----|-------------------|--------------|
| 1  | In person         |              |
| 2  | From the internet | GO TO YS1047 |
| 3  | By telephone      | GO TO YS1047 |
| -8 | DON'T KNOW        | GO TO YS1047 |
| -7 | REFUSED           | GO TO YS1047 |

ASK: Respondents who have used [SMKLSSFILL] in the past 30 days (PAST30DAY\_NL\_[SMKLSSFILL] = 1) AND indicated that they bought [SMKLSSFILL] for themselves or that someone else bought [SMKLSSFILL] for them in the past 30 days (YS1118 = 1 or 2).

PROGRAM: If YS1118=1, display "you"; If YS1118=2, display "they".

**PATH ID: YS1032**

Do [you/they] usually buy it..

- |    |                   |
|----|-------------------|
| 1  | In your own state |
| 2  | In another state  |
| 3  | Outside the US    |
| -8 | DON'T KNOW        |
| -7 | REFUSED           |

ASK: Respondents who have used [SMKLSSFILL] in the past 30 days (PAST30DAY\_NL\_[SMKLSSFILL] = 1) AND indicated that the [SMKLSSFILL] they bought for themselves or that someone else bought for them was purchased in person (YS1030 = 1).

PROGRAM: If YS1118=1, display "you"; If YS1118=2, display "they"

**PATH ID: YS1033**

Where do [you/they] buy your [SMKLSSFILL] most of the time?

- |    |                                                               |                         |
|----|---------------------------------------------------------------|-------------------------|
| 1  | A convenience store or gas station                            |                         |
| 2  | A supermarket, grocery store, or drug store                   |                         |
| 3  | A warehouse club, such as Sam's or Costco                     |                         |
| 4  | A smoke shop, tobacco specialty store or tobacco outlet store |                         |
| 5  | A duty free shop or military commissary                       |                         |
| 6  | A bar, pub, restaurant or casino                              |                         |
| 7  | A friend or relative                                          | [DISPLAY IF YS1118 = 1] |
| 8  | A swap meet or flea market                                    |                         |
| 9  | Or from somewhere else                                        | SPECIFY: _____          |
| -8 | DON'T KNOW                                                    |                         |
| -7 | REFUSED                                                       |                         |

ASK: Respondents who have used [SMKLSSFILL] in the past 30 days (PAST30DAY\_NL\_[SMKLSSFILL] = 1) AND indicated that the [SMKLSSFILL] they bought for themselves or that someone else bought for them was purchased in person (YS1030 = 1).

PROGRAM: If YS1118=1, display "you"; If YS1118=2, display "they"

If YS1118=1, display option 7=' A friend or relative,' if YS1118 NE 1, hide option 7.

If OS field selected and additional OS screen is shown, display question text and add the following text: "Please type your answer using the computer keyboard."

## Final Youth Baseline Questionnaire - English

**PATH ID: YS1047**

Do you have a regular brand of [SMKLSSFILL] that you usually use?

- 1 Yes
- 2 No
- 8 DON'T KNOW
- 7 REFUSED

ASK: Respondents who have used [SMKLSSFILL] in the past 30 days (PAST30DAY\_NL\_[SMKLSSFILL] = 1).

**PATH ID: YS1048**

What brand of [SMKLSSFILL] [do I did] you [usually I last] use? Please select it from the choices below by touching the screen. [ If you do not see it below, touch the button marked "NEXT". I If you do not see it below, touch the box marked "Something else".

**PROGRAM:**

**[If multiple screens]** Display: If you do not see it below, touch the button marked "NEXT".

**[If single screen OR last screen of multiple screens]** Display: If you do not see it below, touch the box marked "Something else".

[SHOW PICTURES OF THE MAJOR BRANDS ON THE TOUCHSCREEN. WHEN A RESPONDENT SELECTS A BRAND, GO TO YS1070]

- |    |                |              |
|----|----------------|--------------|
| 1  | Something else | GO TO YS1049 |
| -8 | DON'T KNOW     | GO TO YS1060 |
| -7 | REFUSED        | GO TO YS1060 |

ASK: Respondents who have used [SMKLSSFILL] in the past 30 days (PAST30DAY\_NL\_[SMKLSSFILL] = 1).

PROGRAM: If 1047=1, display "do" and "usually". If 1047=2, DK or RF, display "did" and "last"

## Final Youth Baseline Questionnaire - English

### PATH ID: YS1070

You selected [BRANDFILL] as your brand. What kind of [BRANDFILL] [do I did] you [usually I last] use? Please select it from the choices below by touching the screen. [ If you do not see it below, touch the button marked "NEXT". I If you do not see it below, touch the box marked "Something else".

#### PROGRAM:

[If multiple screens] Display: If you do not see it below, touch the button marked "NEXT".

[If single screen OR last screen of multiple screens] Display: If you do not see it below, touch the box marked "Something else".

[SHOW PICTURES OR TEXT ON THE TOUCHSCREEN OF THE MAJOR PRODUCTS ASSOCIATED WITH BRAND SELECTED IN YS1048]

- |    |                |              |
|----|----------------|--------------|
| 1  | Something else | GO TO YS1071 |
| -8 | DON'T KNOW     | GO TO YS1060 |
| -7 | REFUSED        | GO TO YS1060 |

ASK: Respondents who have used [SMKLSSFILL] in the past 30 days (PAST30DAY\_NL\_[SMKLSSFILL] = 1) and selected a brand image in YS1048.

PROGRAM: If 1047=1, display "do" and "usually". If 1047=2, DK or RF, display "did" and "last"

### PATH ID: YS1049

You said that your brand was not pictured. What is it?

- |    |            |              |
|----|------------|--------------|
| 1  | _____      | GO TO YS1060 |
| -8 | DON'T KNOW | GO TO YS1060 |
| -7 | REFUSED    | GO TO YS1060 |

ASK: Respondents who have used [SMKLSSFILL] in the past 30 days (PAST30DAY\_NL\_[SMKLSSFILL] = 1) AND did not select an image for their brand (YS1048= 1).

### PATH ID: YS1071

You said that the type of [BRANDFILL]s that you use was not pictured. What type is it?

- |    |            |  |
|----|------------|--|
| 1  | _____      |  |
| -8 | DON'T KNOW |  |
| -7 | REFUSED    |  |

ASK: Respondents who have used [SMKLSSFILL] in the past 30 days (PAST30DAY\_NL\_[SMKLSSFILL] = 1) who did not select the type of product they use (YS1070="Something else") but who DID select a brand (YS1048<>1, -8, -7). Do not ask of respondents who wrote a brand into YS1049.

#### Box YS2

Display question YS1060, YS1061, YS1085, YS1062, YS1075, YS1063, YS1064, YS1065, YS1067, YS1068, YU1076, YU1070, YS1072 on one screen. Show the intro/transition text from YS1060 first, then show each item with a Y/N response. As each item is answered, show the next one.

PROGRAM NOTE: Items YU1076 and YU1070 are only shown for snus users; they are not shown for smokeless tobacco users.

PROGRAM: Randomize order of YS1060 through YS1072.

## Final Youth Baseline Questionnaire - English

**PATH ID: YS1060**

The next questions are about the reasons people [SMKLSSFILL]. Please select which reasons apply to you.

I use [SMKLSSFILL] because...

It is affordable.

- 1 Yes
- 2 No
- 8 DON'T KNOW
- 7 REFUSED

ASK: Respondents who have used [SMKLSSFILL] in the past 30 days (PAST30DAY\_[SMKLSSFILL] = 1).

**PATH ID: YS1061**

People in the media or other public figures use [SMKLSSFILL].

- 1 Yes
- 2 No
- 8 DON'T KNOW
- 7 REFUSED

ASK: Respondents who have used [SMKLSSFILL] in the past 30 days (PAST30DAY\_[SMKLSSFILL] = 1).

**PATH ID: YS1085**

I can use [SMKLSSFILL] at times when or in places where smoking cigarettes isn't allowed.

- 1 Yes
- 2 No
- 8 DON'T KNOW
- 7 REFUSED

ASK: Respondents who have used [SMKLSSFILL] in the past 30 days (PAST30DAY\_[SMKLSSFILL] = 1).

**PATH ID: YS1062**

[It | They] might be less harmful to me than cigarettes.

- 1 Yes
- 2 No
- 8 DON'T KNOW
- 7 REFUSED

ASK: Respondents who have used [SMKLSSFILL] in the past 30 days (PAST30DAY\_[SMKLSSFILL] = 1).

PROGRAM: IF SMKLSSFILL[1]=1, display "It"; If SMKLSSFILL[2]=2, display "They"

## Final Youth Baseline Questionnaire - English

**PATH ID: YS1075**

[It | They] might be less harmful to people around me than cigarettes.

- 1 Yes
- 2 No
- 8 DON'T KNOW
- 7 REFUSED

ASK: Respondents who have used [SMKLSSFILL] in the past 30 days (PAST30DAY\_[SMKLSSFILL] = 1).

PROGRAM: IF SMKLSSFILL[1]=1, display "It"; If SMKLSSFILL[2]=2, display "They"

**PATH ID: YS1063**

[Smokeless tobacco comes | Snus pouches come] in flavors I like.

- 1 Yes
- 2 No
- 8 DON'T KNOW
- 7 REFUSED

ASK: Respondents who have used [SMKLSSFILL] in the past 30 days (PAST30DAY\_[SMKLSSFILL] = 1).

PROGRAM: If SMKLSSFILL[1]=1, display "Smokeless tobacco comes"; if SMKLSSFILL[2]=2, display "Snus pouches come".

**PATH ID: YS1064**

Using [SMKLSSFILL] helps people to quit smoking cigarettes.

- 1 Yes
- 2 No
- 8 DON'T KNOW
- 7 REFUSED

ASK: Respondents who have used [SMKLSSFILL] in the past 30 days (PAST30DAY\_[SMKLSSFILL] = 1).

**PATH ID: YS1065**

[Smokeless tobacco doesn't | Snus pouches don't] smell.

- 1 Yes
- 2 No
- 8 DON'T KNOW
- 7 REFUSED

ASK: Respondents who have used [SMKLSSFILL] in the past 30 days (PAST30DAY\_[SMKLSSFILL] = 1).

PROGRAM: If SMKLSSFILL[1]=1, display "Smokeless tobacco doesn't"; If SMKLSSFILL[2]=2, display "Snus pouches don't"

## Final Youth Baseline Questionnaire - English

**PATH ID: YS1067**

[Smokeless tobacco doesn't | Snus pouches don't] bother non-tobacco users.

- 1 Yes
- 2 No
- 8 DON'T KNOW
- 7 REFUSED

ASK: Respondents who have used [SMKLSSFILL] in the past 30 days (PAST30DAY\_[SMKLSSFILL] = 1).

PROGRAM: If SMKLSSFILL[1]=1, display "Smokeless tobacco doesn't"; If SMKLSSFILL[2]=2, display "Snus pouches don't"

**PATH ID: YS1068**

People who are important to me use [SMKLSSFILL].

- 1 Yes
- 2 No
- 8 DON'T KNOW
- 7 REFUSED

ASK: Respondents who have used [SMKLSSFILL] in the past 30 days (PAST30DAY\_[SMKLSSFILL] = 1).

GO TO: If SMKLSSFILL[2]=2, GO TO YU1076.

Else GO TO YS1072.

**PATH ID: YU1076**

No one can tell when I am using a snus pouch.

- 1 Yes
- 2 No
- 8 DON'T KNOW
- 7 REFUSED

ASK: Respondents who have used snus in the past 30 days (PAST30DAY\_[SMKLSSFILL] = 1).

PROGRAM: This is only asked of snus users where SMKLSSFILL[2]=2; This is not asked of smokeless tobacco users where SMKLSSFILL[1]=1.

**PATH ID: YU1070**

The sensations are stronger or more pleasurable than cigarettes.

- 1 Yes
- 2 No
- 8 DON'T KNOW
- 7 REFUSED

ASK: Respondents who have used snus (SMKLSSFILL[2]=2 in the past 30 days (PAST30DAY\_[SMKLSSFILL] = 1) AND who have also smoked cigarettes in the past 30 days (PAST30DAY\_CIGS = 1).

PROGRAM: This is only asked of snus users where SMKLSSFILL[2]=2; This is not asked of smokeless tobacco users where SMKLSSFILL[1]=1.

## Final Youth Baseline Questionnaire - English

**PATH ID: YS1072**

The advertising for [SMKLSSFILL] appeals to me.

- 1 Yes
- 2 No
- 8 DON'T KNOW
- 7 REFUSED

ASK: Respondents who have used [SMKLSSFILL] in the past 30 days (PAST30DAY\_[SMKLSSFILL] = 1).

PROGRAM: This is asked of both types of smokeless tobacco users.

**PATH ID: YS1086**

In the past 30 days, have you used [SMKLSSFILL] at times when or in places where you could not smoke cigarettes?

- 1 Yes
- 2 No
- 8 DON'T KNOW
- 7 REFUSED

ASK: Respondents who have used [SMKLSSFILL] in the past 30 days (PAST30DAY\_[SMKLSSFILL] = 1) AND who have also smoked cigarettes in the past 30 days (PAST30DAY\_CIGS = 1).

**PATH ID: YS1124**

How likely is someone to become addicted to smokeless tobacco?

- 1 Very unlikely
- 2 Somewhat unlikely
- 3 Neither likely nor unlikely
- 4 Somewhat likely
- 5 Very likely
- 8 DON'T KNOW
- 7 REFUSED

ASK: Respondents who have seen or heard of smokeless tobacco (YS1001 = 1).

**PATH ID: YS1099**

Is using smokeless tobacco less harmful, about the same, or more harmful than smoking cigarettes?

- 1 Less harmful
- 2 About the same
- 3 More harmful
- 8 DON'T KNOW
- 7 REFUSED

ASK: Respondents who have seen or heard of smokeless tobacco (YS1001 = 1).

## Final Youth Baseline Questionnaire - English

**PATH ID: YS1125**

How much do you think people harm themselves when they use smokeless tobacco?

- 1 No harm
- 2 Little harm
- 3 Some harm
- 4 A lot of harm
- 8 DON'T KNOW
- 7 REFUSED

ASK: Respondents who have seen or heard of smokeless tobacco (YS1001 = 1).

**PATH ID: YS1146**

Some smokeless tobacco comes in flavors like menthol, mint, clove, spice, candy, fruit, chocolate, alcohol (such as wine or cognac), or other sweets.

Is flavored smokeless tobacco easier to use, about the same, or harder to use than unflavored smokeless tobacco?

- 1 Easier to use
- 2 About the same
- 3 Harder to use
- 8 DON'T KNOW
- 7 REFUSED

ASK: Respondents who have seen or heard of smokeless tobacco (YS1001 = 1).



## Final Youth Baseline Questionnaire - English

### DISSOLVABLE TOBACCO SECTION

BOX AD1

The next questions ask about another type of tobacco called **dissolvable tobacco**. You don't smoke dissolvable tobacco products – they are made of finely ground flavored tobacco that dissolves in your mouth.

Dissolvable tobacco products come in a variety of shapes, including small round pellets, thin sticks and flat strips. Some common brands are Ariva, Stonewall, or Camel Orbs, Sticks or Strips.

SHOW GENERIC IMAGES OF DISSOLVABLES

**PATH ID: YD1001**

Have you ever seen or heard of dissolvable tobacco before this study?

- 1 Yes
- 2 No GO TO BOX BK1
- 8 DON'T KNOW GO TO BOX BK1
- 7 REFUSED GO TO BOX BK1

ASK: All respondents

SHOW GENERIC IMAGES OF DISSOLVABLES

**PATH ID: YD1002**

Have you ever used dissolvable tobacco products, such as Ariva, Stonewall, or Camel Orbs, Sticks, or Strips, even one or two times?

- 1 Yes GO TO YD1005
- 2 No
- 8 DON'T KNOW
- 7 REFUSED

ASK: Respondents who have seen or heard of dissolvable tobacco (YD1001 = 1).

SHOW GENERIC IMAGES OF DISSOLVABLES

**PATH ID: YD1103**

Have you ever been curious about using dissolvable tobacco?

- 1 Very curious
- 2 Somewhat curious
- 3 A little curious
- 4 Not at all curious
- 8 DON'T KNOW
- 7 REFUSED

ASK: Respondents who have seen or heard of but never used a dissolvable tobacco product. (YD1001 = 1 AND YD1002 = 2, -8 or -7).

## Final Youth Baseline Questionnaire - English

**PATH ID: YD1104**

Do you think you will try dissolvable tobacco soon?

- 1 Definitely yes
- 2 Probably yes
- 3 Probably not
- 4 Definitely not
- 8 DON'T KNOW
- 7 REFUSED

ASK: Respondents who have seen or heard of but never used a dissolvable tobacco product. (YD1001 = 1 AND YD1002 = 2, -8 or -7).

**PATH ID: YD1105**

If one of your best friends were to offer you dissolvable tobacco, would you use it?

- 1 Definitely yes
- 2 Probably yes
- 3 Probably not
- 4 Definitely not
- 8 DON'T KNOW
- 7 REFUSED

ASK: Respondents who have seen or heard of but never used a dissolvable tobacco product. (YD1001 = 1 AND YD1002 = 2, -8 or -7).

GO TO: If respondent has never used dissolvable tobacco (YD1002 = 2, -8 or -7), GO TO YD1124.  
Else GO TO YD1005

**PATH ID: YD1005**

How many pieces of dissolvable tobacco have you used in your entire life?

- 1 1
- 2 2 to 10
- 3 11 to 20
- 4 21 to 50
- 5 51 to 99
- 6 100 or more
- 8 DON'T KNOW
- 7 REFUSED

ASK: Respondents who have used a dissolvable tobacco product (YD1002 = 1).

## Final Youth Baseline Questionnaire - English

**PATH ID: YD1006**

How old were you when you first tried dissolvable tobacco, even one or two times?

- 1 |\_\_|\_\_| GO TO YD1108  
-8 DON'T KNOW  
-7 REFUSED

ASK: Respondents who have used a dissolvable tobacco product (YD1002 = 1).

DISPLAY: Display "Years old" as a title.

**PATH ID: YD1120**

When you first tried dissolvable tobacco, even one or two times, were you...

- 1 Less than 12 years old,  
2 12 to 14 years old, or  
3 15 to 17 years old?  
-8 DON'T KNOW  
-7 REFUSED

ASK: All respondents who refused to give or did not know age (YD1006=-8 OR -7)

**PATH ID: YD1108**

Was the first dissolvable tobacco product you used flavored to taste like menthol, mint, clove, spice, candy, fruit, chocolate, alcohol (such as wine or cognac), or other sweets?

- 1 Yes  
2 No  
-8 DON'T KNOW  
-7 REFUSED

ASK: Respondents who have used a dissolvable tobacco product (YD1002 = 1).

**PATH ID: YD1112**

When did you last use dissolvable tobacco, even one or two times?

- 1 Earlier today  
2 Not today but sometime in the past 7 days  
3 Not in the past 7 days but sometime in the past 30 days  
4 Not in the past 30 days but sometime in the past 6 months GO TO YD1124  
5 Not in the past 6 months but sometime in the past year GO TO YD1124  
6 1 to 4 years ago GO TO YD1124  
7 5 or more years ago GO TO YD1124  
-8 DON'T KNOW GO TO YD1124  
-7 REFUSED GO TO YD1124

ASK: Respondents who have used a dissolvable tobacco product (YD1002 = 1).

## Final Youth Baseline Questionnaire - English

PROGRAM:

CREATE VARIABLES:

**PAST30DAY\_DISS (Past 30 Day Users)**

PAST30DAY\_DISS = 1 Yes, if respondent has used dissolvable tobacco within the past 30 days (YD1112=1 or 2 or 3).

Else PAST30DAY\_DISS = 2 No.

**PAST30DAY\_VL\_DISS (Past 30 Day Very Light Users)**

PAST30DAY\_VL\_DISS = 1 Yes, if respondent has used less than 10 pieces of dissolvable tobacco in lifetime (YD1005=1 or 2) AND last used dissolvable tobacco in the past 30 days (YD1112=1 or 2 or 3).

Else PAST30DAY\_VL\_DISS = 2 No.

**PAST30DAY\_NL\_DISS (Past 30 Day Not Light Users)**

PAST30DAY\_NL\_DISS = 1 Yes, if respondent has used more than 10 pieces of dissolvable tobacco in lifetime (YD1005 > 2) AND last used dissolvable tobacco within the past 30 days (YD1112=1 or 2 or 3).

Else PAST30DAY\_NL\_DISS = 2 No.

**PATH ID: YD1022**

In the past 30 days, on how many days did you use dissolvable tobacco?

1 | \_ | \_ | \_ |

-8 DON'T KNOW

-7 REFUSED

ASK: Respondents who have used a dissolvable tobacco product in the past 30 days (PAST30DAY\_DISS = 1)

PROGRAM: Range check: 1-30 days

**PATH ID: YD1023**

In the past 30 days, on the days you used dissolvable tobacco, how many pieces did you use per day?

1 Less than 1 piece per day

2 1 piece per day

3 2 to 5 pieces per day

4 6 to 10 pieces per day

5 11 to 20 pieces per day

6 More than 20 pieces per day

-8 DON'T KNOW

-7 REFUSED

ASK: Respondents who have used a dissolvable tobacco product in the past 30 days (PAST30DAY\_DISS = 1).

## Final Youth Baseline Questionnaire - English

**PATH ID: YD1130**

In the past 30 days, were any of the dissolvable tobacco products you used flavored to taste like menthol, mint, clove, spice, candy, fruit, chocolate, alcohol (such as wine or cognac), or other sweets?

- 1 Yes
- 2 No
- 8 DON'T KNOW
- 7 REFUSED

ASK: Respondents who have used a dissolvable tobacco product in the past 30 days (PAST30DAY\_DISS = 1).

**PATH ID: YD1123**

In the past 30 days, did anyone refuse to sell you dissolvable tobacco because of your age?

- 1 Yes
- 2 No
- 3 I did not try to buy dissolvable tobacco in the past 30 days
- 8 DON'T KNOW
- 7 REFUSED

ASK: Respondents who have used a dissolvable tobacco product in the past 30 days (PAST30DAY\_DISS = 1).

**PATH ID: YD1118**

In the past 30 days, how did you usually get your own dissolvable tobacco?

- 1 I bought it myself
- 2 I gave someone else money to buy it for me GO TO YD1030
- 3 I asked someone to give me some GO TO YD1047
- 4 Someone offered it to me GO TO YD1047
- 5 I bought it from another person GO TO YD1047
- 6 I took it from a store or another person GO TO YD1047
- 7 I got it some other way GO TO YD1047  
SPECIFY \_\_\_\_\_
- 8 DON'T KNOW GO TO YD1047
- 7 REFUSED GO TO YD1047

ASK: Respondents who have used a dissolvable tobacco product in the past 30 days (PAST30DAY\_DISS = 1).

PROGRAM: If OS field selected and additional OS screen is shown, display question text and add the following text: "Please type your answer using the computer keyboard."

GO TO: If PAST30DAY\_VL\_DISS=1, go to Box YD2

Else go to YD1097.

## Final Youth Baseline Questionnaire - English

**PATH ID: YD1097**

In the past 30 days, did you use a coupon when buying dissolvable tobacco?

- 1 Yes
- 2 No GO TO YD1030
- 8 DON'T KNOW GO TO YD1030
- 7 REFUSED GO TO YD1030

ASK: Respondents who have used dissolvable tobacco in the past 30 days (PAST30DAY\_NL\_DISS = 1) AND tried to buy dissolvable tobacco in the past 30 days (YD1123 NE 3) AND bought dissolvable tobacco themselves in the past 30 days (YD1118=1)

**PATH ID: YD1098**

How many times in the past 30 days have you used a coupon to buy dissolvable tobacco?

- 1
- 8 DON'T KNOW
- 7 REFUSED

ASK: Respondents who have used dissolvable tobacco in the past 30 days (PAST30DAY\_NL\_DISS = 1) AND used a coupon in the past 30 days (YD1097 = 1)

**PATH ID: YD1030**

How do [you/they] usually buy your dissolvable tobacco? Is it...

- 1 In person
- 2 From the internet GO TO YD1047
- 3 By telephone GO TO YD1047
- 8 DON'T KNOW GO TO YD1047
- 7 REFUSED GO TO YD1047

ASK: Respondents who have used dissolvable tobacco in the past 30 days (PAST30DAY\_NL\_DISS = 1) AND indicated that they bought dissolvable tobacco for themselves or that someone else bought dissolvable tobacco for them in the past 30 days (YD1118 = 1 or 2).

PROGRAM: If YD1118=1, display "you"; If YD1118=2, display "they".

**PATH ID: YD1032**

Do [you/they] usually buy dissolvable tobacco...

- 1 In your own state
- 2 In another state
- 3 Outside the US
- 8 DON'T KNOW
- 7 REFUSED

ASK: Respondents who have used dissolvable tobacco in the past 30 days (PAST30DAY\_NL\_DISS = 1) AND indicated that the dissolvable tobacco they bought for themselves or that someone else bought for them was purchased in person (YD1030 = 1).

PROGRAM: If YD1118=1, display "you"; If YD1118=2, display "they"

## Final Youth Baseline Questionnaire - English

**PATH ID: YD1033**

Where do [you/they] buy your dissolvable tobacco most of the time?

- 1 A convenience store or gas station
- 2 A supermarket, grocery store, or drug store
- 3 A warehouse club, such as Sam's or Costco
- 4 A smoke shop, tobacco specialty store or tobacco outlet store
- 5 A duty free shop or military commissary
- 6 A bar, pub, restaurant or casino
- 7 A friend or relative [DISPLAY IF YD1118 = 1]
- 8 A swap meet or flea market
- 9 Or from somewhere else SPECIFY: \_\_\_\_\_
- 8 DON'T KNOW
- 7 REFUSED

ASK: Respondents who have used dissolvable tobacco in the past 30 days (PAST30DAY\_NL\_DISS = 1) AND indicated that the dissolvable tobacco they bought for themselves or that someone else bought for them was purchased in person (YD1030 = 1).

PROGRAM: If YD1118=1, display "you"; If YD1118=2, display "they"

If YD1118=1, display option 7=' A friend or relative,' if YD1118 NE 1, hide option 7.

If OS field selected and additional OS screen is shown, display question text and add the following text: "Please type your answer using the computer keyboard."

**PATH ID: YD1047**

Do you have a regular brand of dissolvable tobacco that you usually use?

- 1 Yes
- 2 No
- 8 DON'T KNOW
- 7 REFUSED

ASK: Respondents who have used a dissolvable tobacco product in the past 30 days (PAST30DAY\_NL\_DISS = 1).

## Final Youth Baseline Questionnaire - English

**PATH ID: YD1048**

What brand of dissolvable tobacco [do I did] you [usually I last] use? Please select it from the choices below by touching the screen. [ If you do not see it below, touch the button marked "NEXT". I If you do not see it below, touch the button marked "Something else". ]

**PROGRAM:**

**[If multiple screens]** Display: If you do not see it below, touch the button marked "NEXT".

**[If single screen OR last screen of multiple screens]** Display: If you do not see it below, touch the box marked "Something else".

[SHOW PICTURES OF THE MAJOR BRANDS ON THE TOUCHSCREEN. WHEN A RESPONDENT SELECTS A BRAND, GO TO YD1070]

- |    |                |              |
|----|----------------|--------------|
| 1  | Something else | GO TO YD1049 |
| -8 | DON'T KNOW     | GO TO YD1060 |
| -7 | REFUSED        | GO TO YD1060 |

ASK: Respondents who have used a dissolvable tobacco product in the past 30 days (PAST30DAY\_NL\_DISS = 1).

PROGRAM: If YD1047=1, display "do" and "usually". If YD1047=2, DK or RF, display "did" and "last"

**PATH ID: YD1070**

You selected [BRANDFILL] as your brand. What kind of [BRANDFILL] [do I did] you [usually I last] use? Please select it from the choices below by touching the screen. [ If you do not see it below, touch the button marked "NEXT". I If you do not see it below, touch the button marked "Something else". ]

**PROGRAM:**

**[If multiple screens]** Display: If you do not see it below, touch the button marked "NEXT".

**[If single screen OR last screen of multiple screens]** Display: If you do not see it below, touch the box marked "Something else".

[SHOW PICTURES OR TEXT ON THE TOUCHSCREEN OF THE MAJOR PRODUCTS ASSOCIATED WITH BRAND SELECTED IN YD1048]

- |    |                |              |
|----|----------------|--------------|
| 1  | Something else | GO TO YD1071 |
| -8 | DON'T KNOW     | GO TO YD1060 |
| -7 | REFUSED        | GO TO YD1060 |

ASK: Respondents who have used a dissolvable tobacco product in the past 30 days (PAST30DAY\_NL\_DISS = 1) and selected a brand image in YD1048.

PROGRAM: If YD1047=1, display "do" and "usually". If YD1047=2, DK or RF, display "did" and "last"

**PATH ID: YD1049**

You said that your brand was not pictured. What is it?

- |    |            |              |
|----|------------|--------------|
| 1  | _____      | GO TO YD1060 |
| -8 | DON'T KNOW | GO TO YD1060 |
| -7 | REFUSED    | GO TO YD1060 |

ASK: Respondents who have used dissolvable tobacco in the past 30 days (PAST30DAY\_NL\_DISS = 1) AND did not select an image for their brand (YD1048 = 1).



## Final Youth Baseline Questionnaire - English

**PATH ID: YD1071**

You said that the type of [BRANDFILL]s that you use was not pictured. What type is it?

- 1 \_\_\_\_\_
- 8 DON'T KNOW
- 7 REFUSED

ASK: Respondents who have used a dissolvable tobacco product in the past 30 days (PAST30DAY\_NL\_DISS = 1) who did not select the type of product they use (YD1070="Something else") but who DID select a brand (YD1048<>1, -8, -7). Do not ask of respondents who wrote a brand into YD1049.

Box YD2

Display question YD1060, YD1061, YD1085, YD1062, YD1075, YD1063, YD1064, YD1065, YD1067, YD1068, YD1076, YD1072, YD1074 on one screen. Show the intro/transition text from YD1060 first, then show each item with a Y/N response. As each item is answered, show the next one.

PROGRAM: Randomize order of YD1060 through YD1074.

**PATH ID: YD1060**

The next questions are about the reasons people use dissolvable tobacco. Please select which reasons apply to you.

I use dissolvable tobacco because...

It is affordable.

- 1 Yes
- 2 No
- 8 DON'T KNOW
- 7 REFUSED

ASK: Respondents who have used a dissolvable tobacco product in the past 30 days (PAST30DAY\_DISS = 1).

**PATH ID: YD1061**

People in the media or other public figures use dissolvable tobacco.

- 1 Yes
- 2 No
- 8 DON'T KNOW
- 7 REFUSED

ASK: Respondents who have used a dissolvable tobacco product in the past 30 days (PAST30DAY\_DISS = 1).

## Final Youth Baseline Questionnaire - English

**PATH ID: YD1085**

I can use dissolvable tobacco at times when or in places where smoking cigarettes isn't allowed.

- 1 Yes
- 2 No
- 8 DON'T KNOW
- 7 REFUSED

ASK: Respondents who have used a dissolvable tobacco product in the past 30 days  
(PAST30DAY\_DISS = 1).

**PATH ID: YD1062**

It might be less harmful to me than cigarettes.

- 1 Yes
- 2 No
- 8 DON'T KNOW
- 7 REFUSED

ASK: Respondents who have used a dissolvable tobacco product in the past 30 days  
(PAST30DAY\_DISS = 1).

**PATH ID: YD1075**

It might be less harmful to people around me than cigarettes.

- 1 Yes
- 2 No
- 8 DON'T KNOW
- 7 REFUSED

ASK: Respondents who have used a dissolvable tobacco product in the past 30 days  
(PAST30DAY\_DISS = 1).

**PATH ID: YD1063**

Dissolvable tobacco comes in flavors I like.

- 1 Yes
- 2 No
- 8 DON'T KNOW
- 7 REFUSED

ASK: Respondents who have used a dissolvable tobacco product in the past 30 days  
(PAST30DAY\_DISS = 1).

## Final Youth Baseline Questionnaire - English

**PATH ID: YD1064**

Using dissolvable tobacco helps people to quit smoking cigarettes.

- 1 Yes
- 2 No
- 8 DON'T KNOW
- 7 REFUSED

ASK: Respondents who have used a dissolvable tobacco product in the past 30 days (PAST30DAY\_DISS = 1).

**PATH ID: YD1065**

Dissolvable tobacco doesn't smell.

- 1 Yes
- 2 No
- 8 DON'T KNOW
- 7 REFUSED

ASK: Respondents who have used a dissolvable tobacco product in the past 30 days (PAST30DAY\_DISS = 1).

**PATH ID: YD1067**

Dissolvable tobacco doesn't bother non-tobacco users.

- 1 Yes
- 2 No
- 8 DON'T KNOW
- 7 REFUSED

ASK: Respondents who have used a dissolvable tobacco product in the past 30 days (PAST30DAY\_DISS = 1).

**PATH ID: YD1068**

People who are important to me use dissolvable tobacco.

- 1 Yes
- 2 No
- 8 DON'T KNOW
- 7 REFUSED

ASK: Respondents who have used a dissolvable tobacco product in the past 30 days (PAST30DAY\_DISS = 1).

## Final Youth Baseline Questionnaire - English

**PATH ID: YD1076**

No one can tell when I am using dissolvable tobacco.

- 1 Yes
- 2 No
- 8 DON'T KNOW
- 7 REFUSED

ASK: Respondents who have used dissolvable tobacco in the past 30 days (PAST30DAY\_DISS = 1).

**PATH ID: YD1072**

The advertising for dissolvable tobacco appeals to me.

- 1 Yes
- 2 No
- 8 DON'T KNOW
- 7 REFUSED

ASK: Respondents who have used dissolvable tobacco in the past 30 days (PAST30DAY\_DISS = 1).

**PATH ID: YD1074**

It reminds me of candy.

- 1 Yes
- 2 No
- 8 DON'T KNOW
- 7 REFUSED

ASK: Respondents who have used dissolvable tobacco in the past 30 days (PAST30DAY\_DISS = 1).

**PATH ID: YD1086**

In the past 30 days, have you used dissolvable tobacco products at times when or in places where you could not smoke cigarettes?

- 1 Yes
- 2 No
- 8 DON'T KNOW
- 7 REFUSED

ASK: Respondents who have used a dissolvable tobacco product in the past 30 days (PAST30DAY\_DISS = 1) AND who have also smoked cigarettes in the past 30 days (PAST30DAY\_CIGS = 1).

## Final Youth Baseline Questionnaire - English

**PATH ID: YD1124**

How likely is someone to become addicted to dissolvable tobacco?

- 1 Very unlikely
- 2 Somewhat unlikely
- 3 Neither likely nor unlikely
- 4 Somewhat likely
- 5 Very likely
- 8 DON'T KNOW
- 7 REFUSED

ASK: Respondents who have seen or heard of dissolvable tobacco (YD1001 = 1).

**PATH ID: YD1099**

Is using dissolvable tobacco less harmful, about the same, or more harmful than smoking cigarettes?

- 1 Less harmful
- 2 About the same
- 3 More harmful
- 8 Don't know
- 7 refused

ASK: Respondents who have seen or heard of dissolvable tobacco (YD1001 = 1).

**PATH ID: YD1125**

How much do you think people harm themselves when they use dissolvable tobacco?

- 1 No harm
- 2 Little harm
- 3 Some harm
- 4 A lot of harm
- 8 DON'T KNOW
- 7 REFUSED

ASK: Respondents who have seen or heard of dissolvable tobacco (YD1001 = 1).

**PATH ID: YD1146**

Some dissolvable tobacco comes in flavors like menthol, mint, clove, spice, candy, fruit, chocolate, alcohol (such as wine or cognac), or other sweets.

Is flavored dissolvable tobacco easier to use, about the same, or harder to use than unflavored dissolvable tobacco?

- 1 Easier to use
- 2 About the same
- 3 Harder to use
- 8 DON'T KNOW
- 7 REFUSED

ASK: Respondents who have seen or heard of dissolvable tobacco (YD1001 = 1).

## Final Youth Baseline Questionnaire - English

### BIDIS AND KRETEKS SECTION

Box BK1

The next questions are about smoking **bidis or kreteks**. Bidis are small brown cigarettes wrapped in a leaf and typically tied on one or both ends with string. Kreteks are clove cigarettes.

SHOW GENERIC IMAGE OF BIDIS AND KRETEKS

**PATH ID: YB9101**

Which of the following tobacco products have you ever seen or heard of before this study? Choose all that apply.

- 1 Bidis
- 2 Kreteks
- 3 Never seen or heard of either of these products
- 8 DON'T KNOW
- 7 REFUSED

ASK: All respondents.

SHOW GENERIC IMAGE OF BIDIS AND KRETEKS

PROGRAM: Option 3 cannot be selected if options 1 or 2 are selected.

GO TO: If respondent has heard of bidis or kreteks, go to YB9102

If respondent has never seen or heard of either bidis or kreteks (YB9101=3, -8 or -7) and has used 2 or more products and the youngest age and first tried was equal for 2 or more of the products, skip to First Tobacco Product section

Else, skip to Reasons To Use Tobacco section.

**PATH ID: YB9102**

Which of the following tobacco products have you ever tried, even one or two times? Choose all that apply.

- 1 Bidis GO TO BOX YB2
- 2 Kreteks GO TO BOX YB2
- 3 Never tried either of these products
- 8 DON'T KNOW
- 7 REFUSED

ASK: Respondents who have heard of at least 1 of the products (YB9101 = 1 OR 2).

SHOW GENERIC IMAGE OF BIDIS AND KRETEKS

PROGRAM: Option 3 cannot be selected if options 1 or 2 are selected.

## Final Youth Baseline Questionnaire - English

**PATH ID: YB1103**

Have you ever been curious about smoking a bidi or a kretek?

- 1 Very curious
- 2 Somewhat curious
- 3 A little curious GO TO YB1104
- 4 Not at all curious GO TO YB1104
- 8 DON'T KNOW
- 7 REFUSED

ASK: Respondents who have heard of any of these products but have not smoked any of them (YB9101 = 1 or 2 AND YB9102 = 3, -8 or -7).

**PATH ID: YB9103**

Which product are you curious about smoking? Choose all that apply.

- 1 Bidi
- 2 Kretek
- 8 DON'T KNOW
- 7 REFUSED

ASK: Respondents who respond 'very curious' or 'somewhat curious' (YB1103 = 1 or 2).

**PATH ID: YB1104**

Do you think you will try bidis or kreteks soon?

- 1 Definitely yes
- 2 Probably yes
- 3 Probably not GO TO YB1105
- 4 Definitely not GO TO YB1105
- 8 DON'T KNOW
- 7 REFUSED

ASK: Respondents who have heard of any of these products but have not smoked any of them (YB9101 = 1 or 2 AND YB9102 = 3, -8 or -7).

**PATH ID: YB9104**

Which one do you think you will try soon? Choose all that apply.

- 1 Bidi
- 2 Kretek
- 8 DON'T KNOW
- 7 REFUSED

ASK: Respondents who respond 'definitely yes' or 'probably yes' (YB1104 = 1 or 2).

## Final Youth Baseline Questionnaire - English

**PATH ID: YB1105**

If one of your best friends were to offer you a bidi or kretek, would you smoke it?

- 1 Definitely yes
- 2 Probably yes
- 3 Probably not GO TO BOX YB2
- 4 Definitely not GO TO BOX YB2
- 8 DON'T KNOW
- 7 REFUSED

ASK: Respondents who have heard of any of these products but have not smoked any of them (YB9101 = 1 or 2 AND YB9102 = 3, -8 or -7).

**PATH ID: YB9105**

Which one would you smoke if your best friends offered it? Choose all that apply.

- 1 Bidi
- 2 Kretek
- 8 DON'T KNOW
- 7 REFUSED

ASK: Respondents who respond 'definitely yes' or 'probably yes' (YB1105 = 1 or 2).

GO TO: If respondent has never smoked a bidi or kretek (YB9102 = 3, -8 or -7), GO TO Box YB4.

Else GO TO Box YB2

**PATH ID: BOX YB2**

PROGRAM: [BKFILL] Series

If respondent has smoked a bidi ((YB9102(1)=1), fill [BKFILL] with "bidi".

If respondent has smoked a kretek ((YB9102(2)=1), fill [BKFILL] with "kretek".

If respondent has smoked both a bidi AND a kretek ((YB9102(1)=1 AND YB9102(2)=1)), ask section once using fill [BKFILL] "bidi", then repeat questions YB1005 through YB1146 a second time using fill [BKFILL] "kretek".

At the start of the bidi loop, display the following text: "These next questions are about **bidis**. Please think only about your use of bidis as you answer these questions. We will ask about kreteks later."

[SHOW GENERIC IMAGE OF BIDIS]

At the start of the kretek loop, display the following text: "Now we'd like to ask you about **kreteks**. Please think only about your use of kreteks as you answer these questions."

[SHOW GENERIC IMAGE OF KRETEKS]



## Final Youth Baseline Questionnaire - English

**PATH ID: YB1005**

How many [BKFILL]s have you smoked in your entire life?

- 1 1 or more puffs but never a whole one
- 2 1
- 3 2 to 10
- 4 11 to 20
- 5 21 to 50
- 6 51 to 99
- 7 100 or more
- 8 DON'T KNOW
- 7 REFUSED

ASK: Respondents who have ever smoked a [BKFILL] (YB9102 ne 3, -8 or -7).

**PATH ID: YB1006**

How old were you when you first tried a [BKFILL], even one or two puffs?

- 1 |\_\_|\_\_| GO TO YB1108
- 8 DON'T KNOW
- 7 REFUSED

ASK: Respondents who have ever smoked a [BKFILL] (YB9102 ne 3, -8 or -7).

PROGRAM: Allow 2 digits for age.

DISPLAY: Display "Years old" as a title.

**PATH ID: YB1120**

When you first tried a [BKFILL], were you...

- 1 Less than 12 years old,
- 2 12 to 14 years old, or
- 3 15 to 17 years old?
- 8 DON'T KNOW
- 7 REFUSED

ASK: All respondents who refused to give or did not know age (YB1006=-8 OR -7)

**PATH ID: YB1108**

Was the first [BKFILL] you smoked flavored to taste like menthol, mint, clove, spice, candy, fruit, chocolate, alcohol (such as wine or cognac), or other sweets?

- 1 Yes
- 2 No
- 8 DON'T KNOW
- 7 REFUSED

ASK: Respondents who have ever smoked a [BKFILL] (YB9102 ne 3, -8 or -7).

## Final Youth Baseline Questionnaire - English

**PATH ID: YB1112**

When was the last time you smoked a [BKFILL], even one or two puffs?

- |    |                                                           |               |
|----|-----------------------------------------------------------|---------------|
| 1  | Earlier today                                             |               |
| 2  | Not today but sometime in the past 7 days                 |               |
| 3  | Not in the past 7 days but sometime in the past 30 days   |               |
| 4  | Not in the past 30 days but sometime in the past 6 months | GO TO BOX YB4 |
| 5  | Not in the past 6 months but sometime in the past year    | GO TO BOX YB4 |
| 6  | 1 to 4 years ago                                          | GO TO BOX YB4 |
| 7  | 5 or more years                                           | GO TO BOX YB4 |
| -8 | DON'T KNOW                                                | GO TO BOX YB4 |
| -7 | REFUSED                                                   | GO TO BOX YB4 |

ASK: Respondents who have ever smoked a [BKFILL] (YB9102 ne 3, -8 or -7).

PROGRAM:

CREATE VARIABLES:

**PAST30DAY\_[BKFILL] (Past 30 Day Users)**

PAST30DAY\_[BKFILL] = 1 Yes, if respondent has smoked a [BKFILL] within the past 30 days (YB1112=1 or 2 or 3).

Else PAST30DAY\_[BKFILL] = 2 No.

**PAST30DAY\_VL\_[BKFILL] (Past 30 Day Very Light Users)**

PAST30DAY\_VL\_[BKFILL] = 1 Yes, if respondent has smoked less than 10 [BKFILL]s in lifetime (YB1005=1 or 2 or 3) AND last smoked a [BKFILL] in the past 30 days (YB1112=1 or 2 or 3).

Else PAST30DAY\_VL\_[BKFILL] = 2 No.

**PAST30DAY\_NL\_[BKFILL] (Past 30 Day Not Light Users)**

PAST30DAY\_NL\_[BKFILL] = 1 Yes, if respondent has smoked more than 10 [BKFILL]s in lifetime (YB1005 > 3) AND last smoked a [BKFILL] within the past 30 days (YB1112=1 or 2 or 3).

Else PAST30DAY\_NL\_[BKFILL] = 2 No.

**PATH ID: YB1022**

In the past 30 days, on how many days did you smoke a [BKFILL]?

- |    |            |
|----|------------|
| 1  | _ _        |
| -8 | DON'T KNOW |
| -7 | REFUSED    |

ASK: Respondents who have ever smoked a [BKFILL] in the past 30 days (PAST30DAY\_[BKFILL] = 1)

PROGRAM: Range check 1-30 days

## Final Youth Baseline Questionnaire - English

**PATH ID: YB1023**

In the past 30 days, on the days you smoked a [BKFILL], how many [BKFILL]s did you smoke per day?

- 1 Less than 1 [BKFILL] per day
- 2 1 [BKFILL] per day
- 3 2 to 5 [BKFILL]s per day
- 4 6 to 10 [BKFILL]s per day
- 5 11 to 20 [BKFILL]s per day
- 6 More than 20 [BKFILL]s per day
- 8 DON'T KNOW
- 7 REFUSED

ASK: Respondents who have smoked a [BKFILL] in the past 30 days (PAST30DAY\_[BKFILL] = 1).

**PATH ID: YB1130**

In the past 30 days, were any of the [BKFILL]s you smoked flavored to taste like menthol, mint, clove, spice, candy, fruit, chocolate, alcohol (such as wine or cognac), or other sweets?

- 1 Yes
- 2 No
- 8 DON'T KNOW
- 7 REFUSED

ASK: Respondents who have smoked a [BKFILL] in the past 30 days (PAST30DAY\_[BKFILL] = 1).

**PATH ID: YB1123**

In the past 30 days, did anyone refuse to sell you [BKFILL]s because of your age?

- 1 Yes
- 2 No
- 3 I did not try to buy [BKFILL]s in the past 30 days
- 8 DON'T KNOW
- 7 REFUSED

ASK: Respondents who have smoked a [BKFILL] in the past 30 days (PAST30DAY\_[BKFILL] = 1).

## Final Youth Baseline Questionnaire - English

**PATH ID: YB1118**

In the past 30 days, how did you usually get your own [BKFFILL]s?

- |    |                                              |              |
|----|----------------------------------------------|--------------|
| 1  | I bought them myself                         |              |
| 2  | I gave someone else money to buy them for me | GO TO YB1030 |
| 3  | I asked someone to give me one               | GO TO YB1047 |
| 4  | Someone offered them to me                   | GO TO YB1047 |
| 5  | I bought them from another person            | GO TO YB1047 |
| 6  | I took them from a store or another person   | GO TO YB1047 |
| 7  | I got them some other way                    | GO TO YB1047 |
|    | SPECIFY _____                                |              |
| -8 | DON'T KNOW                                   | GO TO YB1047 |
| -7 | REFUSED                                      | GO TO YB1047 |

ASK: Respondents who have smoked a [BKFFILL] in the past 30 days (PAST30DAY\_[BKFFILL] = 1).

PROGRAM: If OS field selected and additional OS screen is shown, display question text and add the following text: "Please type your answer using the computer keyboard."

GO TO: If PAST30DAY\_VL\_[BKFFILL]=1, go to Box YB3

Else go to YB1097.

**PATH ID: YB1097**

In the past 30 days, did you use a coupon when buying [BKFFILL]s?

- |    |            |              |
|----|------------|--------------|
| 1  | Yes        |              |
| 2  | No         | GO TO YB1030 |
| -8 | DON'T KNOW | GO TO YB1030 |
| -7 | REFUSED    | GO TO YB1030 |

ASK: Respondents who have smoked a [BKFFILL] in the past 30 days (PAST30DAY\_NL\_[BKFFILL] = 1) AND tried to buy [BKFFILL]s in the past 30 days (YB1123 NE 3) AND bought [BKFFILL]s themselves in the past 30 days (YB1118=1)

**PATH ID: YB1098**

How many times in the past 30 days have you used a coupon to buy [BKFFILL]s?

- |    |            |  |
|----|------------|--|
| 1  | _ _        |  |
| -8 | DON'T KNOW |  |
| -7 | REFUSED    |  |

ASK: Respondents who have smoked a [BKFFILL] in the past 30 days (PAST30DAY\_NL\_[BKFFILL] = 1) AND used a coupon in the past 30 days (YB1097 = 1)

## Final Youth Baseline Questionnaire - English

**PATH ID: YB1030**

How do [you/they] usually buy your [BKFFILL]s? Is it...

- 1 In person
- 2 From the internet GO TO YB1047
- 3 By telephone GO TO YB1047
- 8 DON'T KNOW GO TO YB1047
- 7 REFUSED GO TO YB1047

ASK: Respondents who have smoked a [BKFFILL] in the past 30 days (PAST30DAY\_NL\_[BKFFILL] = 1) AND indicated that they bought [BKFFILL]s for themselves or that someone else bought [BKFFILL]s for them in the past 30 days (YB1118 = 1 or 2).

PROGRAM: If YB1118=1, display "you"; If YB1118=2, display "they"

**PATH ID: YB1032**

Do [you/they] usually buy [BKFFILL]s...

- 1 In your own state
- 2 In another state
- 3 Outside the US
- 8 DON'T KNOW
- 7 REFUSED

ASK: Respondents who have smoked a [BKFFILL] in the past 30 days (PAST30DAY\_NL\_[BKFFILL] = 1) AND indicated that the [BKFFILL]s they bought for themselves or that someone else bought for them was purchased in person (YB0130 = 1).

PROGRAM: If YB1118=1, display "you"; If YB1118=2, display "they"

**PATH ID: YB1033**

Where do [you/they] buy your [BKFFILL]s most of the time?

- 1 A convenience store or gas station
- 2 A supermarket, grocery store, or drug store
- 3 A warehouse club, such as Sam's or Costco
- 4 A smoke shop, tobacco specialty store or tobacco outlet store
- 5 A duty free shop or military commissary
- 6 A bar, pub, restaurant or casino
- 7 A friend or relative [DISPLAY IF YB1118 = 1]
- 8 A swap meet or flea market
- 9 Or from somewhere else SPECIFY: \_\_\_\_\_
- 8 DON'T KNOW
- 7 REFUSED

ASK: Respondents who have smoked a [BKFFILL] in the past 30 days (PAST30DAY\_NL\_[BKFFILL] = 1) AND indicated that the [BKFFILL] they bought for themselves or that someone else bought for them was purchased in person (YB1030 = 1).

PROGRAM: If YB1118=1, display "you"; If YB1118=2, display "they"

If YB1118=1, display option 7=' A friend or relative,' if YB1118 NE 1, hide option 7.

If OS field selected and additional OS screen is shown, display question text and add the following text: "Please type your answer using the computer keyboard."

## Final Youth Baseline Questionnaire - English

**PATH ID: YB1047**

Do you have a regular brand of [BKFILL]s that you usually smoke?

- 1 Yes
- 2 No
- 8 DON'T KNOW
- 7 REFUSED

ASK: Respondents who have smoked a [BKFILL] in the past 30 days (PAST30DAY\_NL\_[BKFILL] = 1).

**PATH ID: YB1048**

What brand of [BKFILL] [do I did] you [usually I last] smoke? Please select it from the choices below by touching the screen. [ If you do not see it below, touch the button marked "NEXT". I If you do not see it below, touch the button marked "Something else." ]

**PROGRAM:**

**[If multiple screens]** Display: If you do not see it below, touch the button marked "NEXT".

**[If single screen OR last screen of multiple screens]** Display: If you do not see it below, touch the box marked "Something else".

[SHOW PICTURES OF THE MAJOR BRANDS ON THE TOUCHSCREEN. WHEN A RESPONDENT SELECTS A BRAND, GO TO YB1070]

- |    |                |              |
|----|----------------|--------------|
| 1  | Something else | GO TO YB1049 |
| -8 | DON'T KNOW     | GO TO YB1060 |
| -7 | REFUSED        | GO TO YB1060 |

ASK: Respondents who have smoked a kretek [BKFILL=kretek] in the past 30 days (PAST30DAY\_NL\_[BKFILL] = 1). This question is skipped for respondents who have smoked a bidi [BKFILL=bidi].

PROGRAM: If YB1047=1, display "do" and "usually". If YB1047=2, DK or RF, display "did" and "last"

## Final Youth Baseline Questionnaire - English

### PATH ID: YB1070

You selected [BRANDFILL] as your brand. What kind of [BRANDFILL] [do I did] you [usually I last] smoke? Please select it from the choices below by touching the screen. [ If you do not see it below, touch the button marked "NEXT". I If you do not see it below, touch the box marked "Something else". ]

#### PROGRAM:

[If multiple screens] Display: If you do not see it below, touch the button marked "NEXT".

[If single screen OR last screen of multiple screens] Display: If you do not see it below, touch the box marked "Something else".

[SHOW PICTURES OR TEXT ON THE TOUCHSCREEN OF THE MAJOR PRODUCTS ASSOCIATED WITH BRAND SELECTED IN YB1048]

- |    |                |              |
|----|----------------|--------------|
| 1  | Something else | GO TO YB1071 |
| -8 | DON'T KNOW     | GO TO YB1060 |
| -7 | REFUSED        | GO TO YB1060 |

ASK: Respondents who have smoked a kretek [BKFill=kretek] in the past 30 days (PAST30DAY\_NL\_[BKFill] = 1) and selected a brand image in YB1048. This question is skipped for respondents who have smoked a bidi [BKFill=bidi].

PROGRAM: If YB1047=1, display "do" and "usually". If YB1047=2, DK or RF, display "did" and "last"

### PATH ID: YB1049

[You said that your brand was not pictured. What is it? I What brand of bidi [do I did] you [usually I last] smoke? Please type your answer using the computer keyboard. ]

- |    |            |              |
|----|------------|--------------|
| 1  | _____      | GO TO YB1060 |
| -8 | DON'T KNOW | GO TO YB1060 |
| -7 | REFUSED    | GO TO YB1060 |

ASK: Respondents who have smoked a [BKFill] in the past 30 days (PAST30DAY\_NL\_[BKFill] = 1) AND did not select an image for their brand (YB1048 = 1).

PROGRAM: If respondent uses kreteks (BKFill=kretek), display "You said that your brand was not pictured. What is it?". If respondent uses bidis (BKFill=bidi), display: What brand of bidi [do I did] you [usually I last] smoke? Please type your answer using the computer keyboard. If YB1047BD=1, display "do" and "usually". If YB1047BD=2, DK or RF, display "did" and "last"

### PATH ID: YB1071

You said that the type of [BRANDFILL]s that you smoke was not pictured. What type is it?

- |    |            |  |
|----|------------|--|
| 1  | _____      |  |
| -8 | DON'T KNOW |  |
| -7 | REFUSED    |  |

ASK: Respondents who have smoked a kretek [BKFill=kretek] in the past 30 days (PAST30DAY\_NL\_[BKFill] = 1) who did not select the type of product they use (YB1070="Something else") but who DID select a brand (YB1048<>1, -8, -7).

PROGRAM: Do not ask of respondents who wrote a brand into YB1049. Do not ask of respondents who have smoked a bidi [BKFill=bidi]

## Final Youth Baseline Questionnaire - English

Box YB3

Display question YB1060, YB1061, YB1085, YB1062, YB1063, YB1064, YB1066, YB1068, YB1072 on one screen. Show the intro/transition text from YB1060 first, then show each item with a Y/N response. As each item is answered, show the next one.

PROGRAM: Randomize order of YB1060 through YB1072.

### PATH ID: YB1060

The next questions are about the reasons people smoke [BKFFILL]s. Please select which reasons apply to you.

I smoke [BKFFILL]s because...

They are affordable.

- 1 Yes
- 2 No
- 8 DON'T KNOW
- 7 REFUSED

ASK: Respondents who have smoked a [BKFFILL] in the past 30 days (PAST30DAY\_[BKFFILL] = 1).

### PATH ID: YB1061

People in the media or other public figures smoke [BKFFILL]s.

- 1 Yes
- 2 No
- 8 DON'T KNOW
- 7 REFUSED

ASK: Respondents who have smoked a [BKFFILL] in the past 30 days (PAST30DAY\_[BKFFILL] = 1).

### PATH ID: YB1085

I can smoke [BKFFILL]s at times when or in places where smoking cigarettes isn't allowed.

- 1 Yes
- 2 No
- 8 DON'T KNOW
- 7 REFUSED

ASK: Respondents who have smoked a [BKFFILL] in the past 30 days (PAST30DAY\_[BKFFILL] = 1).

### PATH ID: YB1062

They might be less harmful than cigarettes.

- 1 Yes
- 2 No
- 8 DON'T KNOW
- 7 REFUSED

ASK: Respondents who have smoked a [BKFFILL] in the past 30 days (PAST30DAY\_[BKFFILL] = 1).



## Final Youth Baseline Questionnaire - English

**PATH ID: YB1063**

[BKFILL]s come in flavors I like.

- 1 Yes
- 2 No
- 8 DON'T KNOW
- 7 REFUSED

ASK: Respondents who have smoked a [BKFILL] in the past 30 days (PAST30DAY\_[BKFILL] = 1).

**PATH ID: YB1064**

Smoking [BKFILL]s helps people to quit smoking cigarettes.

- 1 Yes
- 2 No
- 8 DON'T KNOW
- 7 REFUSED

ASK: Respondents who have smoked a [BKFILL] in the past 30 days (PAST30DAY\_[BKFILL] = 1).

**PATH ID: YB1066**

Smoking a [BKFILL] feels like smoking a cigarette.

- 1 Yes
- 2 No
- 8 DON'T KNOW
- 7 REFUSED

ASK: Respondents who have smoked a [BKFILL] in the past 30 days (PAST30DAY\_[BKFILL] = 1).

**PATH ID: YB1068**

People who are important to me smoke [BKFILL]s.

- 1 Yes
- 2 No
- 8 DON'T KNOW
- 7 REFUSED

ASK: Respondents who have smoked a [BKFILL] in the past 30 days (PAST30DAY\_[BKFILL] = 1).

**PATH ID: YB1072**

The advertising for [BKFILL]s appeals to me.

- 1 Yes
- 2 No
- 8 DON'T KNOW
- 7 REFUSED

ASK: Respondents who have smoked a [BKFILL] in the past 30 days (PAST30DAY\_[BKFILL] = 1).

## Final Youth Baseline Questionnaire - English

BOX YB4

PROGRAM:

(a) For respondents who have smoked a [BKFILL], do not display any transition here. There should be no interruption/transition in the loops for bidi/kretek users.

(b) For respondents who have never smoked a bidi or kretek, but has heard of either a kretek OR bidi, transition text is displayed here before moving on to YB1124.

(c) For respondents who have never smoked a bidi or kretek, but has heard of a kretek AND a bidi, transition text is displayed here, then questions YB1124-YB1146 are repeated in a loop for each product selected. If YB9101=1, fill [BKHEARD] with "bidi"; if YB9101=2, fill [BKHEARD] with "kretek". Repeat each series as applicable.

DISPLAY INSTRUCTIONS FOR TRANSITION TEXT:

(a) N/A (no interruption or transition)

(b1) If a respondent has never smoked bidis or kreteks (YB9102=3), but has heard of only bidis (((YB9101(1)=1 AND YB9101(2 and 3)=2, -8 or -7))), display the following transition text:

"These next questions are about bidis. Please think only about bidis as you answer these questions."

[SHOW GENERIC IMAGE OF BIDIS]

(b2) If a respondent has never smoked bidis or kreteks (YB9102=3), but has heard of only kreteks (((YB9101(2)=1 AND YB9101(1 and 3)=2, -8 or -7))), display the following transition text:

"These next questions are about kreteks. Please think only about kreteks as you answer these questions."

[SHOW GENERIC IMAGE OF KRETEKS]

(c) If a respondent has never smoked either bidis or kreteks (YB9102=3), but has heard of both bidis AND kreteks ((YB9101(1 AND 2)=1)), display the following text for the first loop through YB1124-YB1146 asking about bidis first:

"These next questions are about bidis. Please think only about bidis as you answer these questions. We will ask about kreteks later."

[SHOW GENERIC IMAGE OF BIDIS]

Then display the following text for the second loop through YB1124-YB1146 asking about kreteks:

"Now we'd like to ask you about kreteks. Please think only about kreteks as you answer these questions."

[SHOW GENERIC IMAGE OF KRETEKS]

## Final Youth Baseline Questionnaire - English

**PATH ID: YB1124**

How likely is someone to become addicted to [BKHEARD]s?

- 1 Very unlikely
- 2 Somewhat unlikely
- 3 Neither likely or unlikely
- 4 Somewhat likely
- 5 Very likely
- 8 DON'T KNOW
- 7 REFUSED

ASK: Respondents who have heard of at least 1 of the products (YB9101 = 1 OR 2).

**PATH ID: YB1099**

Is smoking a [BKHEARD] less harmful, about the same, or more harmful than smoking cigarettes?

- 1 Less harmful
- 2 About the same
- 3 More harmful
- 8 DON'T KNOW
- 7 REFUSED

ASK: Respondents who have heard of at least 1 of the products (YB9101 = 1 OR 2).

**PATH ID: YB1125**

How much do you think people harm themselves when they smoke a [BKHEARD]?

- 1 No harm
- 2 Little harm
- 3 Some harm
- 4 A lot of harm
- 8 DON'T KNOW
- 7 REFUSED

ASK: Respondents who have heard of at least 1 of the products (YB9101 = 1 OR 2).

## Final Youth Baseline Questionnaire - English

**PATH ID: YB1146**

Some [BKHEARD]s come in flavors like menthol, mint, clove, spice, candy, fruit, chocolate, alcohol (such as wine or cognac), or other sweets.

Are flavored [BKHEARD]s easier to smoke, about the same, or harder to smoke than unflavored [BKHEARD]s?

- 1 Easier to smoke
- 2 About the same
- 3 Harder to smoke
- 8 DON'T KNOW
- 7 REFUSED

ASK: Respondents who have heard of at least 1 of the products (YB9101 = 1 OR 2).

GO TO: If respondent has used 2 or more products and the youngest age and first tried was equal for 2 or more of the products, go to First Tobacco Product section

Else, skip to Reasons To Use Tobacco section.

## FIRST TOBACCO PRODUCT SECTION

**PATH ID: YY0601**

You mentioned that you started using [FILL WITH ALL PRODUCTS USED AT EARLIEST AGE] at age [EARLIEST AGE]. Which type of tobacco did you try first?

- 1 cigarettes
- 2 e-cigarettes
- 3 traditional cigars
- 4 cigarillos
- 5 filtered cigars
- 6 pipe tobacco
- 7 hookah
- 8 smokeless tobacco
- 9 snus pouches
- 10 dissolvable tobacco
- 11 bidis
- 12 kreteks
- 14 Other SPECIFY: \_\_\_\_\_
- 8 DON'T KNOW
- 7 REFUSED

ASK: Respondents who use 2 or more products and the youngest age and first tried was equal for 2 or more of the products

PROGRAM: Make response options a dynamic list with fills based on the products in positively answered questions. Always include the unspecified other.

If OS field selected and additional OS screen is shown, display question text and add the following text: "Please type your answer using the computer keyboard."

## Final Youth Baseline Questionnaire - English

### REASONS TO USE TOBACCO SECTION

PROGRAM: Create new variables:

**EVER\_USE\_TOB** - respondents who have ever used any tobacco products in lifetime.

EVER\_USE\_TOB=1 Yes if (YC1002=1) OR (YE1002=1) OR (YG1002=1) OR (YP1002=1) OR (YH1002=1) OR (YS1002[1 or 2]=1) OR (YD1002=1) OR (YB9102[1 or 2]=1).

Else EVER\_USE\_TOB=2 No.

**EVER\_USE\_CIGS** - respondents who have only ever used cigarettes in lifetime.

EVER\_USE\_CIGS=1 Yes if (YC1002=1) AND (YE1002 NE 1) AND (YG1002 NE 1) AND (YP1002 NE 1) AND (YH1002 NE 1) AND (YS1002 NOT IN [1 and 2] OR YS1001 NE 1) AND (YD1002 NE 1) AND (YB9102 NOT IN [1 and 2] OR YB9101 NOT IN [1 and 2]).

Else EVER\_USE\_CIGS=2 No.

**EVER\_USE\_DUAL** - respondents who have ever used cigarettes and at least one other tobacco product in lifetime.

EVER\_USE\_DUAL=1 Yes if (YC1002 = 1) AND ((YE1002=1) OR (YG1002=1) OR (YP1002=1) OR (YH1002=1) OR (YS1002[1 or 2]=1) OR (YD1002=1) OR (YB9102[1 or 2]=1)).

Else EVER\_USE\_DUAL=2 No.

**EVER\_USE\_TOBXCIGS** - respondents who have ever used any tobacco products, excluding cigarettes, in lifetime.

EVER\_USE\_TOBXCIGS=1 Yes if (YC1002 NE 1) AND ((YE1002=1) OR (YG1002=1) OR (YP1002=1) OR (YH1002=1) OR (YS1002[1 or 2]=1) OR (YD1002=1) OR (YB9102[1 or 2]=1)).

Else EVER\_USE\_TOBXCIGS=2 No.

**PASTYEAR\_TOB\_USE** - respondents who have used any tobacco products in the past year.

PASTYEAR\_TOB\_USE=1 Yes if (YC1112=1, 2, 3, 4 or 5) OR (YE1112=1, 2, 3, 4 or 5) OR (YG1112=1, 2, 3, 4 or 5) OR (YP1112=1, 2, 3, 4 or 5) OR (YH1112=1, 2, 3, 4 or 5) OR (YS1112=1, 2, 3, 4 or 5) OR (YD1112=1, 2, 3, 4 or 5) OR (YB1112=1, 2, 3, 4 or 5).

Else, PASTYEAR\_TOB\_USE=2 No.

The next few questions are statements about tobacco. Please tell me whether you agree or disagree with the following statements.

BOX

PROGRAM: Randomize order for items YX0037-YX0044.

## Final Youth Baseline Questionnaire - English

**PATH ID: YX0037**

I think I would enjoy using tobacco.

- 1 Strongly Agree
- 2 Agree
- 3 Disagree
- 4 Strongly Disagree
- 8 DON'T KNOW
- 7 REFUSED

ASK: All respondents

**PATH ID: YX0040**

I think using tobacco would be energizing.

- 1 Strongly Agree
- 2 Agree
- 3 Disagree
- 4 Strongly Disagree
- 8 DON'T KNOW
- 7 REFUSED

ASK: All respondents

**PATH ID: YX0041**

I think using tobacco would help me reduce or handle stress.

- 1 Strongly Agree
- 2 Agree
- 3 Disagree
- 4 Strongly Disagree
- 8 DON'T KNOW
- 7 REFUSED

ASK: All respondents

**PATH ID: YX0042**

I think using tobacco would help me calm down when I am angry.

- 1 Strongly Agree
- 2 Agree
- 3 Disagree
- 4 Strongly Disagree
- 8 DON'T KNOW
- 7 REFUSED

ASK: All respondents

## Final Youth Baseline Questionnaire - English

**PATH ID: YX0043**

I think using tobacco would help me control my weight.

- 1 Strongly Agree
- 2 Agree
- 3 Disagree
- 4 Strongly Disagree
- 8 DON'T KNOW
- 7 REFUSED

ASK: All respondents

**PATH ID: YX0044**

I think using tobacco would help me to feel more comfortable at parties.

- 1 Strongly Agree
- 2 Agree
- 3 Disagree
- 4 Strongly Disagree
- 8 DON'T KNOW
- 7 REFUSED

ASK: All respondents

**PATH ID: YC1175**

How much do you think people harm themselves when they smoke cigarettes every day?

- 1 No harm
- 2 Little harm
- 3 Some harm
- 4 A lot of harm
- 8 DON'T KNOW
- 7 REFUSED

ASK: All respondents

**PATH ID: YC1170**

How much do you think people harm themselves when they smoke cigarettes some days but not every day?

- 1 No harm
- 2 Little harm
- 3 Some harm
- 4 A lot of harm
- 8 DON'T KNOW
- 7 REFUSED

ASK: All respondents



## Final Youth Baseline Questionnaire - English

**PATH ID: YC1180**

How long do you think someone has to smoke cigarettes before it harms their health?

- 1 It will never harm their health
- 2 Less than a year
- 3 1 year
- 4 5 years
- 5 10 years
- 6 20 years or more
- 8 DON'T KNOW
- 7 REFUSED

ASK: All respondents

**PATH ID: YS1175**

How much do you think people harm themselves when they use smokeless tobacco, such as chewing tobacco, snuff, dip, or snus, every day?

- 1 No harm
- 2 Little harm
- 3 Some harm
- 4 A lot of harm
- 8 DON'T KNOW
- 7 REFUSED

ASK: All respondents

**PATH ID: YS1170**

How much do you think people harm themselves when they use smokeless tobacco, such as chewing tobacco, snuff, dip, or snus, some days but not every day?

- 1 No harm
- 2 Little harm
- 3 Some harm
- 4 A lot of harm
- 8 DON'T KNOW
- 7 REFUSED

ASK: All respondents

## Final Youth Baseline Questionnaire - English

**PATH ID: YX0625**

How long do you think someone has to use smokeless tobacco such as chewing tobacco, snuff, dip, or snus before it harms their health?

- 1 It will never harm their health
- 2 Less than a year
- 3 1 year
- 4 5 years
- 5 10 years
- 6 20 years or more
- 8 DON'T KNOW
- 7 REFUSED

ASK: All respondents

**PATH ID: YE1180**

How long do you think someone has to use e-cigarettes before it harms their health?

- 1 It will never harm their health
- 2 Less than a year
- 3 1 year
- 4 5 years
- 5 10 years
- 6 20 years or more
- 8 DON'T KNOW
- 7 REFUSED

ASK: All respondents

**PATH ID: YD1180**

How long do you think someone has to use dissolvable tobacco before it harms their health?

- 1 It will never harm their health
- 2 Less than a year
- 3 1 year
- 4 5 years
- 5 10 years
- 6 20 years or more
- 8 DON'T KNOW
- 7 REFUSED

ASK: All respondents

## Final Youth Baseline Questionnaire - English

**PATH ID: YX0620**

How long do you think someone has to use other kinds of smoked tobacco, like cigars, cigarillos, filtered cigars, pipes, hookah, bidis, or kreteks before it harms their health?

- 1 It will never harm their health
- 2 Less than a year
- 3 1 year
- 4 5 years
- 5 10 years
- 6 20 years or more
- 8 DON'T KNOW
- 7 REFUSED

ASK: All respondents

**BOX AY1**

PROGRAM:

CREATE AN ARRAY USEPROD WITH 11 ELEMENTS - ONE FOR EACH TOBACCO TYPE - THAT IDENTIFIES WHETHER THE RESPONDENT IS A CURRENT OR SOME DAY USER OF THE SPECIFIC TOBACCO TYPE.

USEPROD(1-11): Past 30 day users of: (1) e-cigarettes; (2) traditional cigars; (3) cigarillos; (4) filtered cigars; (5) pipes; (6) hookahs; (7) snus; (8) dissolvable tobacco; (9) bidis; (10) kreteks; (11) smokeless tobacco.

CREATE AN ARRAY HNUPROD WITH 11 ELEMENTS – ONE FOR EACH TOBACCO TYPE (EXCLUDING CIGARETTES) – THAT IDENTIFIES WHETHER THE RESPONDENT HAS HEARD OF BUT NEVER USED THE SPECIFIC TOBACCO TYPE.

HNUPROD(1-11): Heard of but have never used: (1) e-cigarettes; (2) traditional cigars; (3) cigarillos; (4) filtered cigars; (5) pipes; (6) hookahs; (7) snus; (8) dissolvable tobacco; (9) bidis; (10) kreteks; (11) smokeless tobacco.

**PATH ID: YX0300**

How much do you agree or disagree with this statement: I have considered switching completely from using [USEPROD(1-11)] to smoking cigarettes.

- 1 Strongly agree
- 2 Agree
- 3 Neither agree nor disagree
- 4 Disagree
- 5 Strongly disagree
- 8 DON'T KNOW
- 7 REFUSED

ASK: Past 30 days users of [USEPROD(1-11)] who have ever tried smoking cigarettes

PROGRAM: EXCLUDE CIGARETTES from USEPROD list for this question

NOTE: This question will ask about switching from each product the respondent has used to cigarettes.

## Final Youth Baseline Questionnaire - English

**PATH ID: YX0307**

Have you considered switching from [USEPROD(1-11)] to any of the following products? Choose all that apply.

- 1 I have not considered switching to another product
- 2 [FILL RESPONSE OPTIONS WITH HNUPROD(1-11)]
- X
- 8 DON'T KNOW
- 7 REFUSED

ASK: Past 30 day users of [USEPROD(1-11)] Ask the question one time for each product in USEPROD(1-11). Each time the question is asked, fill response options with HNUPROD(1-11).

NOTE: This question will ask about switching from each product the respondent uses to each product they have heard of but never used.

## Final Youth Baseline Questionnaire - English

### NICOTINE DEPENDENCE SECTION

**PATH ID: YN0703**

The next questions ask about your experience with tobacco products.

How soon after you wake up do you want to use tobacco?

- 1 Within 5 minutes
- 2 From 6 to 30 minutes
- 3 From more than 30 minutes to 1 hour
- 4 After more than 1 hour but less than 24 hours
- 5 I rarely want to use tobacco
- 8 DON'T KNOW
- 7 REFUSED

ASK: Respondents who have used any tobacco products in the past year (PASTYEAR\_TOB\_USE=1).

**PATH ID: YN0704**

Do you ever have strong cravings to use tobacco?

- 1 Yes
- 2 No
- 8 DON'T KNOW
- 7 REFUSED

ASK: Respondents who have used a tobacco product in the past year (PASTYEAR\_TOB\_USE=1).

**PATH ID: YN0705**

Have you ever felt like you really needed to use tobacco?

- 1 Yes
- 2 No
- 8 DON'T KNOW
- 7 REFUSED

ASK: Respondents who have used a tobacco product in the past year (PASTYEAR\_TOB\_USE=1).

## Final Youth Baseline Questionnaire - English

**PATH ID: YN0055**

Please rate your level of agreement for each statement using the following scale: 1= not true of me at all to 5=extremely true of me.

I find myself reaching for a tobacco product without thinking about it.

- 1 Not true of me at all
- 2
- 3
- 4
- 5 Extremely true of me
- 8 DON'T KNOW
- 7 REFUSED

ASK: Respondents who have used any tobacco in the past year (PASTYEAR\_TOB\_USE=1).

BOX: PROGRAM: Randomize order of items YN0025-YN0080.

**PATH ID: YN0025**

I frequently crave tobacco.

- 1 Not true of me at all
- 2
- 3
- 4
- 5 Extremely true of me
- 8 DON'T KNOW
- 7 REFUSED

ASK: Respondents who have used a tobacco product in the past year (PASTYEAR\_TOB\_USE=1).

**PATH ID: YN0045**

My tobacco use is out of control.

- 1 Not true of me at all
- 2
- 3
- 4
- 5 Extremely true of me
- 8 DON'T KNOW
- 7 REFUSED

ASK: Respondents who have used any tobacco product in the past year (PASTYEAR\_TOB\_USE=1).

## Final Youth Baseline Questionnaire - English

**PATH ID: YN0070**

Using tobacco really helps me feel better if I've been feeling down.

- 1 Not true of me at all
- 2
- 3
- 4
- 5 Extremely true of me
- 8 DON'T KNOW
- 7 REFUSED

ASK: Respondents who have used any tobacco in the past year (PASTYEAR\_TOB\_USE=1).

**PATH ID: YN0075**

Using tobacco helps me think better.

- 1 Not true of me at all
- 2
- 3
- 4
- 5 Extremely true of me
- 8 DON'T KNOW
- 7 REFUSED

ASK: Respondents who have used any tobacco in the past year (PASTYEAR\_TOB\_USE=1).

**PATH ID: YN0255**

Most of the people I spend time with are tobacco users.

- 1 Not true of me at all
- 2
- 3
- 4
- 5 Extremely true of me
- 8 DON'T KNOW
- 7 REFUSED

ASK: Respondents who have used any tobacco in the past year (PASTYEAR\_TOB\_USE=1).

## Final Youth Baseline Questionnaire - English

**PATH ID: YN0080**

I would feel alone without my tobacco.

- 1 Not true of me at all
- 2
- 3
- 4
- 5 Extremely true of me
- 8 DON'T KNOW
- 7 REFUSED

ASK: Respondents who have used any tobacco in the past year (PASTYEAR\_TOB\_USE=1).

**PATH ID: YN0060**

I usually want to use tobacco right after I wake up.

- 1 Not true of me at all
- 2
- 3
- 4
- 5 Extremely true of me
- 8 DON'T KNOW
- 7 REFUSED

ASK: Respondents who have used any tobacco in the past year and did not report that they rarely want to use tobacco after waking up (PASTYEAR\_TOB\_USE=1) AND (YN0703 NE 5).



## Final Youth Baseline Questionnaire - English

### CESSATION / QUITTER SECTION

**PATH ID: YC1210**

Do you want to completely stop smoking cigarettes?

- 1 Yes
- 2 No
- 8 DON'T KNOW
- 7 REFUSED

ASK: Respondents who have smoked a cigarette in the past 30 days (PAST30DAY\_NL\_CIGS = 1)

**PATH ID: YC1215**

Have you tried to completely stop smoking cigarettes within the past 12 months?

- 1 Yes
- 2 No GO TO YC1230
- 8 DON'T KNOW GO TO YC1230
- 7 REFUSED GO TO YC1230

ASK: Respondents who have smoked a cigarette in the past 30 days (PAST30DAY\_NL\_CIGS = 1)

**PATH ID: YC1220**

In the past 12 months, how many times have you stopped smoking for one day or longer because you were trying to quit smoking cigarettes for good?

- 1 |\_|\_|
- 8 DON'T KNOW
- 7 REFUSED

ASK: Respondents who have smoked a cigarette in the past 30 days (PAST30DAY\_NL\_CIGS = 1) who have tried to quit smoking in the past year (YC1215 = 1).

**PATH ID: YC1225**

When you last tried to quit for good, how long did you stay off cigarettes? Please choose the first answer that fits.

- 1 Less than 1 day
- 2 1 to 7 days
- 3 More than 7 days but less than 30 days
- 4 More than 30 days but less than 6 months
- 5 More than 6 months but less than 1 year
- 6 1 year or more
- 8 DON'T KNOW
- 7 REFUSED

ASK: Respondents who have smoked a cigarette in the past 30 days (PAST30DAY\_NL\_CIGS = 1) who have tried to quit smoking in the past year (YC1215 = 1).

## Final Youth Baseline Questionnaire - English

**PATH ID: YC1230**

If you decided to quit cigarettes for good, how likely is it that you would succeed?

- 1 Very likely
- 2 Somewhat likely
- 3 Somewhat unlikely
- 4 Very unlikely
- 8 DON'T KNOW
- 7 REFUSED

ASK: Respondents who have smoked a cigarette in the past 30 days (PAST30DAY\_NL\_CIGS = 1)

**PATH ID: YN0126**

Have you tried to completely stop use of all tobacco products within the past 12 months?

- 1 Yes
- 2 No GO TO YN0127
- 8 DON'T KNOW GO TO YN0127
- 7 REFUSED GO TO YN0127

ASK: Respondents who have used any tobacco product in the past 30 days except cigarette only [(PAST30DAY\_NL\_ECIGS = 1) OR (PAST30DAY\_NL\_[CIGARFILL] = 1) OR (PAST30DAY\_NL\_PIPE = 1) OR (YH1112=1, 2 or 3) OR (PAST30DAY\_NL\_[SMKLSSFILL] = 1) OR (PAST30DAY\_NL\_DISS = 1) OR (PAST30DAY\_NL\_[BKFILL] = 1)]

**PATH ID: YN0120**

In the past 12 months, have you stopped using all tobacco products for one day or longer because you were trying to quit for good?

- 1 Yes
- 2 No
- 8 DON'T KNOW
- 7 REFUSED

ASK: Respondents who have tried to quit using all tobacco products in the past year (YN0126 = 1).

## Final Youth Baseline Questionnaire - English

**PATH ID: YN0127**

Are you seriously thinking about quitting [cigarettes | all tobacco products | cigarettes and tobacco products]?

- 1 Yes, within the next 30 days
- 2 Yes, within the next 6 months
- 3 Yes, within the year
- 4 Yes, but not within the year
- 5 No, I am not seriously thinking about quitting
- 8 DON'T KNOW
- 7 REFUSED

ASK: Respondents who have used any tobacco product in the past 30 days including cigarette smokers (only and not-only) [(PAST30DAY\_NL\_CIGS = 1) OR (PAST30DAY\_NL\_ECIGS = 1) OR (PAST30DAY\_NL\_[CIGARFILL] = 1) OR (PAST30DAY\_NL\_PIPE = 1) OR (YH1112=1, 2 or 3) OR (PAST30DAY\_NL\_[SMKLSSFILL] = 1) OR (PAST30DAY\_NL\_DISS = 1) OR (PAST30DAY\_NL\_[BKFILL] = 1)]

If cigarette smoker only [(PAST30DAY\_NL\_CIGS = 1) AND [(PAST30DAY\_ECIGS = 2) AND (PAST30DAY\_[CIGARFILL] = 2) AND (PAST30DAY\_PIPE = 2) AND (YH1112 NE 1, 2 or 3) AND (PAST30DAY\_[SMKLSSFILL] = 2) AND (PAST30DAY\_DISS = 2) AND (PAST30DAY\_[BKFILL] = 2)], display "cigarettes".

If non-cigarette tobacco user [(PAST30DAY\_CIGS = 2) AND [(PAST30DAY\_NL\_ECIGS = 1) OR (PAST30DAY\_NL\_[CIGARFILL] = 1) OR (PAST30DAY\_NL\_PIPE = 1) OR (YH1112=1, 2 or 3) OR (PAST30DAY\_NL\_[SMKLSSFILL] = 1) OR (PAST30DAY\_NL\_DISS = 1) OR (PAST30DAY\_NL\_[BKFILL] = 1)], display " all tobacco products".

If cigarette and other tobacco user [(PAST30DAY\_NL\_CIGS = 1) AND (PAST30DAY\_NL\_ECIGS = 1) OR (PAST30DAY\_NL\_[CIGARFILL] = 1) OR (PAST30DAY\_NL\_PIPE = 1) OR (YH1112=1, 2 or 3) OR (PAST30DAY\_NL\_[SMKLSSFILL] = 1) OR (PAST30DAY\_NL\_DISS = 1) OR (PAST30DAY\_NL\_[BKFILL] = 1)], display "cigarettes and tobacco products".

## Final Youth Baseline Questionnaire - English

### SECONDHAND SMOKE SECTION

DISPLAY TRANSITION TEXT: The next questions ask about the rules of using tobacco inside your home.

**PATH ID: YX0671**

Does anyone who lives with you now do any of the following? Choose all that apply.

- 1 Smoke cigarettes
- 2 Use smokeless tobacco, such as chewing tobacco, snuff, dip, or snus
- 3 Smoke cigars, cigarillos, or filtered cigars
- 4 Use any other form of tobacco
- 5 No one who lives with me now uses any form of tobacco
- 8 DON'T KNOW
- 7 REFUSED

ASK: All respondents

PROGRAM: Option 5 may not be selected if Options 1, 2, 3 or 4 are selected.

**PATH ID: YR1045**

Please think about everyone who might be in your home including children, adults, visitors, guests, or workers.

For tobacco products that are burned, such as cigarettes, cigars, pipes or hookah, which statement best describes the rules about smoking a tobacco product inside your home?

- 1 It is not allowed anywhere or at any time inside my home
- 2 It is allowed in some places or at some times inside my home
- 3 It is allowed anywhere and at any time inside my home
- 8 DON'T KNOW
- 7 REFUSED

ASK: All respondents

**PATH ID: YR1050**

Now think about other tobacco products that are not burned, like smokeless tobacco, dissolvable tobacco, and electronic cigarettes. Which statement best describes the rules about using these products inside your home?

- 1 It is not allowed anywhere or at any time inside my home
- 2 It is allowed in some places or at some times inside my home
- 3 It is allowed anywhere and at any time inside my home
- 8 DON'T KNOW
- 7 REFUSED

ASK: All respondents

## Final Youth Baseline Questionnaire - English

**PATH ID: YX0068**

During the past seven days, about how many hours were you around others who were smoking[, whether or not you were smoking yourself]? Include time in your home, in a car, at school, or outdoors.

- 1 | |\_|\_|\_|
- 8 DON'T KNOW
- 7 REFUSED

ASK: All respondents

PROGRAM: If respondent has smoked cigarettes, cigars, pipe or hookah in the past 30 days, display ' , whether or not you were smoking yourself'

Final Youth Baseline Questionnaire - English

**MODIFIED RISK TOBACCO PRODUCTS SECTION**

**PATH ID: YX0667**

To what extent do you agree or disagree with the following statement?

Some tobacco products are safer than others.

- 1 Strongly agree
- 2 Agree
- 3 Neither agree or disagree
- 4 Disagree
- 5 Strongly disagree
- 8 DON'T KNOW
- 7 REFUSED

ASK: All respondents

**PATH ID: YX0669**

In the past 12 months, have you seen any tobacco products that claim to be safer than other tobacco products?

- 1 Yes
- 2 No GO TO YR0141
- 8 DON'T KNOW GO TO YR0141
- 7 REFUSED GO TO YR0141

ASK: All respondents

**PATH ID: YX0670**

How likely is it that you will use one of these tobacco products that claim to be safer in the next 30 days?

- 1 Very likely
- 2 Somewhat likely
- 3 Somewhat unlikely
- 4 Very unlikely
- 8 DON'T KNOW
- 7 REFUSED

ASK: Respondents who have seen any tobacco products that claim to be safer than other tobacco products in the past year (YX0669 = 1).

Final Youth Baseline Questionnaire - English

**PACKAGING AND HEALTH WARNINGS SECTION**

**PATH ID: YR0141**

In the past 12 months, how often have you seen a list of the chemicals contained in tobacco products?

|    |            |
|----|------------|
| 1  | Never      |
| 2  | Rarely     |
| 3  | Sometimes  |
| 4  | Often      |
| 5  | Very often |
| -8 | DON'T KNOW |
| -7 | REFUSED    |

ASK: All respondents

**PATH ID: YR0142**

In the past 12 months, how often have you thought about the chemicals contained in tobacco products?

|    |            |
|----|------------|
| 1  | Never      |
| 2  | Rarely     |
| 3  | Sometimes  |
| 4  | Often      |
| 5  | Very often |
| -8 | DON'T KNOW |
| -7 | REFUSED    |

ASK: All respondents

**PATH ID: YR0005**

In the past 30 days, how often, if at all, have you noticed the health warnings on cigarette packages?

|    |            |              |
|----|------------|--------------|
| 1  | Never      | GO TO YR0060 |
| 2  | Rarely     |              |
| 3  | Sometimes  |              |
| 4  | Often      |              |
| 5  | Very often |              |
| -8 | DON'T KNOW | GO TO YR0060 |
| -7 | REFUSED    | GO TO YR0060 |

ASK: All respondents

GO TO: If YC1002 = 2 AND YR0005>1, GO TO YR0055.

## Final Youth Baseline Questionnaire - English

**PATH ID: YR0202**

In the past 30 days, how often, if at all, have you read or looked closely at the health warnings on cigarette packages?

- 1 Never
- 2 Rarely
- 3 Sometimes
- 4 Often
- 5 Very often
- 8 DON'T KNOW
- 7 REFUSED

ASK: Ever smokers who have noticed the health warnings in the past month (YC1002=1 AND YR0005>1).

**PATH ID: YR0010**

In the past 30 days, how often, if at all, have the health warnings stopped you from having a cigarette when you were about to smoke one?

- 1 Never
- 2 Rarely
- 3 Sometimes
- 4 Often
- 5 Very often
- 8 DON'T KNOW
- 7 REFUSED

ASK: Ever smokers who have noticed the health warnings in the past month (YC1002=1 AND YR0005>1).

**PATH ID: YR0015**

In the past 30 days, have you tried to avoid looking at or thinking about the health warnings on cigarette packs - such as covering them up, keeping them out of sight, using a cigarette case, avoiding certain warnings, or any other means?

- 1 Yes
- 2 No
- 8 DON'T KNOW
- 7 REFUSED

ASK: Ever smokers who have noticed the health warnings in the past month (YC1002=1 AND YR0005>1).



## Final Youth Baseline Questionnaire - English

**PATH ID: YR0025**

How believable do you consider the health warnings on cigarette packs to be?

- 1 Not at all believable
- 2 A little believable
- 3 Somewhat believable
- 4 Very believable
- 5 Extremely believable
- 8 DON'T KNOW
- 7 REFUSED

ASK: Ever smokers who have noticed the health warnings in the past month (YC1002=1 AND YR0005>1).

**PATH ID: YR0030**

How do the health warnings on cigarette packs make you feel about smoking?

- 1 Very unconcerned
- 2 Somewhat unconcerned
- 3 Neither concerned nor unconcerned
- 4 Somewhat concerned
- 5 Very concerned
- 8 DON'T KNOW
- 7 REFUSED

ASK: Ever smokers who have noticed the health warnings in the past month (YC1002=1 AND YR0005>1).

**PATH ID: YR0035**

To what extent, if at all, do the health warnings on cigarette packs make you think about the health risks of smoking?

- 1 Not at all
- 2 A little
- 3 Somewhat
- 4 A lot
- 8 DON'T KNOW
- 7 REFUSED

ASK: Ever smokers who have noticed the health warnings in the past month (YC1002=1 AND YR0005>1).

## Final Youth Baseline Questionnaire - English

**PATH ID: YR0203**

To what extent, if at all, do the health warnings on cigarette packs make you never want to smoke again?

- 1 Not at all
- 2 A little
- 3 Somewhat
- 4 A lot
- 8 DON'T KNOW
- 7 REFUSED

ASK: Ever smokers who have noticed the health warnings in the past month (YC1002=1 AND YR0005>1).

GO TO: If YC1002=2 AND YR0005>1, GO TO YR0055.

Else GO TO YR0060.

**PATH ID: YR0055**

To what extent, if at all, have the health warnings on cigarette packs made you less likely to start smoking?

- 1 Not at all
- 2 A little
- 3 Somewhat
- 4 A lot
- 8 DON'T KNOW
- 7 REFUSED

ASK: Respondents that have never tried smoking who have seen the health warnings (YC1002 = 2 AND YR0005>1).

**PATH ID: YR0060**

In the past 30 days, how often, if at all, have you noticed the health warnings on packages of smokeless tobacco products like snus, moist snuff, dip, spit and chew?

- 1 Never GO TO YR0110
- 2 Rarely
- 3 Sometimes
- 4 Often
- 5 Very often
- 8 DON'T KNOW GO TO YR0110
- 7 REFUSED GO TO YR0110

ASK: Respondents who have heard of smokeless tobacco (YS1001=1)

GO TO: If ((YS1002(1)=1 OR YS1002(2)=1)) AND (YR0060 >1), GO TO YR0205

If YS1002(3)=1 AND YR0060>1, GO TO YR0220

Else GO TO YR0110.

## Final Youth Baseline Questionnaire - English

**PATH ID: YR0205**

In the past 30 days, how often, if at all, have you read or looked closely at the health warnings on smokeless tobacco packages?

- 1 Never
- 2 Rarely
- 3 Sometimes
- 4 Often
- 5 Very often
- 8 DON'T KNOW
- 7 REFUSED

ASK: Ever users who have noticed the health warnings in the past month ((YS1002(1)=1 OR YS1002(2)=1)) AND (YR0060 >1)

**PATH ID: YR0065**

In the past 30 days, how often, if at all, have the health warnings stopped you from having a smokeless tobacco product when you were about to use one?

- 1 Never
- 2 Rarely
- 3 Sometimes
- 4 Often
- 5 Very often
- 8 DON'T KNOW
- 7 REFUSED

ASK: Ever users who have noticed the health warnings in the past month ((YS1002(1)=1 OR YS1002(2)=1)) AND (YR0060 >1).

**PATH ID: YR0070**

In the past 30 days, have you tried to avoid looking at or thinking about the health warnings on packages of smokeless tobacco products - such as covering them up, keeping them out of sight, avoiding certain warnings, or any other means?

- 1 Yes
- 2 No
- 8 DON'T KNOW
- 7 REFUSED

ASK: Ever users who have noticed the health warnings in the past month ((YS1002(1)=1 OR YS1002(2)=1)) AND (YR0060 >1).

## Final Youth Baseline Questionnaire - English

**PATH ID: YR0075**

How believable do you consider the health warnings on packages of smokeless tobacco products to be?

- 1 Not at all believable
- 2 A little believable
- 3 Somewhat believable
- 4 Very believable
- 5 Extremely believable
- 8 DON'T KNOW
- 7 REFUSED

ASK: Ever users who have noticed the health warnings in the past month ((YS1002(1)=1 OR YS1002(2)=1)) AND (YR0060 >1).

**PATH ID: YR0080**

How do the health warnings on packages of smokeless tobacco products make you feel about using it?

- 1 Very unconcerned
- 2 Somewhat unconcerned
- 3 Neither concerned nor unconcerned
- 4 Somewhat concerned
- 5 Very concerned
- 8 DON'T KNOW
- 7 REFUSED

ASK: Ever users who have noticed the health warnings in the past month ((YS1002(1)=1 OR YS1002(2)=1)) AND (YR0060 >1).

**PATH ID: YR0085**

To what extent, if at all, do the health warnings on packages of smokeless tobacco products make you think about the health risks of using smokeless tobacco products?

- 1 Not at all
- 2 A little
- 3 Somewhat
- 4 A lot
- 8 DON'T KNOW
- 7 REFUSED

ASK: Ever users who have noticed the health warnings in the past month ((YS1002(1)=1 OR YS1002(2)=1)) AND (YR0060 >1).

## Final Youth Baseline Questionnaire - English

**PATH ID: YR0218**

To what extent, if at all, do the health warnings on packages of smokeless tobacco products make you never want to use smokeless tobacco again?

- 1 Not at all
- 2 A little
- 3 Somewhat
- 4 A lot
- 8 DON'T KNOW
- 7 REFUSED

ASK: Ever users who have noticed the health warnings in the past month ((YS1002(1)=1 OR YS1002(2)=1)) AND (YR0060 >1).

GO TO: If YS1002(3)=1 AND YR0060 >1, GO TO YR0220

Else GO TO YR0110.

**PATH ID: YR0220**

To what extent, if at all, have the health warnings on smokeless tobacco packages made you less likely to start using smokeless tobacco?

- 1 Not at all
- 2 A little
- 3 Somewhat
- 4 A lot
- 8 DON'T KNOW
- 7 REFUSED

ASK: Respondents who have never tried smokeless tobacco who have seen the health warnings (YS1002(3) = 1 AND YR0060 > 1).

**PATH ID: YR0110**

In the past 30 days, how often, if at all, have you noticed the health warnings on packages of e-cigarettes?

- 1 Never
- 2 Rarely
- 3 Sometimes
- 4 Often
- 5 Very often
- 8 DON'T KNOW
- 7 REFUSED

ASK: Respondents who have used e-cigarettes in the past 30 days (PAST30DAY\_ECIGS = 1).

## Final Youth Baseline Questionnaire - English

**PATH ID: YR0225**

In the past 30 days, how often, if at all, have you noticed the health warnings on packages of cigars, cigarillos, or filtered cigars?

- 1 Never
- 2 Rarely
- 3 Sometimes
- 4 Often
- 5 Very often
- 8 DON'T KNOW
- 7 REFUSED

ASK: Respondents who have smoked a cigar, filtered cigar, or cigarillo in the past 30 days (PAST30DAY\_[CIGARFILL] = 1).

**PATH ID: YR0130**

In the past 30 days, how often, if at all, have you noticed the health warnings on packages of pipe tobacco?

- 1 Never
- 2 Rarely
- 3 Sometimes
- 4 Often
- 5 Very often
- 8 DON'T KNOW
- 7 REFUSED

ASK: Respondents who have smoked a pipe in the past 30 days (PAST30DAY\_PIPE = 1).

**PATH ID: YR0135**

In the past 30 days, how often, if at all, have you noticed the health warnings on packages of shisha tobacco?

- 1 Never
- 2 Rarely
- 3 Sometimes
- 4 Often
- 5 Very often
- 8 DON'T KNOW
- 7 REFUSED

ASK: Respondents who have smoked hookah in the past 30 days (YH9004 > 0 or YH1112 = 1, 2 or 3).

## Final Youth Baseline Questionnaire - English

**PATH ID: YR0140**

In the past 30 days, how often, if at all, have you noticed the health warnings on packages of dissolvable tobacco?

- 1 Never
- 2 Rarely
- 3 Sometimes
- 4 Often
- 5 Very often
- 8 DON'T KNOW
- 7 REFUSED

ASK: Respondents who have used a dissolvable tobacco product in the past 30 days (PAST30DAY\_DISS = 1).

**PATH ID: YR0230**

In the past 30 days, how often, if at all, have you noticed the health warnings on packages of bidis or kreteks?

- 1 Never
- 2 Rarely
- 3 Sometimes
- 4 Often
- 5 Very often
- 8 DON'T KNOW
- 7 REFUSED

ASK: Respondents who have smoked a bidi or kretek in the past 30 days (PAST30DAY\_[BKFILL] = 1).

Final Youth Baseline Questionnaire - English

**MARKETING SECTION**

**PATH ID: YX0475**

In the past 6 months, have you seen a tobacco sweepstakes ad?

- 1 Yes
- 2 No
- 8 DON'T KNOW
- 7 REFUSED

ASK: All respondents

PROGRAM: DISPLAY SWEEPSTAKES/GIVEAWAY IMAGE. THE PICTURE SHOWS A COMPOSITE IMAGE OF SEVERAL TOBACCO SPONSORED SWEEPSTAKES

**PATH ID: YX0476**

In the past 6 months, have you participated in a tobacco sponsored sweepstakes?

- 1 Yes
- 2 No
- 8 DON'T KNOW
- 7 REFUSED

ASK: All respondents

**PATH ID: YX0477**

In the past 6 months, have you gotten a discount coupon for any tobacco product?

- 1 Yes
- 2 No GO TO YX0526
- 8 DON'T KNOW GO TO YX0526
- 7 REFUSED GO TO YX0526

ASK: All respondents

PROGRAM: DISPLAY COUPON IMAGE. THE PICTURE SHOWS A COMPOSITE IMAGE OF SEVERAL DISCOUNT COUPONS



## Final Youth Baseline Questionnaire - English

**PATH ID: YX0478**

Where did you get discount coupons from? Choose all that apply.

- 1 The mail
- 2 E-mail
- 3 The Internet
- 4 Social Networks (such as Facebook and Twitter)
- 5 A text message
- 6 On a cigarette pack or other tobacco product
- 7 From a friend or other person
- 8 Some other way: SPECIFY \_\_\_\_\_
- 8 DON'T KNOW
- 7 REFUSED

ASK: Respondents who have received a discount coupon (YX0477 = 1).

PROGRAM: If OS field selected and additional OS screen is shown, display question text and add the following text: "Please type your answer using the computer keyboard."

**PATH ID: YX0479**

In the past 6 months, have you used a discount coupon to purchase a tobacco product?

- 1 Yes
- 2 No
- 8 DON'T KNOW
- 7 REFUSED

ASK: Respondents who have obtained a discount coupon (YX0477 = 1).

**PATH ID: YX0526**

In the past 6 months, did a tobacco company send you any information other than coupons?

- 1 Yes
- 2 No GO TO YX0481
- 8 DON'T KNOW GO TO YX0481
- 7 REFUSED GO TO YX0481

ASK: All respondents

## Final Youth Baseline Questionnaire - English

**PATH ID: YX0480**

How did a tobacco company send you any information other than coupons? Choose all that apply.

- 1 The mail
- 2 E-mail
- 3 The Internet
- 4 Social Networks (such as Facebook and Twitter)
- 5 A text message
- 6 Some other way: SPECIFY \_\_\_\_\_
- 8 DON'T KNOW
- 7 REFUSED

ASK: Respondents who have received information (YX0526 = 1).

PROGRAM: If OS field selected and additional OS screen is shown, display question text and add the following text: "Please type your answer using the computer keyboard."

**PATH ID: YX0481**

In the past 6 months, have you gotten a free sample of a tobacco product?

- 1 Yes
- 2 No
- 8 DON'T KNOW
- 7 REFUSED

ASK: All respondents

**ACCESSIBILITY SECTION**

**PATH ID: YX0499**

How easy do you think it is for people your age to buy tobacco products in a store?

- 1 Very easy
- 2 Somewhat easy
- 3 Somewhat difficult
- 4 Very difficult
- 8 DON'T KNOW
- 7 REFUSED

ASK: All respondents

## Final Youth Baseline Questionnaire - English

### MEDIA USE SECTION

**PATH ID: YX0494**

The next questions ask about your TV, internet and cell phone use.

About how long do you spend watching TV on a typical day?

- 1 None
- 2 Less than 1 hour
- 3 1 to 2 hours
- 4 3 to 4 hours
- 5 More than 4 hours
- 8 DON'T KNOW
- 7 REFUSED

ASK: All respondents

**PATH ID: YX0486**

Overall, how often do you use the internet?

- 1 Several times a day
- 2 About once a day
- 3 3-5 days a week
- 4 1-2 days a week
- 5 Every few weeks
- 6 Less often
- 7 Don't have regular internet access GO TO YX0498
- 8 DON'T KNOW GO TO YX0498
- 7 REFUSED GO TO YX0498

ASK: All respondents

**PATH ID: YX0062**

Do you have a Facebook, Google Plus, MySpace, Twitter, or other social networking account?

- 1 Yes
- 2 No GO TO YX0487
- 8 DON'T KNOW GO TO YX0487
- 7 REFUSED GO TO YX0487

ASK: Respondents who have access to the internet (YX0486 NE 7, -8 or -7)

## Final Youth Baseline Questionnaire - English

**PATH ID: YX0063**

How often do you visit your Facebook, Google Plus, MySpace, Twitter, or other social networking account?

- 1 Several times a day
- 2 Daily
- 3 Weekly
- 4 Monthly or less
- 8 DON'T KNOW
- 7 REFUSED

ASK: Respondents who have a Facebook or other social networking account (YX0062 = 1).

**PATH ID: YX0490**

Has anyone discussed tobacco products on your Facebook, Google Plus, MySpace, Twitter, or other social networking account?

- 1 Yes
- 2 No
- 8 DON'T KNOW
- 7 REFUSED

ASK: Respondents who have a Facebook or other social networking account (YX0062 = 1).

**PATH ID: YX0487**

In the past 6 months, have you ever signed up for email alerts about tobacco products, read articles online about tobacco products, or watched a video online about tobacco products?

- 1 Yes
- 2 No
- 8 DON'T KNOW
- 7 REFUSED

ASK: Respondents who have access to the internet (YX0486 NE 7, -8 or -7)

**PATH ID: YX0483**

This is the website for [BRAND].

In the past 6 months, have you been to this website?

- 1 Yes
- 2 No GO TO YX0485
- 8 DON'T KNOW GO TO YX0485
- 7 REFUSED GO TO YX0485

ASK: Internet users (YX0486 NE 7, -8 or -7).

PROGRAM: For questions YX0483 to YX0492, loop through screenshots of 5 tobacco websites. Fill [BRAND] with the brand name the website represents.

## Final Youth Baseline Questionnaire - English

**PATH ID: YX0484**

Did you register at the [BRAND] website?

- 1 Yes
- 2 No
- 8 DON'T KNOW
- 7 REFUSED

ASK: Internet users (YX0486 NE 7, -8 or -7) who have ever visited this website (YX0483 = 1).

**PATH ID: YX0485**

How much do you like this website?

- 1 I strongly like this website
- 2 I like this website
- 3 I don't like or dislike this website
- 4 I dislike this website
- 5 I strongly dislike this website
- 8 DON'T KNOW
- 7 REFUSED

ASK: Internet users (YX0486 NE 7, -8 or -7).

Note: This question asked even if the respondent reports that they have never been to the website.

**PATH ID: YX0491**

Have you liked or followed [BRAND] on Facebook, Twitter or other sites?

- 1 Yes
- 2 No
- 8 DON'T KNOW
- 7 REFUSED

ASK: Respondents who have a social networking account (YX0062 = 1).

PROGRAM: Fill in [BRAND] from YX0483.

Note: This question asked even if the respondent reports that they have never been to the website.

**PATH ID: YX0493**

Have you sent a link or information about [BRAND] to others on Facebook, Twitter or other sites?

- 1 Yes
- 2 No
- 8 DON'T KNOW
- 7 REFUSED

ASK: Respondents who have a social networking account (YX0062 = 1).

PROGRAM: Fill in [BRAND] from YX0483.

Note: This question asked even if the respondent reports that they have never been to the website.

## Final Youth Baseline Questionnaire - English

**PATH ID: YX0492**

Have you played an online game related to [BRAND]?

- 1 Yes
- 2 No
- 8 DON'T KNOW
- 7 REFUSED

ASK: Internet users (YX0486 NE 7, -8 or -7)

PROGRAM: Fill in [BRAND] from YX0483.

Note: This question asked even if the respondent reports that they have never been to the website.

**PATH ID: YX0498**

DISPLAY MOVIE TITLE (DRAWN FROM A POOL OF RECENTLY RELEASED MOVIES). SHOW 5 MOVIE TITLES.

How many times have you seen this movie?

- 1 Never
- 2 Once
- 3 Twice
- 4 3 or more times
- 8 DON'T KNOW
- 7 REFUSED

ASK: All respondents

**PATH ID: YX0495**

Do you regularly use a smart phone?

- 1 Yes
- 2 No GO TO YX0500
- 8 DON'T KNOW GO TO YX0500
- 7 REFUSED GO TO YX0500

ASK: All respondents

**PATH ID: YX0496**

A Quick Response code is a white square with black dots in it, sometimes called a QR code.

[INSERT IMAGE OF QR CODE FOR PATH WEBSITE]

Have you ever used a smart phone to scan a QR code for a tobacco product or to enter a sweepstakes or drawing from a tobacco company?

- 1 Yes
- 2 No GO TO YX0500
- 8 DON'T KNOW GO TO YX0500
- 7 REFUSED GO TO YX0500

ASK: Respondents who regularly use a smart phone (YX0495 = 1).

## Final Youth Baseline Questionnaire - English

**PATH ID: YX0497**

Did this code take you to a tobacco company web site?

- 1 Yes
- 2 No
- 8 DON'T KNOW
- 7 REFUSED

ASK: Respondents who have scanned a QR code (YX0496 = 1).



## Final Youth Baseline Questionnaire - English

### PSYCHOSOCIAL SECTION

**PATH ID: YX0500**

In the past 12 months, have your parents or guardians talked with you, even once, about not using any type of tobacco product?

- 1 Yes
- 2 No
- 8 DON'T KNOW
- 7 REFUSED

ASK: All respondents

**PATH ID: YX0200**

If your parents or guardians found you using tobacco, how do you think they would react? Would they...

- 1 Be very upset
- 2 Not be too upset
- 3 Have no reaction
- 8 DON'T KNOW
- 7 REFUSED

ASK: All respondents

**PATH ID: YX0488**

The following questions are about common psychological, behavioral, and personal problems. These problems are considered significant when you have them for two or more weeks, when they keep coming back, when they keep you from meeting your responsibilities, or when they make you feel like you can't go on.

After each of the following questions, please tell us the last time, if ever, you had the problem, by answering whether it was in the past month, 2-12 months ago, over a year ago, or never.

ASK: All respondents

**PATH ID: YX0161**

When was the last time that you had significant problems with...

Feeling very trapped, lonely, sad, blue, depressed, or hopeless about the future?

- 1 Past month
- 2 2 to 12 months ago
- 3 Over a year ago
- 4 Never
- 8 DON'T KNOW
- 7 REFUSED

ASK: All respondents

## Final Youth Baseline Questionnaire - English

**PATH ID: YX0162**

When was the last time that you had significant problems with...

Sleep trouble, such as bad dreams, sleeping restlessly, or falling asleep during the day?

- 1 Past month
- 2 2 to 12 months ago
- 3 Over a year ago
- 4 Never
- 8 DON'T KNOW
- 7 REFUSED

ASK: All respondents

**PATH ID: YX0163**

When was the last time that you had significant problems with...

Feeling very anxious, nervous, tense, scared, panicked, or like something bad was going to happen?

- 1 Past month
- 2 2 to 12 months ago
- 3 Over a year ago
- 4 Never
- 8 DON'T KNOW
- 7 REFUSED

ASK: All respondents

**PATH ID: YX0164**

When was the last time that you had significant problems with...

Becoming very distressed and upset when something reminded you of the past?

- 1 Past month
- 2 2 to 12 months ago
- 3 Over a year ago
- 4 Never
- 8 DON'T KNOW
- 7 REFUSED

ASK: All respondents

**PATH ID: YX0165**

When was the last time that you did the following things two or more times...

Lied or conned to get things you wanted or to avoid having to do something?

- 1 Past month
- 2 2 to 12 months ago
- 3 Over a year ago
- 4 Never
- 8 DON'T KNOW
- 7 REFUSED

ASK: All respondents

## Final Youth Baseline Questionnaire - English

**PATH ID: YX0166**

When was the last time that you did the following things two or more times...

Had a hard time paying attention at school, work, or home?

- 1 Past month
- 2 2 to 12 months ago
- 3 Over a year ago
- 4 Never
- 8 DON'T KNOW
- 7 REFUSED

ASK: All respondents

**PATH ID: YX0167**

When was the last time that you did the following things two or more times...

Had a hard time listening to instructions at school, work, or home?

- 1 Past month
- 2 2 to 12 months ago
- 3 Over a year ago
- 4 Never
- 8 DON'T KNOW
- 7 REFUSED

ASK: All respondents

**PATH ID: YX0168**

When was the last time that you did the following things two or more times...

Were a bully or threatened other people?

- 1 Past month
- 2 2 to 12 months ago
- 3 Over a year ago
- 4 Never
- 8 DON'T KNOW
- 7 REFUSED

ASK: All respondents

**PATH ID: YX0169**

When was the last time that you did the following things two or more times...

Started physical fights with other people?

- 1 Past month
- 2 2 to 12 months ago
- 3 Over a year ago
- 4 Never
- 8 DON'T KNOW
- 7 REFUSED

ASK: All respondents

## Final Youth Baseline Questionnaire - English

**PATH ID: YX0250**

When was the last time that you did the following things two or more times...

Felt restless or the need to run around or climb on things?

- 1 Past month
- 2 2 to 12 months ago
- 3 Over a year ago
- 4 Never
- 8 DON'T KNOW
- 7 REFUSED

ASK: All respondents

**PATH ID: YX0251**

When was the last time that you did the following things two or more times...

Gave answers before the other person finished asking the question?

- 1 Past month
- 2 2 to 12 months ago
- 3 Over a year ago
- 4 Never
- 8 DON'T KNOW
- 7 REFUSED

ASK: All respondents

## Final Youth Baseline Questionnaire - English

### SUBSTANCE USE SECTION

**PATH ID: YX0084**

The next questions ask about your use of alcohol and other drugs. Remember all the information you give to the PATH Study will be kept private.

Have you ever used alcohol at all, including sips of someone's drink or your own drink?

- |    |            |              |
|----|------------|--------------|
| 1  | Yes        |              |
| 2  | No         | GO TO YX0085 |
| -8 | DON'T KNOW | GO TO YX0085 |
| -7 | REFUSED    | GO TO YX0085 |

ASK: All respondents

**PATH ID: YX0086**

About how old were you when you first drank alcohol at all, counting small tastes or sips?

- |    |            |              |
|----|------------|--------------|
| 1  | _ _        | GO TO YX0074 |
| -8 | DON'T KNOW |              |
| -7 | REFUSED    |              |

ASK: Respondents who have ever used alcohol (YX0084=1)

DISPLAY: Display "Years old" as a title.

**PATH ID: YX0087**

When you first drank alcohol at all, counting small tastes or sips, were you...

- |    |                         |
|----|-------------------------|
| 1  | Less than 12 years old, |
| 2  | 12 to 14 years old, or  |
| 3  | 15 to 17 years old?     |
| -8 | DON'T KNOW              |
| -7 | REFUSED                 |

ASK: Respondents who refused to give or did not know age (YX0086 = -8, -7).

**PATH ID: YX0074**

About how old were you when you had your first alcoholic drink, other than small tastes or sips? A drink is a can or bottle of beer; a wine cooler or a glass of wine, champagne, or sherry; a shot of liquor or a mixed drink or cocktail.

- |    |                                                                     |              |
|----|---------------------------------------------------------------------|--------------|
| 1  | I have never had an alcoholic drink other than small tastes or sips | GO TO YX0085 |
| 2  | _ _ _                                                               |              |
| -8 | DON'T KNOW                                                          |              |
| -7 | REFUSED                                                             |              |

ASK: Respondents who have ever used alcohol (YX0084=1)

PROGRAM: Display as numeric quantity field with button "I have never had an alcoholic drink other than small tastes or sips" on left.

DISPLAY: Display "Years old" as a title.

## Final Youth Baseline Questionnaire - English

**PATH ID: YX0270**

When you had your first alcoholic drink, were you...

- 1 Less than 12 years old,
- 2 12 to 14 years old, or
- 3 15 to 17 years old?
- 8 DON'T KNOW
- 7 REFUSED

ASK: Respondents who refused to give or did not know age (YX0074=DK,R)

GO TO: If Ever User Tobacco (EVER\_USE\_TOB=1), go to YX0077

Else go to YX0073

**PATH ID: YX0077**

[At the age that you first started drinking | When you were AGE OF ALCOHOL USE years old], did you also [smoke cigarettes | use tobacco products | smoke cigarettes or use other tobacco products]?

- 1 Yes
- 2 No
- 8 DON'T KNOW
- 7 REFUSED

ASK: Ever tobacco users (EVER\_USE\_TOB=1) if onset of tobacco use precedes onset of alcohol use (age in YC1006 or YE1006 or YG1006 or YP1006 or YH1006 or YS1006 or YD1006 or YB1006 < age in YX0074).

PROGRAM: If YX0074=-8 or -7, display "At the age that you started drinking". If YX0074 NE -8 or -7, display "When you were AGE OF ALCOHOL USE years old" and fill with age reported in YX0074.

If cigarette-only user (EVER\_USE\_CIGS=1), display "smoke cigarettes".

If non-cigarette tobacco user (EVER\_USE\_TOBXCIGS=1), display "use tobacco products".

If cigarette and tobacco user (EVER\_USE\_DUAL=1), display "smoke cigarettes or use other tobacco products".

**PATH ID: YX0073**

How long has it been since you last used alcohol? Was it ...

- 1 Within the past 30 days
- 2 More than 30 days ago, but within the past year GO TO YX0085
- 3 More than a year ago GO TO YX0085
- 8 DON'T KNOW GO TO YX0085
- 7 REFUSED GO TO YX0085

ASK: Respondents who have ever used alcohol (VALID AGE REPORTED IN YX0074 OR YX0270>0).



## Final Youth Baseline Questionnaire - English

**PATH ID: YX0271**

When you first used marijuana, hash, THC, grass, pot, or weed, were you...

- 1 Less than 12 years old,
- 2 12 to 14 years old, or
- 3 15 to 17 years old?
- 8 DON'T KNOW
- 7 REFUSED

ASK: Respondents who refused to give or did not know age (YX0079=DK,R)

GO TO: If Ever User Tobacco (EVER\_USE\_TOB=1), go to YX0080

Else go to YX0089

**PATH ID: YX0080**

[At the age that you first started using marijuana, hash, THC, grass, pot or weed | When you were AGE OF MARIJUANA USE years old], did you also [smoke cigarettes | use tobacco products | smoke cigarettes or use other tobacco products]?

- 1 Yes
- 2 No
- 8 DON'T KNOW
- 7 REFUSED

ASK: Ever tobacco users (EVER\_USE\_TOB=1) if onset of tobacco use precedes onset of marijuana use (age in YC1006 or YE1006 or YG1006 or YP1006 or YH1006 or YS1006 or YD1006 or YB1006 < age in YX0079).

PROGRAM: If YX0079=-8 or -7, display "At the age that you first started using marijuana, hash, THC, grass, pot, or weed". If YX0079 NE -8 or -7, display "When you were AGE OF MARIJUANA USE years old" and fill with age reported in YX0079.

If cigarette-only user (EVER\_USE\_CIGS=1), display "smoke cigarettes".

If non-cigarette tobacco user (EVER\_USE\_TOBXCIGS=1), display "use tobacco products".

If cigarette and tobacco user (EVER\_USE\_DUAL=1), display "smoke cigarettes or use other tobacco products".

**PATH ID: YX0078**

How long has it been since you last used marijuana, hash, THC, grass, pot or weed? Was it...

- 1 Within the past 30 days
- 2 More than 30 days ago, but within the past year
- 3 More than a year ago
- 8 DON'T KNOW
- 7 REFUSED

ASK: Respondents who have ever used marijuana (YX0085=1 OR YG9105=1)

### BOX – DISPLAY INSTRUCTIONS

For YX0089, display a "Yes" and "No" column with options for each response category.



## Final Youth Baseline Questionnaire - English

**PATH ID: YX0089**

Have you ever used any of the following prescription drugs that were not prescribed for you or that you took only for the experience or feeling they caused?

- 1 Ritalin® or Adderall®
- 2 Painkillers, sedatives, or tranquilizers
- 8 DON'T KNOW
- 7 REFUSED

ASK: All respondents

### BOX – DISPLAY INSTRUCTIONS

For YX0220, display a “Yes” and “No” column with options for each response category.

**PATH ID: YX0220**

Have you ever used any of the following substances?

- 1 Cocaine or crack
- 2 Stimulants like methamphetamine or speed
- 3 Any other drugs like heroin, inhalants, solvents, or hallucinogens
- 8 DON'T KNOW
- 7 REFUSED

ASK: All respondents

### BOX – FILL INSTRUCTIONS

CREATE [SUBSTANCEFILL]

Display: If YX0089[1]=1, display ‘Ritalin® or Adderall®’

If YX0089[2]=1, display ‘painkillers, sedatives, or tranquilizers’

If YX0220[1]=1, display ‘cocaine or crack’

If YX0220[2]=1, display ‘stimulants like methamphetamine or speed’

If YX0220[3]=3, display ‘any other drugs like heroin, inhalants, solvents, or hallucinogens’

Repeat YX0081- YX0083 for each group of substances respondent reports ever using in YX0089 AND YX0220 in a loop. Ask YX0089 first, then loop through YX0081-YX0083 appropriately. Then ask YX0220, then loop through YX0081-YX0083 appropriately.

Else, GO TO BOX SA

**PATH ID: YX0082**

How old were you when you first used [SUBSTANCEFILL]?

- 1 |\_\_|\_\_| GO TO YX0083
- 8 DON'T KNOW
- 7 REFUSED

ASK: Respondents that have ever used [SUBSTANCEFILL] (YX0089[1]=1 OR YX0089[2]=1 OR YX0220[1]=1 OR YX0220[2]=1 OR YX0220[3]=1)

DISPLAY: Display “Years old” as a title.

## Final Youth Baseline Questionnaire - English

**PATH ID: YX0272**

When you first used [SUBSTANCEFILL], were you...

- 1 Less than 12 years old,
- 2 12 to 14 years old, or
- 3 15 to 17 years old?
- 8 DON'T KNOW
- 7 REFUSED

ASK: Respondents who refused to give or did not know age (YX0082=-8 or -7)

GO TO: If Ever User Tobacco (EVER\_USE\_TOB=1), go to YX0083

Else go to YX0081.

**PATH ID: YX0083**

[At the age that you first started using [SUBSTANCEFILL] | When you were AGE OF SUBSTANCE USE years old], did you also [smoke cigarettes | use tobacco products | smoke cigarettes or use other tobacco products]?

- 1 Yes
- 2 No
- 8 DON'T KNOW
- 7 REFUSED

ASK: Ever tobacco users (EVER\_USE\_TOB=1) if onset of tobacco use precedes onset of substance use (age in YC1006 or YE1006 or YG1006 or YP1006 or YH1006 or YS1006 or YD1006 or YB1006 < age in YX0082).

PROGRAM: If YX0082=-8 or -7, display "At the age that you first started using [SUBSTANCEFILL]". If YX0082 NE -8 or -7, display "When you were AGE OF SUBSTANCE USE years old" and fill with age reported in YX0082.

If cigarette-only user (EVER\_USE\_CIGS=1), display "smoke cigarettes".

If non-cigarette tobacco user (EVER\_USE\_TOBXCIGS=1), display "use tobacco products".

If cigarette and tobacco user (EVER\_USE\_DUAL=1), display "smoke cigarettes or use other tobacco products".

**PATH ID: YX0081**

How long has it been since you last used [SUBSTANCEFILL]? Was it...

- 1 Within the past 30 days
- 2 More than 30 days ago, but within the past year
- 3 More than a year ago
- 8 DON'T KNOW
- 7 REFUSED

ASK: Respondents that have ever used [SUBSTANCEFILL] (YX0089[1]=1 OR YX0089[2]=1 OR YX0220[1]=1 OR YX0220[2]=1 OR YX0220[3]=1)

## Final Youth Baseline Questionnaire - English

### BOX SA

#### PROGRAM:

If respondent reports using at least one substance in [(VALID AGE REPORTED IN YX0074 OR YX0270>0) OR YX0085=1 OR YG9105=1 OR YX0089[1]=1 OR YX0089[2]=1 OR YX0220[1]=1 OR YX0220[2]=1 OR YX0220[3]=1], GO TO YX0170.

If no substances were selected in [(YX0084=2, -8 or -7 OR YX0074=1, -8 or -7 OR YX0270<0) AND YX0085=2, -8 or -7 AND YX0089[1]=2, -8 or -7 AND YX0089[2]=2, -8 or -7 AND YX0220[1]=2, -8 or -7 AND YX0220[2]=2, -8 or -7 AND YX0220[3]=2, -8 or -7], GO TO YX0510.

### PATH ID: YX0170

When was the last time that . . .

You used alcohol or other drugs weekly or more often?

- 1 Past month
- 2 2 to 12 months ago
- 3 Over a year ago
- 4 Never
- 8 DON'T KNOW
- 7 REFUSED

ASK: Respondents who report ever using alcohol or ever using drugs ((VALID AGE REPORTED IN YX0074 OR YX0270>0) OR YX0085=1 OR YG9105=1 OR YX0089[1]=1 OR YX0089[2]=1 OR YX0220[1]=1 OR YX0220[2]=1 OR YX0220[3]=1)

### BOX SA2

If respondent reports ever using only one substance (ONE SELECTED IN (VALID AGE REPORTED IN YX0074 OR YX0270>0) OR YX0085=1 OR YG9105=1 OR YX0089[1]=1 OR YX0089[2]=1 OR YX0220[1]=1 OR YX0220[2]=1 OR YX0220[3]=1), go to YX0171.

If respondent reports ever using two or more substances (TWO OR MORE SELECTED IN (VALID AGE REPORTED IN YX0074 OR YX0270>0) OR YX0085=1 OR YG9105=1 OR YX0089[1]=1 OR YX0089[2]=1 OR YX0220[1]=1 OR YX0220[2]=1 OR YX0220[3]=1), go to YX0175.

## Final Youth Baseline Questionnaire - English

**PATH ID: YX0175**

You mentioned that you used alcohol or drugs at least weekly sometime in the past. Which substances did you use weekly or more often? Please do not include drugs that were prescribed for you. Choose all that apply.

- 1 Alcohol
- 2 Marijuana, hash, THC, grass, pot, or weed
- 3 Ritalin® or Adderall®
- 4 Painkillers, sedatives, or tranquilizers
- 5 Cocaine or crack
- 6 Stimulants like methamphetamine or speed
- 7 Any other drugs like heroin, inhalants, solvents, or hallucinogens.
- 8 DON'T KNOW
- 7 REFUSED

ASK: All respondents who used alcohol or other drugs weekly or more often (YX0170=1,2,3) AND report ever using two or more substances (TWO OR MORE SELECTED IN (VALID AGE REPORTED IN YX0074 OR YX0270>0) OR YX0085=1 OR YG9105=1 OR YX0089[1]=1 OR YX0089[2]=1 OR YX0220[1]=1 OR YX0220[2]=1 OR YX0220[3]=1).

PROGRAM: List only those substances a respondent previously indicated he/she used. Display option 1 if VALID AGE REPORTED IN YX0074 OR YX0270>0); display option 2 if YX0085=1 OR YG9105=1; display option 3 if YX0089[1]=1; display option 4 if YX0089[2]=1; display option 5 if YX0220[1]=1; display option 6 if YX0220[2]=1; display option 7 if YX0220[3]=1.

GO TO: If YX0193 IN (1,2,3) OR YX0172 IN (1,2,3) OR YX0173 IN (1,2,3) OR YX0174 IN (1,2,3) OR YX0194 IN (1,2,3), go to YX0176.

Else go to YX0510

**PATH ID: YX0171**

When was the last time that...

You spent a lot of time getting alcohol or other drugs?

- 1 Past month
- 2 2 to 12 months ago
- 3 Over a year ago
- 4 Never
- 8 DON'T KNOW
- 7 REFUSED

ASK: Respondents who report ever using alcohol or ever using drugs (VALID AGE REPORTED IN YX0074 OR YX0270>0) OR YX0085=1 OR YG9105=1 OR YX0089[1]=1 OR YX0089[2]=1 OR YX0220[1]=1 OR YX0220[2]=1 OR YX0220[3]=1)

## Final Youth Baseline Questionnaire - English

**PATH ID: YX0193**

When was the last time that...

You spent a lot of time using or recovering from alcohol or other drugs?

- 1 Past month
- 2 2 to 12 months ago
- 3 Over a year ago
- 4 Never
- 8 DON'T KNOW
- 7 REFUSED

ASK: Respondents who report ever using alcohol or ever using drugs (VALID AGE REPORTED IN YX0074 OR YX0270>0) OR YX0085=1 OR YG9105=1 OR YX0089[1]=1 OR YX0089[2]=1 OR YX0220[1]=1 OR YX0220[2]=1 OR YX0220[3]=1)

**PATH ID: YX0172**

When was the last time that...

You kept using alcohol or other drugs even though it was causing social problems, leading to fights, or getting you into trouble with other people?

- 1 Past month
- 2 2 to 12 months ago
- 3 Over a year ago
- 4 Never
- 8 DON'T KNOW
- 7 REFUSED

ASK: Respondents who report ever using alcohol or ever using drugs (VALID AGE REPORTED IN YX0074 OR YX0270>0) OR YX0085=1 OR YG9105=1 OR YX0089[1]=1 OR YX0089[2]=1 OR YX0220[1]=1 OR YX0220[2]=1 OR YX0220[3]=1)

**PATH ID: YX0173**

When was the last time that...

Your use of alcohol or other drugs reduced your involvement with activities at work, school, home, or social events?

- 1 Past month
- 2 2 to 12 months ago
- 3 Over a year ago
- 4 Never
- 8 DON'T KNOW
- 7 REFUSED

ASK: Respondents who report ever using alcohol or ever using drugs (VALID AGE REPORTED IN YX0074 OR YX0270>0) OR YX0085=1 OR YG9105=1 OR YX0089[1]=1 OR YX0089[2]=1 OR YX0220[1]=1 OR YX0220[2]=1 OR YX0220[3]=1)

## Final Youth Baseline Questionnaire - English

**PATH ID: YX0174**

When was the last time that...

You had withdrawal problems such as shaky hands, throwing up, having trouble sitting still or sleeping?

- 1 Past month
- 2 2 to 12 months ago
- 3 Over a year ago
- 4 Never
- 8 DON'T KNOW
- 7 REFUSED

ASK: Respondents who report ever using alcohol or ever using drugs (VALID AGE REPORTED IN YX0074 OR YX0270>0) OR YX0085=1 OR YG9105=1 OR YX0089[1]=1 OR YX0089[2]=1 OR YX0220[1]=1 OR YX0220[2]=1 OR YX0220[3]=1)

**PATH ID: YX0194**

When was the last time that...

You used any alcohol or other drugs to stop being sick or avoid withdrawal problems?

- 1 Past month
- 2 2 to 12 months ago
- 3 Over a year ago
- 4 Never
- 8 DON'T KNOW
- 7 REFUSED

ASK: Respondents who report ever using alcohol or ever using drugs (VALID AGE REPORTED IN YX0074 OR YX0270>0) OR YX0085=1 OR YG9105=1 OR YX0089[1]=1 OR YX0089[2]=1 OR YX0220[1]=1 OR YX0220[2]=1 OR YX0220[3]=1)

**PATH ID: YX0176**

You mentioned that alcohol or drugs caused some problems for you. Which substances caused these problems? Please do not include drugs that were prescribed for you. Choose all that apply.

- 1 Alcohol
- 2 Marijuana, hash, THC, grass, pot, or weed
- 3 Ritalin® or Adderall®
- 4 Painkillers, sedatives, or tranquilizers
- 5 Cocaine or crack
- 6 Stimulants like methamphetamine or speed
- 7 Any other drugs like heroin, inhalants, solvents, or hallucinogens
- 8 DON'T KNOW
- 7 REFUSED

ASK: All respondents who indicated alcohol or drugs caused problems for them (YX0193 IN (1,2,3) OR YX0172 IN (1,2,3) OR YX0173 IN (1,2,3) OR YX0174 IN (1,2,3) OR YX0194 IN (1,2,3)),

PROGRAM: List only those substances a respondent previously indicated he/she used. Display option 1 if VALID AGE REPORTED IN YX0074 OR YX0270>0); display option 2 if YX0085=1 OR YG9105=1; display option 3 if YX0089[1]=1; display option 4 if YX0089[2]=1; display option 5 if YX0220[1]=1; display option 6 if YX0220[2]=1; display option 7 if YX0220[3]=1.

## Final Youth Baseline Questionnaire - English

**PATH ID: YX0510**

Please tell me how much you agree or disagree with each of the following statements:

I like to do frightening things.

- 1 Strongly agree
- 2 Agree
- 3 Neither agree nor disagree
- 4 Disagree
- 5 Strongly disagree
- 8 DON'T KNOW
- 7 REFUSED

ASK: All respondents

**PATH ID: YX0515**

I like new and exciting experiences, even if I have to break the rules. Do you...

- 1 Strongly agree
- 2 Agree
- 3 Neither agree nor disagree
- 4 Disagree
- 5 Strongly disagree
- 8 DON'T KNOW
- 7 REFUSED

ASK: All respondents

**PATH ID: YX0520**

I prefer friends who are exciting and unpredictable. Do you...

- 1 Strongly agree
- 2 Agree
- 3 Neither agree nor disagree
- 4 Disagree
- 5 Strongly disagree
- 8 DON'T KNOW
- 7 REFUSED

ASK: All respondents

## AD EXPOSURE SECTION

DISPLAY TRANSITION TEXT: The following questions ask about tobacco advertising that you may have seen.

**PATH ID: YX0197**

What is the brand of your favorite tobacco advertisement? If you do not see the brand listed below, select "Something else".

- 1 I do not have a favorite tobacco advertisement
- 2 American Spirit
- 3 Basic
- 4 Beechnut
- 5 Benson & Hedges
- 6 Black & Mild
- 7 Blu
- 8 Camel
- 9 Capri
- 10 Copenhagen
- 11 Doral
- 12 Dutch Masters
- 13 Grizzly
- 14 Kool
- 15 Levi Garrett
- 16 Liggett Select
- 17 Marlboro
- 18 Maverick
- 19 Misty
- 20 Newport
- 21 NJOY
- 22 Pall Mall
- 23 Parliament
- 24 Phillies Blunts
- 25 Prime Time
- 26 Redman
- 27 Salem
- 28 Skoal
- 29 Smoking Everywhere
- 30 Sonoma
- 31 Swisher Sweets
- 32 USA Gold
- 33 Virginia Slims
- 34 Winchester
- 35 Winston



## Final Youth Baseline Questionnaire - English

- 36 Something else SPECIFY: \_\_\_\_\_  
-8 DON'T KNOW  
-7 REFUSED

ASK: All respondents

### **PATH ID: YX0181**

DISPLAY 20 RANDOMLY SELECTED TOBACCO ADS HERE, ONE AT A TIME. THE SELECTION OF SPECIFIC ADS WILL BE MADE JUST PRIOR TO LAUNCH OF FIELD OPERATIONS BASED ON THE MOST CURRENT INFORMATION.

EACH PICTURE SHOWS A TOBACCO ADVERTISEMENT

In the past 12 months, have you seen this advertisement before this study?

- 1 Yes  
2 No  
-8 DON'T KNOW  
-7 REFUSED

ASK: All respondents

### **PATH ID: YX0184**

How much do you like this advertisement? Do you...

- 1 Like this ad  
2 Have no opinion about this ad  
3 Dislike this ad  
-8 DON'T KNOW  
-7 REFUSED

ASK: All respondents

GO TO: If respondent is an emancipated youth, continue to the emancipated youth module. Else, go to demographics section

Final Youth Baseline Questionnaire - English

**DEMOGRAPHICS SECTION**

|                        |            |              |
|------------------------|------------|--------------|
| <b>PATH ID: YM0004</b> |            |              |
| What is your sex?      |            |              |
| 1                      | Male       | GO TO YM0019 |
| 2                      | Female     |              |
| -8                     | DON'T KNOW | GO TO YM0019 |
| -7                     | REFUSED    | GO TO YM0019 |
| ASK: All respondents   |            |              |

|                                    |            |              |
|------------------------------------|------------|--------------|
| <b>PATH ID: YX0136</b>             |            |              |
| Are you currently pregnant?        |            |              |
| 1                                  | Yes        |              |
| 2                                  | No         | GO TO YM0019 |
| -8                                 | DON'T KNOW | GO TO YM0019 |
| -7                                 | REFUSED    | GO TO YM0019 |
| ASK: Female respondents (YM0004=2) |            |              |

|                                                                            |                |  |
|----------------------------------------------------------------------------|----------------|--|
| <b>PATH ID: YX0137</b>                                                     |                |  |
| How many weeks or months pregnant? (Enter number of months or weeks)       |                |  |
| 1                                                                          | I__I__I Months |  |
| 2                                                                          | I__I__I Weeks  |  |
| -8                                                                         | DON'T KNOW     |  |
| -7                                                                         | REFUSED        |  |
| ASK: Female respondents who are currently pregnant (YM0004=2 AND YX0136=1) |                |  |
| PROGRAM: Display as Quantity/Units                                         |                |  |

|                                                                      |            |              |
|----------------------------------------------------------------------|------------|--------------|
| <b>PATH ID: YM0019</b>                                               |            |              |
| Have you been going to school at any time during the past 12 months? |            |              |
| 1                                                                    | Yes        |              |
| 2                                                                    | No         | GO TO YM0020 |
| -8                                                                   | DON'T KNOW | GO TO YM0020 |
| -7                                                                   | REFUSED    | GO TO YM0020 |
| ASK: All respondents                                                 |            |              |

## Final Youth Baseline Questionnaire - English

**PATH ID: YM0018**

What grade are you in? If you are on a holiday or summer break, please select the grade or year you will enter when you return to school.

- 1 4<sup>th</sup> grade or below
- 2 5<sup>th</sup>
- 3 6<sup>th</sup>
- 4 7<sup>th</sup>
- 5 8<sup>th</sup>
- 6 9<sup>th</sup>
- 7 10<sup>th</sup>
- 8 11<sup>th</sup>
- 9 12<sup>th</sup> grade
- 10 College, vocational or technical school
- 11 Not enrolled
- 12 I am home-schooled
- 13 My school is ungraded
- 8 DON'T KNOW
- 7 REFUSED

ASK: Respondents who did go to school in past 12 months (YM0019=1)

**PATH ID: YM0020**

What grade or year in school did you last complete?

- 1 4<sup>th</sup> grade or below
- 2 5<sup>th</sup>
- 3 6<sup>th</sup>
- 4 7<sup>th</sup>
- 5 8<sup>th</sup>
- 6 9<sup>th</sup>
- 7 10<sup>th</sup>
- 8 11<sup>th</sup>
- 9 12<sup>th</sup> grade
- 10 College, vocational or technical school
- 11 I am home-schooled
- 12 My school is ungraded
- 8 DON'T KNOW
- 7 REFUSED

ASK: Respondents who did not go to school in past 12 months (YM0019=2 or DK or RF)

GO TO: If Non-Emancipated Youth (EYOUTH = 2), go to YX0525

If Emancipated Youth (EYOUTH = 1), go to YT0019.

## Final Youth Baseline Questionnaire - English

**BOX:**

This is the start of the Emancipated Youth questions. Questions YT0019- YT0263 are asked of emancipated youth only, with the exception of YX0525 which is asked of all youth.

GO TO: If Non-Emancipated Youth (EYOUTH = 2), go to YX0525

If Emancipated Youth (EYOUTH = 1), go to YT0019.

**PATH ID: YT0019**

How would you describe how you have performed at school in the past 12 months? Would you say your grades are..

- 1 Mostly A's
- 2 A's and B's
- 3 Mostly B's
- 4 B's and C's
- 5 Mostly C's
- 6 C's and D's
- 7 Mostly D's
- 8 D's and F's
- 9 Mostly F's
- 10 My school is ungraded
- 8 DON'T KNOW
- 7 REFUSED

ASK: All emancipated youth respondents (EYOUTH = 1)

**PATH ID: YT0030**

In the past 12 months, how often did you miss school due to illness?

- 1 Never
- 2 Rarely
- 3 Sometimes
- 4 Often
- 5 Very often
- 8 DON'T KNOW
- 7 REFUSED

ASK: All emancipated youth respondents (EYOUTH = 1)

## Final Youth Baseline Questionnaire - English

**PATH ID: YT0035**

The next questions ask about some basic medical information that is important for the study.

In general, would you say your overall health is...

- 1 Excellent
- 2 Very good
- 3 Good
- 4 Fair
- 5 Poor
- 8 DON'T KNOW
- 7 REFUSED

ASK: All emancipated youth respondents (EYOUTH = 1)

**PATH ID: YX0310**

The next questions ask about your height and weight. Do you want to answer these questions in...

- 1 Feet and pounds, or GO TO YT0007
- 2 Meters and kilograms? GO TO YX0311
- 8 DON'T KNOW GO TO YT0007
- 7 REFUSED GO TO YT0007

ASK: All emancipated youth respondents (EYOUTH = 1)

**PATH ID: YT0007**

About how tall are you without shoes?

- 1 |\_\_|  
Feet
- 2 |\_\_|\_\_|  
Inches
- 8 DON'T KNOW
- 7 REFUSED

ASK: All emancipated youth respondents (EYOUTH = 1) who prefer to answer in feet (YX0310=1, -8 or -7)

PROGRAM: Range check: Feet (3 to 8); Inches (0 to 11).

PROGRAM: Display as Quantity/Quantity. Display "Feet" and "Inches" as titles.

## Final Youth Baseline Questionnaire - English

**PATH ID: YX0311**

About how tall are you without shoes?

- 1 |\_|\_|.|\_|\_|  
Meters
- 8 DON'T KNOW
- 7 REFUSED

ASK: All emancipated youth respondents (EYOUTH = 1) who prefer to answer in meters (YX0310=2)

PROGRAM: Range check: Meters (0.9 to 2.7).

PROGRAM: Display "Meters" as a title.

**PATH ID: YT0008**

About how much do you weigh without clothes or shoes?

- 1 |\_|\_|\_|\_|  
Pounds
- 8 DON'T KNOW
- 7 REFUSED

ASK: All emancipated youth respondents (EYOUTH = 1) who prefer to answer in pounds (YX0310=1, -8 or -7)

PROGRAM: Range check: Pounds (75 to 450).

PROGRAM: Display "Pounds" as a title.

**PATH ID: YX0312**

About how much do you weigh without clothes or shoes?

- 1 |\_|\_|\_|\_|  
Kilograms
- 8 DON'T KNOW
- 7 REFUSED

ASK: All emancipated youth respondents (EYOUTH = 1) who prefer to answer in kilograms (YX0310=2)

PROGRAM: Range check: Kilograms (34 to 205).

PROGRAM: Display "Kilograms" as a title.

**PATH ID: YX0302**

In the past 12 months, have you visited an emergency room or urgent care center for a health problem, accident or injury?

- 1 Yes
- 2 No GO TO YX0186
- 8 DON'T KNOW GO TO YX0186
- 7 REFUSED GO TO YX0186

ASK: All emancipated youth respondents (EYOUTH = 1)

## Final Youth Baseline Questionnaire - English

**PATH ID: YT0034**

How many visits to the emergency room or urgent care center have you made in the past 12 months?

1 |\_|\_|\_|

-8 DON'T KNOW

-7 REFUSED

ASK: Emancipated youth respondents (EYOUTH = 1) who have visited an emergency room or urgent care in the past 12 months (YX0302=1).

**PATH ID: YX0186**

Do you have serious difficulty walking or climbing stairs?

1 Yes

2 No

-8 DON'T KNOW

-7 REFUSED

ASK: All emancipated youth respondents (EYOUTH = 1)

**PATH ID: YX0188**

Do you have difficulty dressing or bathing?

1 Yes

2 No

-8 DON'T KNOW

-7 REFUSED

ASK: All emancipated youth respondents (EYOUTH = 1)

**PATH ID: YX0191**

Are you blind or do you have serious difficulty seeing, even when wearing glasses?

1 Yes

2 No

-8 DON'T KNOW

-7 REFUSED

ASK: All emancipated youth respondents (EYOUTH = 1)

**PATH ID: YX0190**

Are you deaf or do you have serious difficulty hearing?

1 Yes

2 No

-8 DON'T KNOW

-7 REFUSED

ASK: All emancipated youth respondents (EYOUTH = 1)

## Final Youth Baseline Questionnaire - English

**PATH ID: YX0189**

Because of a physical, mental, or emotional condition, do you have serious difficulty concentrating, remembering, or making decisions?

- 1 Yes
- 2 No
- 8 DON'T KNOW
- 7 REFUSED

ASK: All emancipated youth respondents (EYOUTH = 1)

**PATH ID: YX0187**

Because of a physical, mental, or emotional condition, do you have difficulty doing errands alone such as visiting a doctor's office or shopping?

- 1 Yes
- 2 No
- 8 DON'T KNOW
- 7 REFUSED

ASK: Emancipated youth respondents (EYOUTH = 1) who are 15 years old or older (AGE >= 15)

**PATH ID: YT0050**

Have you ever been told by a doctor or other health professional that you have high blood pressure?

- 1 Yes
- 2 No GO TO YT0051
- 8 DON'T KNOW GO TO YT0051
- 7 REFUSED GO TO YT0051

ASK: All emancipated youth respondents (EYOUTH = 1)

**PATH ID: YT0041**

How old were you when you were first told you had high blood pressure?

- 1 |\_|\_|\_|\_| GO TO YT0051
- 8 DON'T KNOW
- 7 REFUSED

ASK: If emancipated youth (EYOUTH = 1) ever had high blood pressure (YT0050=1)

DISPLAY: Display "Years old" as a title.



## Final Youth Baseline Questionnaire - English

**PATH ID: YT0253**

When you were first told you had high blood pressure, were you...

- 1 Less than 12 years old,
- 2 12 to 14 years old, or
- 3 15 to 17 years old?
- 8 DON'T KNOW
- 7 REFUSED

ASK: Emancipated youth respondents (EYOUTH = 1) who refused to give or did not know age (YT0041=DK,R)

**PATH ID: YT0051**

Have you ever been told by a doctor or other health professional that you have high cholesterol?

- 1 Yes
- 2 No GO TO YX0525
- 8 DON'T KNOW GO TO YX0525
- 7 REFUSED GO TO YX0525

ASK: All emancipated youth respondents (EYOUTH = 1)

**PATH ID: YT0043**

How old were you when you were first told you had high cholesterol?

- 1 |\_\_|\_\_|\_\_| GO TO YX0525
- 8 DON'T KNOW
- 7 REFUSED

ASK: If emancipated youth (EYOUTH = 1) ever had a cholesterol problem (YT0051=1)

DISPLAY: Display "Years old" as a title.

**PATH ID: YT0254**

When you were first told you had high cholesterol, were you...

- 1 Less than 12 years old,
- 2 12 to 14 years old, or
- 3 15 to 17 years old?
- 8 DON'T KNOW
- 7 REFUSED

ASK: Emancipated youth respondents (EYOUTH = 1) who refused to give or did not know age (YT0043=DK,R)

## Final Youth Baseline Questionnaire - English

**PATH ID: YX0525**

[The next question asks about your health.]

Do you have shortness of breath or is it hard to exercise compared to your peers?

- 1 Yes
- 2 No
- 8 DON'T KNOW
- 7 REFUSED

ASK: All respondents

PROGRAM: If EYOUTH = 2, display "The next question asks about your health." If EYOUTH = 1, do not display this text.

GO TO: If non emancipated youth (EYOUTH = 2), go to YM0021

If emancipated youth (EYOUTH = 1), go to YT0031.

**PATH ID: YT0031**

Have you ever been told by a doctor or other health professional that you have asthma?

- 1 Yes
- 2 No GO TO YT0033
- 8 DON'T KNOW GO TO YT0033
- 7 REFUSED GO TO YT0033

ASK: All emancipated youth respondents (EYOUTH = 1)

**PATH ID: YT0038**

How old were you when you were first told you had asthma?

- 1 |\_\_|\_\_|\_\_|\_\_| GO TO YT0022
- 8 DON'T KNOW
- 7 REFUSED

ASK: If emancipated youth (EYOUTH = 1) ever had asthma (YT0031=1)

DISPLAY: Display "Years old" as a title.

**PATH ID: YT0260**

When you were first told you had asthma, were you...

- 1 Less than 12 years old,
- 2 12 to 14 years old, or
- 3 15 to 17 years old?
- 8 DON'T KNOW
- 7 REFUSED

ASK: Emancipated youth respondents (EYOUTH = 1) who refused to give or did not know age (YT0038=DK,R)

## Final Youth Baseline Questionnaire - English

**PATH ID: YT0022**

In the past 12 months, have you taken medications regularly for asthma?

(Taken regularly means according to a health care provider's instructions.)

- |    |            |              |
|----|------------|--------------|
| 1  | Yes        |              |
| 2  | No         | GO TO YT0125 |
| -8 | DON'T KNOW | GO TO YT0125 |
| -7 | REFUSED    | GO TO YT0125 |

ASK: Emancipated youth respondents (EYOUTH = 1) that have ever had asthma (YT0031=1).

DISPLAY INSTRUCTION: For YT0036, display as a stem and leaf question. For each leaf, display a yes/no response.

**PATH ID: YT0036**

In the past 12 months, which of the following medications did you regularly take for asthma?

- 1 Quick-relief inhaler - for example: albuterol (ProAir, Ventolin, Xopenex), ipratropium (Atrovent), or a combination inhaler (Combivent)
- 2 Controller or long-acting inhaler including steroid inhaler – for example: beclomethasone (Qvar), fluticasone (Flovent), salmeterol (Serevent), tiotropium (Spiriva), or a combination inhaler (Advair)
- 3 Other controlling medication – for example: montelukast (Singulair), zafirlukast (Accolate), theophylline, roflumilast (Daliresp)
- 4 Oral or injected steroid medication – for example: prednisone, prednisolone (Orapred), dexamethasone (Decadron)
- 5 Oxygen therapy
- 6 Other asthma medication
- 8 DON'T KNOW
- 7 REFUSED

ASK: If emancipated youth (EYOUTH = 1) took medications for asthma (YT0022=1)

**PATH ID: YT0125**

In the past 12 months, have you had an asthma attack that required use of an oral or injected steroid medication at the time of the attack? Examples of oral or injected steroid medications include prednisone, prednisolone (Orapred), and dexamethasone (Decadron).

- |    |            |              |
|----|------------|--------------|
| 1  | Yes        |              |
| 2  | No         | GO TO YT0127 |
| -8 | DON'T KNOW | GO TO YT0127 |
| -7 | REFUSED    | GO TO YT0127 |

ASK: If emancipated youth (EYOUTH = 1) ever had asthma (YT0031=1)

## Final Youth Baseline Questionnaire - English

**PATH ID: YT0039**

In the past 12 months, how many asthma attacks have you had that required use of an oral or injected steroid medication at the time of the attack?

1 |\_\_|\_\_|\_\_|

-8 DON'T KNOW

-7 REFUSED

ASK: If emancipated youth (EYOUTH = 1) ever had asthma attack and needed medication (YT0125=1)

**PATH ID: YT0127**

In the past 12 months, have you had to visit an emergency room or urgent care center because of asthma?

1 Yes

2 No

GO TO YT0033

-8 DON'T KNOW

GO TO YT0033

-7 REFUSED

GO TO YT0033

ASK: If emancipated youth (EYOUTH = 1) ever had asthma (YT0031=1)

**PATH ID: YT0282**

In the past 12 months, how many times have you had to visit an emergency room or urgent care center because of asthma?

1 |\_\_|\_\_|\_\_|

-8 DON'T KNOW

-7 REFUSED

ASK: If emancipated youth (EYOUTH = 1) ever had to go to emergency room for asthma (YT0127=1)

**PATH ID: YT0033**

In the past 12 months, have you been told by a doctor or other health professional that you have bronchitis, pneumonia, or chronic cough?

1 Yes

GO TO YT0052

2 No

-8 DON'T KNOW

GO TO YT0052

-7 REFUSED

GO TO YT0052

ASK: All emancipated youth respondents (EYOUTH = 1)

**PATH ID: YT0040**

Have you ever been told by a doctor or other health professional that you had bronchitis, pneumonia, or chronic cough?

1 Yes

2 No

-8 DON'T KNOW

-7 REFUSED

ASK: If emancipated youth (EYOUTH = 1) has not had bronchitis in past 12 months (YT0033=2)

## Final Youth Baseline Questionnaire - English

**PATH ID: YT0052**

Have you ever been told by a doctor or other health professional that you have ADHD or ADD?

- |    |            |              |
|----|------------|--------------|
| 1  | Yes        |              |
| 2  | No         | GO TO YT0049 |
| -8 | DON'T KNOW | GO TO YT0049 |
| -7 | REFUSED    | GO TO YT0049 |

ASK: All emancipated youth respondents (EYOUTH = 1)

**PATH ID: YT0048**

In the past 12 months, have you taken medications regularly for ADHD or ADD?

[Taken regularly means according to a health care provider's instructions.]

- |    |            |  |
|----|------------|--|
| 1  | Yes        |  |
| 2  | No         |  |
| -8 | DON'T KNOW |  |
| -7 | REFUSED    |  |

ASK: If emancipated youth (EYOUTH = 1) ever had ADHD/ADD (YT0052=1)

**PATH ID: YT0049**

In the past 12 months, have you been told by a doctor, dentist, or other health professional that you have dental health issues, such as cavities, gum disease or dental stains?

[Dental health issues do NOT include orthodontia or braces.]

- |    |            |              |
|----|------------|--------------|
| 1  | Yes        | GO TO YT0281 |
| 2  | No         |              |
| -8 | DON'T KNOW | GO TO YT0281 |
| -7 | REFUSED    | GO TO YT0281 |

ASK: All emancipated youth respondents (EYOUTH = 1)

**PATH ID: YT0044**

Have you ever been told by a doctor or a health professional that you have dental health issues, such as cavities, gum disease, or dental stains?

[Dental health issues do NOT include orthodontia or braces.]

- |    |            |  |
|----|------------|--|
| 1  | Yes        |  |
| 2  | No         |  |
| -8 | DON'T KNOW |  |
| -7 | REFUSED    |  |

ASK: If emancipated youth (EYOUTH = 1) has not had dental issues in past 12 months (YT0049=2)

## Final Youth Baseline Questionnaire - English

**PATH ID: YT0281**

Have you ever been told by a doctor or other health professional that you have diabetes, sugar diabetes, high blood sugar, or borderline diabetes?

- 1 Yes
- 2 No GO TO YM0004
- 8 DON'T KNOW GO TO YM0004
- 7 REFUSED GO TO YM0004

ASK: All emancipated youth respondents (EYOUTH = 1)

**PATH ID: YT0042**

How old were you when you were first told you had diabetes, sugar diabetes, or borderline diabetes?

- 1 |\_\_|\_\_|\_\_| GO TO YM0004
- 8 DON'T KNOW
- 7 REFUSED

ASK: If emancipated youth (EYOUTH = 1) ever had diabetes (YT0281=1)

DISPLAY: Display "Years old" as a title.

**PATH ID: YT0263**

When you were first told you had diabetes, sugar diabetes, high blood sugar, or borderline diabetes, were you...

- 1 Less than 12 years old,
- 2 12 to 14 years old,
- 3 15 to 17 years old?
- 8 DON'T KNOW
- 7 REFUSED

ASK: Emancipated youth respondents (EYOUTH = 1) who refused to give or did not know age (YT0042=DK,R)

**PATH ID: YM0021**

The next question asks about your level of sexual attraction to BOTH males and females. Please consider the response choices carefully, as it is important that you understand them and are as honest as you can be in your answer. To whom have you felt sexually attracted, even if you did not take any action based on feeling attracted?

- 1 Only to females, never to males
- 2 Mostly to females, and at least once to a male
- 3 About equally often to females and to males
- 4 Mostly to males, and at least once to a female
- 5 Only to males, never to females
- 6 I have never felt sexually attracted to anyone at all
- 8 DON'T KNOW
- 7 REFUSED

ASK: All respondents

NOTE: For female participants, answer categories one to five were presented in reverse order

## Final Youth Baseline Questionnaire - English

PROGRAM:  
RESPONDENTS AGE<14 GO TO YM0008  
RESPONDENTS AGE 14 AND OVER GO TO YM0022

**PATH ID: YM0022**

Do you think of yourself as:

- |   |                                                                     |              |
|---|---------------------------------------------------------------------|--------------|
| 1 | [Gay   Lesbian or gay]                                              | GO TO YM0008 |
| 2 | [Straight, that is not gay   Straight, that is, not Lesbian or gay] | GO TO YM0008 |
| 3 | Bisexual                                                            | GO TO YM0008 |
| 4 | Something else                                                      | GO TO YM0023 |

ASK: Respondents aged 14 and over

PROGRAM: Do not display the standard DK/R probe if this item is left blank. Instead, when this item is left blank, go to YM0024.

For male respondents, display the first option in the response categories. For female respondents, display the second option.

**PATH ID: YM0023**

By something else, do you mean that...

- |    |                                                                                                          |              |
|----|----------------------------------------------------------------------------------------------------------|--------------|
| 1  | You are not straight, but identify with another label such as queer, trisexual, omnisexual or pan-sexual | GO TO YM0008 |
| 2  | You are transgender, transsexual, or gender variant                                                      | GO TO YM0008 |
| 3  | You have not figured out your sexuality or are in the process of figuring it out                         | GO TO YM0008 |
| 4  | You do not think of yourself as having a sexuality                                                       | GO TO YM0008 |
| 5  | You do not use labels to identify yourself                                                               | GO TO YM0008 |
| 6  | You made a mistake and did not mean to pick this answer                                                  | GO TO YM0028 |
| 7  | You mean something else                                                                                  | GO TO YM0025 |
| -8 | DON'T KNOW                                                                                               | GO TO YM0024 |
| -7 | REFUSED                                                                                                  | GO TO YM0008 |

ASK: All respondents who selected "something else" (YM0022 = 4).

## Final Youth Baseline Questionnaire - English

**PATH ID: YM0028**

Do you think of yourself as:

- |    |                                                                     |              |
|----|---------------------------------------------------------------------|--------------|
| 1  | [Gay   Lesbian or gay]                                              | GO TO YM0008 |
| 2  | [Straight, that is not gay   Straight, that is, not Lesbian or gay] | GO TO YM0008 |
| 3  | Bisexual                                                            | GO TO YM0008 |
| 4  | Something else                                                      | GO TO YM0008 |
| -8 | DON'T KNOW                                                          | GO TO YM0024 |
| -7 | REFUSED                                                             | GO TO YM0008 |

ASK: Respondents that selected 'You made a mistake and did not mean to pick this answer' (YM0023=6)

PROGRAM: For male respondents, display the first option in the response categories. For female respondents, display the second option.

**PATH ID: YM0024**

You did not enter an answer for the question. That is because:

- |   |                                                                                                                |              |
|---|----------------------------------------------------------------------------------------------------------------|--------------|
| 1 | You don't understand the words                                                                                 | GO TO YM0008 |
| 2 | You understand the words, but you have not figured out your sexuality or are in the process of figuring it out | GO TO YM0008 |
| 3 | You mean something else                                                                                        | GO TO YM0025 |
| 4 | You don't want to answer the question                                                                          | GO TO YM0008 |

ASK: Respondents who left YM0022 blank, or "don't know" in YM0023 or YM0028 (YM0022 = blank OR YM0023 = -8 OR YM0028 = -8).

PROGRAM: If a respondent leaves this question unanswered, do not display the standard DK/R probe. Instead, go to YM0008.

**PATH ID: YM0025**

What do you mean by something else? Please type in your answer:

- |    |                   |
|----|-------------------|
| 1  | [OPEN TEXT FIELD] |
| -8 | DON'T KNOW        |
| -7 | REFUSED           |

ASK: All respondents who selected "something else" in YM0023 or YM0024 (YM0023 = 7 OR YM0024 = 3).



## Final Youth Baseline Questionnaire - English

**PATH ID: YM0008**

During an average week, how much money do you receive in total? Please include money from a job, your family, an allowance, or any other sources.

- 1 None
- 2 Less than \$1
- 3 \$1 to \$5
- 4 \$6 to \$10
- 5 \$11 to \$20
- 6 \$21 to \$50
- 7 \$51 to \$100
- 8 \$101 to \$150
- 9 \$151 or more
- 8 DON'T KNOW
- 7 REFUSED

ASK: All respondents

**PATH ID: YL3000**

You have finished [this part of] the questionnaire. Please hand the computer to the interviewer.

ASK: All respondents

If respondent is an emancipated youth (EYOUTH=1), display "this part of".

**PATH ID: YL3001**

Monitor Password: \_\_\_\_\_

The interviewer must now enter the Monitor Password into the computer.

ASK: All respondents

PROGRAM: THE MONITOR PASSWORD IS 8954

GO TO:

IF EYOUTH=1 GO TO YL3002

IF EYOUTH NE 1, GO TO LCYS01

**PATH ID: YL3002**

**YOU MUST COLLECT CONTACT INFORMATION FROM THE RESPONDENT.**

**THE RESPONDENT IS AN EMANCIPATED YOUTH.**

**PRESS 1 TO CONTINUE**

PROGRAM: This message is displayed for the interviewer only if the respondent is an emancipated youth (EYOUTH = 1)

GO TO: CONTACT INFORMATION SECTION

## Final Youth Baseline Questionnaire - English

### CONTACT INFORMATION SECTION

**BOX YL1**

CONTACT INFORMATION SECTION IS ASKED OF EMANCIPATED YOUTH ONLY (EYOUTH=1)

**PATH ID: YL0001**

I'd like to take a brief moment to confirm your contact information for my records. I'll use this information to contact you about your participation in the study.

I have your address as...

[READ ADDRESS ALOUD. THEN PRESS 1 TO CONTINUE.](#)

|        |          |       |
|--------|----------|-------|
| STREET |          | APT # |
| CITY   | STATE    | ZIP   |
| 1      | CONTINUE |       |

ASK: Emancipated youth respondents

PROGRAM: PRE-POPULATE ADDRESS FIELDS BASED ON INFO OBTAINED IN THE SCREENER. DISPLAY ADDRESS IN AN EASY TO READ FORMAT.

**PATH ID: YL0002**

Do you receive mail at this address?

|    |            |              |
|----|------------|--------------|
| 1  | YES        | GO TO YL0004 |
| 2  | NO         |              |
| -8 | DON'T KNOW | GO TO YL0004 |
| -7 | REFUSED    | GO TO YL0004 |

ASK: Emancipated youth respondents

**PATH ID: YL0003**

Can I please have your mailing address?

[VERIFY ALL SPELLING.](#)

|                 |       |     |
|-----------------|-------|-----|
| MAILING ADDRESS |       |     |
| CITY            | STATE | ZIP |

PROGRAM: If Mailing Address is don't know or refused, continue on to ask the rest of the address fields.

## Final Youth Baseline Questionnaire - English

**PATH ID: YL0004**

What is the best telephone number to reach you?

ENTER THE NUMBERS ONLY. DO NOT ENTER HYPHENS OR OTHER SYMBOLS.

\_\_\_\_\_

AREA CODE

\_\_\_\_\_

PHONE NUMBER

\_\_\_\_\_

EXT

ASK: Emancipated youth respondents

PROGRAM: If the area code is don't know or refused, do not ask the rest of the phone number or the extension.

Allow blank fields/missing data.

**PATH ID: YL0005**

Is this a home or cell phone number?

- |    |            |              |
|----|------------|--------------|
| 1  | HOME       | GO TO YL0006 |
| 2  | CELL       | GO TO YL0032 |
| 3  | OTHER      | GO TO YL0006 |
| -8 | DON'T KNOW | GO TO YL0006 |
| -7 | REFUSED    | GO TO YL0006 |

ASK: Emancipated youth respondents who provided a phone number in YL0004.

**PATH ID: YL0032**

May we contact you by text message at this number?

- |    |            |
|----|------------|
| 1  | YES        |
| 2  | NO         |
| -8 | DON'T KNOW |
| -7 | REFUSED    |

ASK: Emancipated youth respondents who said their best number is a cell phone (YL0005=2).

**PATH ID: YL0006**

Is there a second telephone number where you can be reached?

ENTER THE NUMBERS ONLY. DO NOT ENTER HYPHENS OR OTHER SYMBOLS.

\_\_\_\_\_

AREA CODE

\_\_\_\_\_

PHONE NUMBER

\_\_\_\_\_

EXT

ASK: Emancipated youth respondents

PROGRAM: If the area code is don't know or refused, do not ask the rest of the phone number or the extension.

Allow blank fields/missing data.



## Final Youth Baseline Questionnaire - English

**PATH ID: YL0018**

Do you anticipate moving or relocating either permanently or temporarily in the next 6 to 12 months?

- 1 YES
- 2 NO GO TO YL0020
- 3 MAYBE
- 8 DON'T KNOW GO TO YL0020
- 7 REFUSED GO TO YL0020

ASK: Emancipated youth respondents

**PATH ID: YL0019**

Can you tell me more about your plans to move? [For example, your new street address or the city or state to which you plan to move?]

PROBE FOR AND RECORD ANY KNOWN INFORMATION.

\_\_\_\_\_

ASK: Respondents who indicate they might be moving (YL0018=1)

**PATH ID: YL0020**

In case we cannot reach you, can you please give me the contact information of two relatives, friends or neighbors who will always know how to get in touch with you? We would prefer to have information for people who do not live with you.

What is the first person's name? VERIFY ALL SPELLING.

\_\_\_\_\_

FIRST NAME

MI

LAST NAME

ASK: Emancipated youth respondents

PROGRAM: If the first name is don't know or refused, continue on to ask MI and LAST.

GO TO: If FIRST NAME, MI and LAST are all don't know or refused, GO TO LCYS01

**PATH ID: YL0021**

How are they related to you?

- 1 HUSBAND/WIFE
- 2 FATHER/MOTHER (INCLUDING IN-LAWS)
- 4 GRANDPARENT
- 8 BROTHER/SISTER (INCLUDING IN-LAWS)
- 13 FRIEND/NEIGHBOR
- 91 OTHER RELATIVE (SPECIFY) \_\_\_\_\_
- 92 OTHER NON-RELATIVE (SPECIFY) \_\_\_\_\_
- 8 DON'T KNOW
- 7 REFUSED

ASK: Emancipated youth respondents who provided a name in YL0020 (YL0020 NE DK or RF)

## Final Youth Baseline Questionnaire - English

**PATH ID: YL0022**

What is their address and telephone number? [VERIFY ALL SPELLING.](#)

|                 |              |     |
|-----------------|--------------|-----|
| MAILING ADDRESS |              |     |
| CITY            | STATE        | ZIP |
| AREA CODE       | PHONE NUMBER | EXT |

ASK: Emancipated youth respondents who provided a name in YL0020 (YL0020 NE DK or RF)

PROGRAM: If Mailing Address is don't know or refused, continue on to ask the rest of the address fields. If the area code is don't know or refused, do not ask the rest of the phone number or the extension. Allow blank fields/missing data for Area Code, Phone Number, and Ext.

**PATH ID: YL0024**

Can you please tell me their e-mail address? [VERIFY ALL SPELLING AND PUNCTUATION.](#)

|                |   |                 |
|----------------|---|-----------------|
|                | @ |                 |
| E-MAIL ADDRESS |   | E-MAIL PROVIDER |

-8 DON'T KNOW

-7 REFUSED

ASK: Emancipated youth respondents who provided a name in YL0020 (YL0020 NE DK or RF).

PROGRAM: Allow blank fields/missing data.

**PATH ID: YL0025**

What is the name of the second friend or relative? Again, we would prefer someone who does not live with you.

[VERIFY ALL SPELLING.](#)

|            |    |           |
|------------|----|-----------|
| FIRST NAME | MI | LAST NAME |
|------------|----|-----------|

ASK: Emancipated youth respondents who provided a name in YL0020 (YL0020 NE DK or RF)

PROGRAM: If the first name is don't know or refused, continue on to ask MI and LAST.

GO TO: If FIRST NAME, MI and LAST are all don't know or refused, GO TO LCYS01

## Final Youth Baseline Questionnaire - English

**PATH ID: YL0026**

How are they related to you?

- 1 HUSBAND/WIFE
- 2 FATHER/MOTHER (INCLUDING IN-LAWS)
- 4 GRANDPARENT
- 8 BROTHER/SISTER (INCLUDING IN-LAWS)
- 13 FRIEND/NEIGHBOR
- 91 OTHER RELATIVE (SPECIFY) \_\_\_\_\_
- 92 OTHER NON-RELATIVE (SPECIFY) \_\_\_\_\_
- 8 DON'T KNOW
- 7 REFUSED

ASK: Emancipated youth respondents who provided a name in YL0025 (YL0025 NE DK or RF)

**PATH ID: YL0027**

What is their address and telephone number? [VERIFY ALL SPELLING.](#)

\_\_\_\_\_

MAILING ADDRESS

\_\_\_\_\_

|       |       |       |
|-------|-------|-------|
| CITY  | STATE | ZIP   |
| _____ | _____ | _____ |

|           |              |       |
|-----------|--------------|-------|
| AREA CODE | PHONE NUMBER | EXT   |
| _____     | _____        | _____ |

ASK: All emancipated youth respondents who provided a name in YL0025 (YL0025 NE DK or RF)

PROGRAM: If Mailing Address is don't know or refused, continue on to ask the rest of the address fields. If the area code is don't know or refused, do not ask the rest of the phone number or the extension. Allow blank fields/missing data for Area Code, Phone Number, and Ext.

**PATH ID: YL0029**

Can you please tell me their e-mail address? [VERIFY ALL SPELLING AND PUNCTUATION.](#)

\_\_\_\_\_ @ \_\_\_\_\_

|                |                 |
|----------------|-----------------|
| E-MAIL ADDRESS | E-MAIL PROVIDER |
|----------------|-----------------|

- 8 DON'T KNOW
- 7 REFUSED

ASK: All emancipated youth respondents who provided a name in YL0025 (YL0025 NE DK or RF).

PROGRAM: Allow blank fields/missing data.

**PATH ID: LCYS01**

[INTERVIEWER: IN WHAT LANGUAGE DID YOU MOSTLY CONDUCT THE CAPI PORTIONS OF THIS INTERVIEW IN?](#)

- 1 ENGLISH
- 2 SPANISH

ASK: All youth and emancipated youth respondents (asked of Interviewer).

## Final Youth Baseline Questionnaire - English

**PATH ID: YL3003**

Thank you for taking the time to answer these questions.

ENTER 1 TO CONTINUE. THIS IS THE END OF THE YOUTH INTERVIEW.

ASK: All youth and emancipated youth respondents

GO TO: END INTERVIEW AND RETURN TO IMS



## Final Youth Baseline Questionnaire - English

### APPENDIX A: LOGIC CHECKS AND CONFIRMATIONS

| Question Called From | Type of check | Logic                     | Message to display                                                                                                                                                       | Response options and actions                                                   |
|----------------------|---------------|---------------------------|--------------------------------------------------------------------------------------------------------------------------------------------------------------------------|--------------------------------------------------------------------------------|
| <b>Cigarettes</b>    |               |                           |                                                                                                                                                                          |                                                                                |
| YC1006               | Range/soft    | If YC1006 <= 10           | The computer recorded that you first tried cigarette smoking at age [YC1006]. Is that correct?<br>Yes<br>No, I need to change my answer<br>DK/R                          | Yes: Go to next question<br>No: Go back to YC1006<br>DK/R: Go to next question |
| YC1006               | Range/soft    | If YC1006 > CURRENT AGE   | The computer recorded that you first tried cigarette smoking at age [YC1006]. That is older than you are now.<br>Do you want to change your answer?<br>Yes<br>No<br>DK/R | Yes: Go to YC1006<br>No: Go to next question<br>DK/R: Go to next question      |
| YC1051               | Range/soft    | If YC1051yy > CURRENT AGE | The computer recorded that you have been smoking your regular brand for [YC1051]. Is that correct?<br>Yes<br>No, I need to change my answer<br>DK/R                      | Yes: Go to next question<br>No: Go back to YC1051<br>DK/R: Go to next question |
| YC1098               | Range/soft    | If YC1098 > 20            | The computer recorded that you used a coupon [YC1098] times to buy cigarettes. Is that correct?<br>Yes<br>No, I need to change my answer<br>DK/R                         | Yes: Go to next question<br>No: Go back to YC1098<br>DK/R: Go to next question |

## Final Youth Baseline Questionnaire - English

| Question Called From | Type of check | Logic                   | Message to display                                                                                                                                                    | Response options and actions                                                   |
|----------------------|---------------|-------------------------|-----------------------------------------------------------------------------------------------------------------------------------------------------------------------|--------------------------------------------------------------------------------|
| YC1022               | Range/soft    | If YC1022 > 30          | The computer recorded that you smoked cigarettes on [YC1022] of the last 30 days. Do you want to change your answer?<br>Yes<br>No<br>DK/R                             | Yes: Go back to YC1022<br>No: Go to next question<br>DK/R: Go to next question |
| <b>E-Cigarettes</b>  |               |                         |                                                                                                                                                                       |                                                                                |
| YE1006               | Range/soft    | If YE1006 <= 10         | The computer recorded that you first tried an e-cigarette at age [YE1006]. Is that correct?<br>Yes<br>No, I need to change my answer<br>DK/R                          | Yes: Go to next question<br>No: Go back to YE1006<br>DK/R: Go to next question |
| YE1006               | Range/soft    | If YE1006 > CURRENT AGE | The computer recorded that you first tried an e-cigarette at age [YE1006]. That is older than you are now.<br>Do you want to change your answer?<br>Yes<br>No<br>DK/R | Yes: Go to YE1006<br>No: Go to next question<br>DK/R: Go to next question      |
| YE1098               | Range/soft    | If YE1098 > 20          | The computer recorded that you used a coupon [YE1098] times to buy [ECIGFILL]. Is that correct?<br>Yes<br>No, I need to change my answer<br>DK/R                      | Yes: Go to next question<br>No: Go back to YE1098<br>DK/R: Go to next question |

## Final Youth Baseline Questionnaire - English

| Question Called From | Type of check | Logic                   | Message to display                                                                                                                                                  | Response options and actions                                                   |
|----------------------|---------------|-------------------------|---------------------------------------------------------------------------------------------------------------------------------------------------------------------|--------------------------------------------------------------------------------|
| YE1022               | Range/soft    | If YE1022 > 30          | The computer recorded that you used e-cigarettes on [YE1022] of the last 30 days. Do you want to change your answer?<br>Yes<br>No<br>DK/R                           | Yes: Go back to YE1022<br>No: Go to next question<br>DK/R: Go to next question |
| <b>Pipe</b>          |               |                         |                                                                                                                                                                     |                                                                                |
| YP1006               | Range/soft    | If YP1006 <= 10         | The computer recorded that you first tried pipe tobacco at age [YP1006]. Is that correct?<br>Yes<br>No, I need to change my answer<br>DK/R                          | Yes: Go to next question<br>No: Go back to YP1006<br>DK/R: Go to next question |
| YP1006               | Range/soft    | If YP1006 > CURRENT AGE | The computer recorded that you first tried pipe tobacco at age [YP1006]. That is older than you are now.<br>Do you want to change your answer?<br>Yes<br>No<br>DK/R | Yes: Go to YP1006<br>No: Go to next question<br>DK/R: Go to next question      |
| YP1098               | Range/soft    | If YP1098 > 20          | The computer recorded that you used a coupon [YP1098] times to buy pipe tobacco. Is that correct?<br>Yes<br>No, I need to change my answer<br>DK/R                  | Yes: Go to next question<br>No: Go back to YP1098<br>DK/R: Go to next question |

## Final Youth Baseline Questionnaire - English

| Question Called From | Type of check | Logic                   | Message to display                                                                                                                                              | Response options and actions                                                   |
|----------------------|---------------|-------------------------|-----------------------------------------------------------------------------------------------------------------------------------------------------------------|--------------------------------------------------------------------------------|
| YP1022               | Range/soft    | If YP1022 > 30          | The computer recorded that you smoked a pipe on [YP1022] of the last 30 days. Do you want to change your answer?<br>Yes<br>No<br>DK/R                           | Yes: Go back to YP1022<br>No: Go to next question<br>DK/R: Go to next question |
| <b>Hookah</b>        |               |                         |                                                                                                                                                                 |                                                                                |
| YH1006               | Range/soft    | If YH1006 <= 10         | The computer recorded that you first tried a hookah at age [YH1006]. Is that correct?<br>Yes<br>No, I need to change my answer<br>DK/R                          | Yes: Go to next question<br>No: Go back to YH1006<br>DK/R: Go to next question |
| YH1006               | Range/soft    | If YH1006 > CURRENT AGE | The computer recorded that you first tried a hookah at age [YH1006]. That is older than you are now.<br>Do you want to change your answer?<br>Yes<br>No<br>DK/R | Yes: Go to YH1006<br>No: Go to next question<br>DK/R: Go to next question      |
| YH1098               | Range/soft    | If YH1098 > 20          | The computer recorded that you used a coupon [YH1098] times to buy hookah tobacco. Is that correct?<br>Yes<br>No, I need to change my answer<br>DK/R            | Yes: Go to next question<br>No: Go back to YH1098<br>DK/R: Go to next question |

## Final Youth Baseline Questionnaire - English

| Question Called From       | Type of check | Logic           | Message to display                                                                                                                                                 | Response options and actions                                                   |
|----------------------------|---------------|-----------------|--------------------------------------------------------------------------------------------------------------------------------------------------------------------|--------------------------------------------------------------------------------|
| YH9004                     | Range/soft    | If YH9004 > 500 | The computer recorded that, on average, you smoke tobacco in a hookah [YH9004] times in a month. Is that correct?<br>Yes<br>No, I need to change my answer<br>DK/R | Yes: Go to next question<br>No: Go back to YH9004<br>DK/R: Go to next question |
| YH9005                     | Range/soft    | If YH9005 > 150 | The computer recorded that, on average, you smoke tobacco in a hookah [YH9005] times in a week. Is that correct?<br>Yes<br>No, I need to change my answer<br>DK/R  | Yes: Go to next question<br>No: Go back to YH9005<br>DK/R: Go to next question |
| YH9006                     | Range/soft    | If YH9006 > 20  | The computer recorded that, on average, you smoke tobacco in a hookah [YH9006] times each day. Is that correct?<br>Yes<br>No, I need to change my answer<br>DK/R   | Yes: Go to next question<br>No: Go back to YH9006<br>DK/R: Go to next question |
| <b>Dissolvable Tobacco</b> |               |                 |                                                                                                                                                                    |                                                                                |
| YD1006                     | Range/soft    | If YD1006 <= 10 | The computer recorded that you first used dissolvable tobacco at age [YD1006]. Is that correct?<br>Yes<br>No, I need to change my answer<br>DK/R                   | Yes: Go to next question<br>No: Go back to YD1006<br>DK/R: Go to next question |

## Final Youth Baseline Questionnaire - English

| Question Called From | Type of check | Logic                   | Message to display                                                                                                                                                        | Response options and actions                                                   |
|----------------------|---------------|-------------------------|---------------------------------------------------------------------------------------------------------------------------------------------------------------------------|--------------------------------------------------------------------------------|
| YD1006               | Range/soft    | If YD1006 > CURRENT AGE | The computer recorded that you first used dissolvable tobacco at age [YD1006]. That is older than you are now.<br>Do you want to change your answer?<br>Yes<br>No<br>DK/R | Yes: Go to YD1006<br>No: Go to next question<br>DK/R: Go to next question      |
| YD1098               | Range/soft    | If YD1098 > 20          | The computer recorded that you used a coupon [YD1098] times to buy dissolvable tobacco. Is that correct?<br>Yes<br>No, I need to change my answer<br>DK/R                 | Yes: Go to next question<br>No: Go back to YD1098<br>DK/R: Go to next question |
| YD1022               | Range/soft    | If YD1022 > 30          | The computer recorded that you used a dissolvable tobacco product on [YD1022] of the last 30 days. Do you want to change your answer?<br>Yes<br>No<br>DK/R                | Yes: Go back to YD1022<br>No: Go to next question<br>DK/R: Go to next question |
| <b>Cigars</b>        |               |                         |                                                                                                                                                                           |                                                                                |
| YG1006               | Range/soft    | If YG1006 <= 10         | The computer recorded that you first smoked a [CIGARFILL] at age [YG1006]. Is that correct?<br>Yes<br>No, I need to change my answer<br>DK/R                              | Yes: Go to next question<br>No: Go back to YG1006<br>DK/R: Go to next question |

## Final Youth Baseline Questionnaire - English

| Question Called From     | Type of check | Logic                   | Message to display                                                                                                                                                    | Response options and actions                                                   |
|--------------------------|---------------|-------------------------|-----------------------------------------------------------------------------------------------------------------------------------------------------------------------|--------------------------------------------------------------------------------|
| YG1006                   | Range/soft    | If YG1006 > CURRENT AGE | The computer recorded that you first smoked a [CIGARFILL] at age [YG1006]. That is older than you are now.<br>Do you want to change your answer?<br>Yes<br>No<br>DK/R | Yes: Go to YG1006<br>No: Go to next question<br>DK/R: Go to next question      |
| YG1098                   | Range/soft    | If YG1098 > 20          | The computer recorded that you used a coupon [YG1098] times to buy [CIGARFILL]s. Is that correct?<br>Yes<br>No, I need to change my answer<br>DK/R                    | Yes: Go to next question<br>No: Go back to YG1098<br>DK/R: Go to next question |
| YG1022                   | Range/soft    | If YG1022 > 30          | The computer recorded that you smoked a [CIGARFILL] on [YG1022] of the last 30 days. Do you want to change your answer?<br>Yes<br>No<br>DK/R                          | Yes: Go back to YG1022<br>No: Go to next question<br>DK/R: Go to next question |
| <b>Smokeless tobacco</b> |               |                         |                                                                                                                                                                       |                                                                                |
| YS1006                   | Range/soft    | If YS1006 <= 10         | The computer recorded that you first used [SMKLSSFILL] at age [YS1006]. Is that correct?<br>Yes<br>No, I need to change my answer<br>DK/R                             | Yes: Go to next question<br>No: Go back to YS1006<br>DK/R: Go to next question |

## Final Youth Baseline Questionnaire - English

| Question Called From     | Type of check | Logic                   | Message to display                                                                                                                                                 | Response options and actions                                                   |
|--------------------------|---------------|-------------------------|--------------------------------------------------------------------------------------------------------------------------------------------------------------------|--------------------------------------------------------------------------------|
| YS1006                   | Range/soft    | If YS1006 > CURRENT AGE | The computer recorded that you first used [SMKLSSFILL] at age [YS1006]. That is older than you are now.<br>Do you want to change your answer?<br>Yes<br>No<br>DK/R | Yes: Go to YS1006<br>No: Go to next question<br>DK/R: Go to next question      |
| YS1098                   | Range/soft    | If YS1098 > 20          | The computer recorded that you used a coupon [YS1098] times to buy [SMKLSSFILL]. Is that correct?<br>Yes<br>No, I need to change my answer<br>DK/R                 | Yes: Go to next question<br>No: Go back to YS1098<br>DK/R: Go to next question |
| YS1022                   | Range/soft    | If YS1022 > 30          | You said that you used [SMKLSSFILL] on [YS1022] of the last 30 days. Do you want to change your answer?<br>Yes<br>No<br>DK/R                                       | Yes: Go back to YS1022<br>No: Go to next question<br>DK/R: Go to next question |
| <b>Bidis and Kreteks</b> |               |                         |                                                                                                                                                                    |                                                                                |
| YB1006                   | Range/soft    | If YB1006 <= 10         | The computer recorded that you first tried a [BKFILL] at age [YB1006]. Is that correct?<br>Yes<br>No, I need to change my answer<br>DK/R                           | Yes: Go to next question<br>No: Go back to YB1006<br>DK/R: Go to next question |



## Final Youth Baseline Questionnaire - English

| Question Called From     | Type of check | Logic                   | Message to display                                                                                                                                                                                                                       | Response options and actions                                                   |
|--------------------------|---------------|-------------------------|------------------------------------------------------------------------------------------------------------------------------------------------------------------------------------------------------------------------------------------|--------------------------------------------------------------------------------|
| YB1006                   | Range/soft    | If YB1006 > CURRENT AGE | The computer recorded that you first tried a [BKFill] at age [YB1006]. That is older than you are now.<br>Do you want to change your answer?<br>Yes<br>No<br>DK/R                                                                        | Yes: Go to YB1006<br>No: Go to next question<br>DK/R: Go to next question      |
| YB1098                   | Range/soft    | If YB1098 > 20          | The computer recorded that you used a coupon [YB1098] times to buy [BKFill]s. Is that correct?<br>Yes<br>No, I need to change my answer<br>DK/R                                                                                          | Yes: Go to next question<br>No: Go back to YB1098<br>DK/R: Go to next question |
| YB1022                   | Range/soft    | If YB1022 > 30          | The computer recorded that you smoked a [BKFill] on [YB1022] of the last 30 days. Do you want to change your answer?<br>Yes<br>No<br>DK/R                                                                                                | Yes: Go back to YB1022<br>No: Go to next question<br>DK/R: Go to next question |
| <b>Cessation/Quitter</b> |               |                         |                                                                                                                                                                                                                                          |                                                                                |
| YC1220                   | Range/soft    | If YC1220 > 100         | The computer recorded that you stopped smoking for one day or longer [YC1220] times in the past 12 months because you were trying to quit smoking cigarettes for good. Is that correct?<br>Yes<br>No, I need to change my answer<br>DK/R | Yes: Go to next question<br>No: Go back to YC1220<br>DK/R: Go to next question |

## Final Youth Baseline Questionnaire - English

| Question Called From    | Type of check | Logic                   | Message to display                                                                                                                                                                                          | Response options and actions                                                   |
|-------------------------|---------------|-------------------------|-------------------------------------------------------------------------------------------------------------------------------------------------------------------------------------------------------------|--------------------------------------------------------------------------------|
| <b>Secondhand Smoke</b> |               |                         |                                                                                                                                                                                                             |                                                                                |
| YX0068                  | Range/soft    | If YX0068 > 60          | The computer recorded that, during the last seven days, you were in close contact with others while they were smoking for [YX0068] hours. Is that correct?<br>Yes<br>No, I need to change my answer<br>DK/R | Yes: Go to next question<br>No: Go back to YX0068<br>DK/R: Go to next question |
| <b>Substance Use</b>    |               |                         |                                                                                                                                                                                                             |                                                                                |
| YX0074                  | Range/soft    | If YX0074 <= 10 or >= 0 | The computer recorded that you first started drinking alcohol at age [YX0074]. Is that correct?<br>Yes<br>No, I need to change my answer<br>DK/R                                                            | Yes: Go to next question<br>No: Go back to YX0074<br>DK/R: Go to next question |
| YX0074                  | Range/soft    | If YX0074 > CURRENT AGE | The computer recorded that you were [YX0074] years old when you first started drinking alcohol. That is older than your current age. Do you want to change your answer?<br>Yes<br>No<br>DK/R                | Yes: Go to YX0074<br>No: Go to next question<br>DK/R: Go to next question      |
| YX0079                  | Range/soft    | If YX0079 <= 10         | The computer recorded that you first started using marijuana, hash, THC, or grass at age [YX0079]. Is that correct?<br>Yes<br>No, I need to change my answer<br>DK/R                                        | Yes: Go to next question<br>No: Go back to YX0079<br>DK/R: Go to next question |

## Final Youth Baseline Questionnaire - English

| Question Called From | Type of check | Logic                                                                                      | Message to display                                                                                                                                                                                                  | Response options and actions                                                   |
|----------------------|---------------|--------------------------------------------------------------------------------------------|---------------------------------------------------------------------------------------------------------------------------------------------------------------------------------------------------------------------|--------------------------------------------------------------------------------|
| YX0079               | Range/soft    | If YX0079 > CURRENT AGE                                                                    | The computer recorded that you were [YX0079] years old when you first started using marijuana, hash, THC, or grass. That is older than your current age.<br>Do you want to change your answer?<br>Yes<br>No<br>DK/R | Yes: Go to YX0079<br>No: Go to next question<br>DK/R: Go to next question      |
| YX0082               | Range/soft    | If YX0082 <= 10                                                                            | The computer recorded that you first started using [SUBSTANCEFILL] at age [YX0082]. Is that correct?<br>Yes<br>No, I need to change my answer<br>DK/R                                                               | Yes: Go to next question<br>No: Go back to YX0082<br>DK/R: Go to next question |
| YX0082               | Range/soft    | If YX0082 > CURRENT AGE                                                                    | The computer recorded that you were [YX0082] years old when you first started using [SUBSTANCEFILL]. That is older than your current age.<br>Do you want to change your answer?<br>Yes<br>No<br>DK/R                | Yes: Go to YX0082<br>No: Go to next question<br>DK/R: Go to next question      |
| <b>Demographics</b>  |               |                                                                                            |                                                                                                                                                                                                                     |                                                                                |
| YX0137               | Range/soft    | IF UNIT = MONTHS, NUMBER cannot be > 10. If UNIT = Weeks, NUMBER cannot be greater than 42 | The computer recorded that you have been pregnant for [YX0137] {months/weeks}. Is that correct?<br>Yes<br>No, I need to change my answer<br>DK/R                                                                    | Yes: Go to next question<br>No: Go back to YX0137<br>DK/R: Go to next question |

## Final Youth Baseline Questionnaire - English

| Question Called From            | Type of check | Logic                                            | Message to display                                                                                                                                                                       | Response options and actions                                                   |
|---------------------------------|---------------|--------------------------------------------------|------------------------------------------------------------------------------------------------------------------------------------------------------------------------------------------|--------------------------------------------------------------------------------|
| <b>Emancipated Youth Module</b> |               |                                                  |                                                                                                                                                                                          |                                                                                |
| YT0007                          | Range/soft    | If YT0007ff > 8 or YT0007ff < 4 or YT0007ii > 12 | The computer recorded that you are [YT0007ff] feet [and YT0007ii inches] tall. Is that correct?<br>Yes<br>No, I need to change my answer<br>DK/R                                         | Yes: Go to next question<br>No: Go back to YT0007<br>DK/R: Go to next question |
| YX0312                          | Range/soft    | If YX0311 > 2.43 or YX0311 < 0.91                | The computer recorded that you are [YX0311] meters tall. Is that correct?<br>Yes<br>No, I need to change my answer<br>DK/R                                                               | Yes: Go to next question<br>No: Go back to YX0311<br>DK/R: Go to next question |
| YT0008                          | Range/soft    | If YT0008 > 500 or YT0008 < 75                   | The computer recorded that you weigh [YT0008] pounds. Is that correct?<br>Yes<br>No, I need to change my answer<br>DK/R                                                                  | Yes: Go to next question<br>No: Go back to YT0008<br>DK/R: Go to next question |
| YX0312                          | Range/soft    | If YX0312 > 227 or YX0312 < 34                   | The computer recorded that you weigh [YX0312] kilograms. Is that correct?<br>Yes<br>No, I need to change my answer<br>DK/R                                                               | Yes: Go to next question<br>No: Go back to YX0312<br>DK/R: Go to next question |
| YT0034                          | Range/soft    | If YT0034 NE 1                                   | The computer recorded that you made [YT0034] visits to the emergency room or urgent care center in the past 12 months. Is that correct?<br>Yes<br>No, I need to change my answer<br>DK/R | Yes: Go to next question<br>No: Go back to YT0034<br>DK/R: Go to next question |

## Final Youth Baseline Questionnaire - English

| Question Called From | Type of check | Logic                   | Message to display                                                                                                                                                                                                                                                        | Response options and actions                                                       |
|----------------------|---------------|-------------------------|---------------------------------------------------------------------------------------------------------------------------------------------------------------------------------------------------------------------------------------------------------------------------|------------------------------------------------------------------------------------|
| YT0042               | Range/soft    | If YT0042 > CURRENT AGE | <p>The computer recorded that you were [YT0042] years old when you were first told you had diabetes, sugar diabetes, high blood sugar, or borderline diabetes. That is older than your current age.<br/>Do you want to change your answer?</p> <p>Yes<br/>No<br/>DK/R</p> | <p>Yes: Go to YT0042<br/>No: Go to next question<br/>DK/R: Go to next question</p> |
| YT0041               | Range/soft    | If YT0041 > CURRENT AGE | <p>The computer recorded that you were [YT0041] years old when you were first told you had high blood pressure. That is older than your current age.<br/>Do you want to change your answer?</p> <p>Yes<br/>No<br/>DK/R</p>                                                | <p>Yes: Go to YT0041<br/>No: Go to next question<br/>DK/R: Go to next question</p> |
| YT0043               | Range/soft    | If YT0043 > CURRENT AGE | <p>The computer recorded that you were [YT0043] years old when you were first told you had high cholesterol. That is older than your current age.<br/>Do you want to change your answer?</p> <p>Yes<br/>No<br/>DK/R</p>                                                   | <p>Yes: Go to YT0043<br/>No: Go to next question<br/>DK/R: Go to next question</p> |

## Final Youth Baseline Questionnaire - English

| Question Called From | Type of check | Logic                   | Message to display                                                                                                                                                                                        | Response options and actions                                                       |
|----------------------|---------------|-------------------------|-----------------------------------------------------------------------------------------------------------------------------------------------------------------------------------------------------------|------------------------------------------------------------------------------------|
| YT0038               | Range/soft    | If YT0038 > CURRENT AGE | <p>The computer recorded that you were [YT0038] years old when you were first told you had asthma. That is older than your current age. Do you want to change your answer?</p> <p>Yes<br/>No<br/>DK/R</p> | <p>Yes: Go to YT0038<br/>No: Go to next question<br/>DK/R: Go to next question</p> |

## Final Youth Baseline Questionnaire - English

### APPENDIX B: USER GROUP DEFINITIONS

| User Group Name          | User Group Definition                                                                         | User Group Specification                                                                                                                                                                                                                                                         |
|--------------------------|-----------------------------------------------------------------------------------------------|----------------------------------------------------------------------------------------------------------------------------------------------------------------------------------------------------------------------------------------------------------------------------------|
| <b>EVER_USE_TOB</b>      | Respondents who have ever used any tobacco products in lifetime.                              | EVER_USE_TOB=1 if (YC1002=1) OR (YE1002=1) OR (YG1002=1) OR (YP1002=1) OR (YH1002=1) OR (YS1002[1 or 2]=1) OR (YD1002=1) OR (YB9102[1 or 2]=1).<br>Else EVER_USE_TOB=2.                                                                                                          |
| <b>EVER_USE_CIGS</b>     | Respondents who have only ever used cigarettes in lifetime.                                   | EVER_USE_CIGS=1 if (YC1002=1) AND (YE1002 NE 1) AND (YG1002 NE 1) AND (YP1002 NE 1) AND (YH1002 NE 1) AND (YS1002[3]=1) AND (YD1002 NE 1) AND (YB9102[3]=1).<br>Else EVER_USE_CIGS=2.                                                                                            |
| <b>EVER_USE_DUAL</b>     | Respondents who have ever used cigarettes and at least one other tobacco product in lifetime. | EVER_USE_DUAL=1 if (YC1002 = 1) AND (YE1002=1) OR (YG1002=1) OR (YP1002=1) OR (YH1002=1) OR (YS1002[1 or 2]=1) OR (YD1002=1) OR (YB9102[1 or 2]=1).<br>Else EVER_USE_DUAL=2.                                                                                                     |
| <b>EVER_USE_TOBXCIGS</b> | Respondents who have ever used any tobacco products, excluding cigarettes, in lifetime.       | EVER_USE_TOBXCIGS=1 if (YC1002 NE 1) AND (YE1002=1) OR (YG1002=1) OR (YP1002=1) OR (YH1002=1) OR (YS1002[1 or 2]=1) OR (YD1002=1) OR (YB9102[1 or 2]=1).<br>Else EVER_USE_TOBXCIGS=2.                                                                                            |
| <b>PASTYEAR_TOB_USE</b>  | Respondents who have used any tobacco products in the past year.                              | PASTYEAR_TOB_USE=1 if (YC1112=1, 2, 3, 4 or 5) OR (YE1112=1, 2, 3, 4 or 5) OR (YG1112=1, 2, 3, 4 or 5) OR (YP1112=1, 2, 3, 4 or 5) OR (YH1112=1, 2, 3, 4 or 5) OR (YS1112=1, 2, 3, 4 or 5) OR (YD1112=1, 2, 3, 4 or 5) OR (YB1112=1, 2, 3, 4 or 5).<br>Else, PASTYEAR_TOB_USE=2. |
| <b>PAST30DAY_CIGS</b>    | Past 30 Day Users - Cigarettes                                                                | PAST30DAY_CIGS = 1 Yes, if respondent has smoked a cigarette within the past 30 days (YC1112=1 or 2 or 3).<br>Else PAST30DAY_CIGS = 2 No.                                                                                                                                        |

## Final Youth Baseline Questionnaire - English

| User Group Name              | User Group Definition                       | User Group Specification                                                                                                                                                                                              |
|------------------------------|---------------------------------------------|-----------------------------------------------------------------------------------------------------------------------------------------------------------------------------------------------------------------------|
| <b>PAST30DAY_VL_CIGS</b>     | Past 30 Day Very Light Users - Cigarettes   | PAST30DAY_VL_CIGS = 1 Yes, if respondent has smoked less than 10 cigarettes in lifetime (YC1005=1 or 2 or 3) AND last smoked a cigarette in the past 30 days (YC1112=1 or 2 or 3).<br>Else PAST30DAY_VL_CIGS = 2 No.  |
| <b>PAST30DAY_NL_CIGS</b>     | Past 30 Day Not Light Users - Cigarettes    | PAST30DAY_NL_CIGS = 1 Yes, if respondent has smoked more than 10 cigarettes in lifetime (YC1005 > 3) AND last smoked a cigarette within the past 30 days (YC1112=1 or 2 or 3).<br>Else PAST30DAY_NL_CIGS = 2 No.      |
| <b>PAST30DAY_ECIGS</b>       | Past 30 Day Users - e-Cigarettes            | PAST30DAY_ECIGS = 1 Yes, if respondent has used an e-cigarette within the past 30 days (YE1112=1 or 2 or 3).<br>Else PAST30DAY_ECIGS = 2 No.                                                                          |
| <b>PAST30DAY_VL_ECIGS</b>    | Past 30 Day Very Light Users - e-Cigarettes | PAST30DAY_VL_ECIGS = 1 Yes, if respondent has used 1 or more puffs of an e-cigarette in lifetime (YE1005=1) AND last used an e-cigarette in the past 30 days (YE1112=1 or 2 or 3).<br>Else PAST30DAY_VL_ECIGS = 2 No. |
| <b>PAST30DAY_NL_ECIGS</b>    | Past 30 Day Not Light Users - e-Cigarettes  | PAST30DAY_NL_ECIGS = 1 Yes, if respondent has used 1 or more e-cigarettes in lifetime (YC1005 > 1) AND last used an e-cigarette within the past 30 days (YE1112=1 or 2 or 3).<br>Else PAST30DAY_NL_ECIGS = 2 No.      |
| <b>PAST30DAY_[CIGARFILL]</b> | Past 30 Day Users - Cigars                  | PAST30DAY_[CIGARFILL] = 1 Yes, if respondent has smoked a [CIGARFILL] within the past 30 days (YG1112=1 or 2 or 3).<br>Else PAST30DAY_[CIGARFILL]= 2 No.                                                              |



## Final Youth Baseline Questionnaire - English

| User Group Name                 | User Group Definition                                                                       | User Group Specification                                                                                                                                                                                                         |
|---------------------------------|---------------------------------------------------------------------------------------------|----------------------------------------------------------------------------------------------------------------------------------------------------------------------------------------------------------------------------------|
| <b>PAST30DAY_VL_[CIGARFILL]</b> | Past 30 Day Very Light Users - Cigars                                                       | PAST30DAY_VL_[CIGARFILL]= 1 Yes, if respondent has smoked less than 10 [CIGARFILL]s in lifetime (YG1005=1 or 2 or 3) AND last smoked a [CIGARFILL] in the past 30 days (YG1112=1 or 2 or 3).Else PAST30DAY_VL_[CIGARFILL]= 2 No. |
| <b>PAST30DAY_NL_[CIGARFILL]</b> | Past 30 Day Not Light Users - Cigars                                                        | PAST30DAY_NL_[CIGARFILL]= 1 Yes, if respondent has smoked more than 10 [CIGARFILL]s in lifetime (YG1005 > 3) AND last smoked a [CIGARFILL] within the past 30 days (YG1112=1 or 2 or 3).<br>Else PAST30DAY_NL_[CIGARFILL]= 2 No. |
| <b>BLUNT_ONLY_GRILLO</b>        | Respondents that report never smoking a cigar, but report smoking cigarillos as blunts      | BLUNT_ONLY_GRILLO=1 YES, if YG1002=2 OR YG9104(2)=2 AND YG9107=1 AND YG9009=1 OR 3.<br>Else BLUNT_ONLY_GRILLO=2 NO.                                                                                                              |
| <b>BLUNT_ONLY_GFC</b>           | Respondents that report never smoking a cigar, but report smoking filtered cigars as blunts | BLUNT_ONLY_GFC=1 YES, if YG1002=2 OR YG9104(2)=2 AND YG9107=1 AND YG9009=2.<br>Else BLUNT_ONLY_GFC=2 NO.                                                                                                                         |
| <b>PAST30DAY_PIPE</b>           | Past 30 Day Users - Pipe                                                                    | PAST30DAY_PIPE = 1 Yes, if respondent has smoked a pipe within the past 30 days (YP1112=1 or 2 or 3).<br>Else PAST30DAY_PIPE = 2 No.                                                                                             |
| <b>PAST30DAY_VL_PIPE</b>        | Past 30 Day Very Light Users - Pipe                                                         | PAST30DAY_VL_PIPE = 1 Yes, if respondent has smoked less than 10 bowls of pipe tobacco in lifetime (YP1005=1 or 2 or 3) AND last smoked a pipe in the past 30 days (YP1112=1 or 2 or 3).<br>Else PAST30DAY_VL_PIPE = 2 No.       |

## Final Youth Baseline Questionnaire - English

| User Group Name           | User Group Definition                         | User Group Specification                                                                                                                                                                                                                |
|---------------------------|-----------------------------------------------|-----------------------------------------------------------------------------------------------------------------------------------------------------------------------------------------------------------------------------------------|
| PAST30DAY_NL_PIPE         | Past 30 Day Not Light Users - Pipe            | PAST30DAY_NL_PIPE = 1 Yes, if respondent has smoked more than 10 bowls of pipe tobacco in lifetime (YP1005 > 3) AND last smoked a pipe within the past 30 days (YP1112=1 or 2 or 3).<br>Else PAST30DAY_NL_PIPE = 2 No.                  |
| PAST30DAY_[SMKLSSFILL]    | Past 30 Day Users - Smokeless/Snus            | PAST30DAY_[SMKLSSFILL] = 1 Yes, if respondent has used smokeless tobacco within the past 30 days (YS1112=1 or 2 or 3).<br>Else PAST30DAY_[SMKLSSFILL] = 2 No.                                                                           |
| PAST30DAY_VL_[SMKLSSFILL] | Past 30 Day Very Light Users - Smokeless/Snus | PAST30DAY_VL_[SMKLSSFILL] = 1 Yes, if respondent has used less than 10 times/pouches in lifetime (YS1005=1 or 2) AND last used smokeless tobacco in the past 30 days (YS1112=1 or 2 or 3).<br>Else PAST30DAY_VL_[SMKLSSFILL] = 2 No.    |
| PAST30DAY_NL_[SMKLSSFILL] | Past 30 Day Not Light Users - Smokeless/Snus  | PAST30DAY_NL_[SMKLSSFILL] = 1 Yes, if respondent has used more than 10 times/pouches in lifetime (YS1005 > 2) AND last used smokeless tobacco within the past 30 days (YS1112=1 or 2 or 3).<br>Else PAST30DAY_NL_[SMKLSSFILL] = 2 No.   |
| PAST30DAY_DISS            | Past 30 Day Users - Dissolvable               | PAST30DAY_DISS = 1 Yes, if respondent has used dissolvable tobacco within the past 30 days (YD1112=1 or 2 or 3).<br>Else PAST30DAY_DISS = 2 No.                                                                                         |
| PAST30DAY_VL_DISS         | Past 30 Day Very Light Users - Dissolvable    | PAST30DAY_VL_DISS = 1 Yes, if respondent has used less than 10 pieces of dissolvable tobacco in lifetime (YD1005=1 or 2) AND last used dissolvable tobacco in the past 30 days (YD1112=1 or 2 or 3).<br>Else PAST30DAY_VL_DISS = 2 No.  |
| PAST30DAY_NL_DISS         | Past 30 Day Not Light Users - Dissolvable     | PAST30DAY_NL_DISS = 1 Yes, if respondent has used more than 10 pieces of dissolvable tobacco in lifetime (YD1005 > 2) AND last used dissolvable tobacco within the past 30 days (YD1112=1 or 2 or 3).<br>Else PAST30DAY_NL_DISS = 2 No. |

## Final Youth Baseline Questionnaire - English

| User Group Name              | User Group Definition                            | User Group Specification                                                                                                                                                                                                   |
|------------------------------|--------------------------------------------------|----------------------------------------------------------------------------------------------------------------------------------------------------------------------------------------------------------------------------|
| <b>PAST30DAY_[BKFILL]</b>    | Past 30 Day Users - Bidis and Kreteks            | PAST30DAY_[BKFILL] = 1 Yes, if respondent has smoked a [BKFILL] within the past 30 days (YB1112=1 or 2 or 3).<br>Else PAST30DAY_[BKFILL] = 2 No.                                                                           |
| <b>PAST30DAY_VL_[BKFILL]</b> | Past 30 Day Very Light Users - Bidis and Kreteks | PAST30DAY_VL_[BKFILL] = 1 Yes, if respondent has smoked less than 10 [BKFILL]s in lifetime (YB1005=1 or 2 or 3) AND last smoked a [BKFILL] in the past 30 days (YB1112=1 or 2 or 3).<br>Else PAST30DAY_VL_[BKFILL] = 2 No. |
| <b>PAST30DAY_NL_[BKFILL]</b> | Past 30 Day Not Light Users - Bidis and Kreteks  | PAST30DAY_NL_[BKFILL] = 1 Yes, if respondent has smoked more than 10 [BKFILL]s in lifetime (YB1005 > 3) AND last smoked a [BKFILL] within the past 30 days (YB1112=1 or 2 or 3).<br>Else PAST30DAY_NL_[BKFILL] = 2 No.     |
